# Supplementary material for: Signatures of Environmental Genetic Adaptation Pinpoint Pathogens as the Main Selective Pressure through Human Evolution
Source: PLOS journal article supplement (doi:10.1371/journal.pgen.1002355), 2011-11-03
Supplement: S8 (10.1371/journal.pgen.1002355.s008) [file journal.pgen.1002355.s008]

Supplemental Table S4. Enrichment of genic SNPs for 3 different classes (low, medium and high) of similar Minor Allele Frequencies (MAF),  $F_{ST}$  or recombination rate.

|                           | <b>Q<sup>2</sup> bin</b> | <b>Genic enrichment</b> |        |       |
|---------------------------|--------------------------|-------------------------|--------|-------|
|                           |                          | Low                     | Medium | High  |
| <b>MAF</b>                | 62.5-75%                 | 1.021                   | 1.026  | 1.023 |
|                           | 75-87.5%                 | 1.033                   | 1.028  | 1.105 |
| <b>F<sub>ST</sub></b>     | 62.5-75%                 | 1.060                   | 1.012  | 1.008 |
|                           | 75-87.5%                 | 0.907                   | 1.044  | 1.042 |
| <b>Recombination rate</b> | 62.5-75%                 | 1.037                   | 1.017  | 1.019 |
|                           | 75-87.5%                 | 1.119                   | 1.026  | 1.051 |
