# Supplementary material for: Signatures of Environmental Genetic Adaptation Pinpoint Pathogens as the Main Selective Pressure through Human Evolution
Source: PLoS Genet. 2011 Nov 3;7(11):e1002355. doi: 10.1371/journal.pgen.1002355 (PMC3207877; doi:10.1371/journal.pgen.1002355)
Supplement: Table S1 — List of sampled populations with specification of their country, continental group and number of genotyped individuals. (XLS) [file pgen.1002355.s005.xls]

## Sheet: populations
ID	NAME	COUNTRY	CONTINENTAL GROUP	LATITUDE	LONGITUDE	NR. INDIVIDUALS
1	Bantu_N.E.	Kenya	Subsaharian_Africa	-3	37	11
2	Bantu_S.E.	South_Africa	Subsaharian_Africa	-26	26	8
3	Biaka_Pygmies	Central_African_Republic	Subsaharian_Africa	4	17	23
4	Mandenka	Senegal	Subsaharian_Africa	12	-12	22
5	Mbuti_Pygmies	Democratic_Republic_of_Congo	Subsaharian_Africa	1	29	13
6	San	Namibia	Subsaharian_Africa	-21	20	5
7	Colombians	Colombia	America	3	-68	7
8	Karitiana	Brazil	America	-10	-63	14
9	Maya	Mexico	America	19	-91	21
10	Pima	Mexico	America	29	-108	14
11	Surui	Brazil	America	-11	-62	8
12	Balochi	Pakistan	Central_South_Asia	31	67	24
13	Brahui	Pakistan	Central_South_Asia	31	67	25
14	Burusho	Pakistan	Central_South_Asia	37	74	25
15	Hazara	Pakistan	Central_South_Asia	34	70	22
16	Kalash	Pakistan	Central_South_Asia	36	72	23
17	Makrani	Pakistan	Central_South_Asia	26	64	25
18	Pathan	Pakistan	Central_South_Asia	34	64	23
19	Sindhi	Pakistan	Central_South_Asia	26	69	24
20	Uygur	China	Central_South_Asia	44	81	10
21	Cambodians	Cambodia	East_Asia	12	105	10
22	Dai	China	East_Asia	21	100	10
23	Daur	China	East_Asia	49	124	9
24	Hezhen	China	East_Asia	48	134	9
25	Lahu	China	East_Asia	22	100	8
26	Miaozu	China	East_Asia	28	109	10
27	Mongola	China	East_Asia	49	119	10
28	Naxi	China	East_Asia	26	100	8
29	Oroqen	China	East_Asia	51	127	9
30	She	China	East_Asia	27	119	10
31	Tu	China	East_Asia	36	101	10
32	Tujia	China	East_Asia	29	109	10
33	Xibo	China	East_Asia	44	82	9
34	Yakut	Russia	East_Asia	63	130	25
35	Yizu	China	East_Asia	28	103	10
36	Adygei	Russia	Europe	44	39	17
37	French	France	Europe	46	2	28
38	French_Basque	France	Europe	43	0	24
39	North_Italian	Italy	Europe	46	10	13
40	Orcadian	Orkney_Islands	Europe	59	-3	15
41	Russian	Russia	Europe	61	40	25
42	Sardinian	Italy	Europe	40	9	28
43	Bedouin	Israel	Middle_East	31	35	46
44	Druze	Israel	Middle_East	32	35	42
45	Mozabite	Algeria	North_Africa	32	3	29
46	Palestinian	Israel	Middle_East	32	35	46
47	NAN_Melanesian	Papua_New_Guinea	Oceania	-6	155	11
48	Papuan	Papua_New_Guinea	Oceania	-4	143	17
49	CHB	China	East_Asia	33	114	84
50	GIH	India	Central_South_Asia	23	73	88
51	JPT	Japan	East_Asia	38	138	86
52	LWK	Kenya	Subsaharian_Africa	0	35	90
53	MKK	Kenya	Subsaharian_Africa	-1	37	143
54	TSI	Italy	Europe	43	11	88
55	YRI	Nigeria	Subsaharian_Africa	8	6	113
						1537
