# Supplementary material for: Signatures of Environmental Genetic Adaptation Pinpoint Pathogens as the Main Selective Pressure through Human Evolution
Source: PLoS Genet. 2011 Nov 3;7(11):e1002355. doi: 10.1371/journal.pgen.1002355 (PMC3207877; doi:10.1371/journal.pgen.1002355)
Supplement: Table S3 — Environmental variables for each population. Values were averaged for each country. (XLS) [file pgen.1002355.s007.xls]

## Sheet: environments
POP. ID	POP. NAME	COUNTRY	DISTANCE FROM THE SEA	VIRUS DIVERSITY	BACTERIA DIVERSITY	PROTOZOA DIVERSITY	HELMINTHS DIVERSITY	RELATIVE HUMIDITY	TEMPERATURE (annual mean)	PRECIPITATION RATE (annual mean)	NET SHORT WAVE RADIATION FLUX	GATHERING	HUNTING	FISHING	ANIMAL HUSBANDRY	AGRICULTURE	TEMPERATURE (annual range)	IPITATION (annual range)
1	Bantu_N.E.	Kenya	498.892	49	80	18	37	73.8301	19.3549	2.27414e-05	207.379	2.5	7.83333	2.5	51.3333	44.5	3.32046	3.75e-05
2	Bantu_S.E.	South_Africa	665.178	46	81	18	34	43.1007	20.1468	1.27219e-05	207.547	2.5	10.5	2.5	40.5	50.5	12.217	3.76e-05
3	Biaka_Pygmies	Central_African_Republic	779.968	54	78	18	36	82.1879	23.8656	6.8681e-05	183.527	60.5	30.5	10.5	2.5	2.5	2.19149	6.05e-05
4	Mandenka	Senegal	312.225	51	78	18	32	48.4196	27.2192	3.29029e-05	206.894	10.5	2.5	20.5	20.5	50.5	9.213	0.000114164
5	Mbuti_Pygmies	Democratic_Republic_of_Congo	1344.04	50	79	17	36	89.5725	19.1906	9.25945e-05	181.06	60.5	30.5	10.5	2.5	2.5	0.956253	1.78e-05
6	San	Namibia	578.446	42	78	18	28	43.5628	22.1518	1.19297e-05	215.742	80.5	20.5	2.5	2.5	2.5	11.5336	4.01e-05
7	Colombians	Colombia	892.269	49	79	20	37	93.8217	23.6545	0.000129008	161.007	2.5	20.5	20.5	2.5	60.5	0.858486	4.01e-05
8	Karitiana	Brazil	1201.31	55	83	20	46	87.8554	24.3402	6.38522e-05	172.248	NA	NA	NA	NA	NA	2.28693	7.61e-05
9	Maya	Mexico	161.268	49	80	20	37	60.2119	21.431	3.19182e-05	201.766	16.5	10.5	15.5	2.5	60.5	11.4864	5.6e-05
10	Pima	Mexico	161.268	49	80	20	37	60.2119	21.431	3.19182e-05	201.766	16.5	10.5	15.5	2.5	60.5	11.4864	5.6e-05
11	Surui	Brazil	1201.31	55	83	20	46	87.8554	24.3402	6.38522e-05	172.248	NA	NA	NA	NA	NA	2.28693	7.61e-05
12	Balochi	Pakistan	765.454	45	79	17	28	52.4692	13.7501	1.60842e-05	189.486	4.1	2.5	6.1	40.5	54.5	20.2599	3.72e-05
13	Brahui	Pakistan	765.454	45	79	17	28	52.4692	13.7501	1.60842e-05	189.486	4.1	2.5	6.1	40.5	54.5	20.2599	3.72e-05
14	Burusho	Pakistan	765.454	45	79	17	28	52.4692	13.7501	1.60842e-05	189.486	4.1	2.5	6.1	40.5	54.5	20.2599	3.72e-05
15	Hazara	Pakistan	765.454	45	79	17	28	52.4692	13.7501	1.60842e-05	189.486	4.1	2.5	6.1	40.5	54.5	20.2599	3.72e-05
16	Kalash	Pakistan	765.454	45	79	17	28	52.4692	13.7501	1.60842e-05	189.486	4.1	2.5	6.1	40.5	54.5	20.2599	3.72e-05
17	Makrani	Pakistan	765.454	45	79	17	28	52.4692	13.7501	1.60842e-05	189.486	4.1	2.5	6.1	40.5	54.5	20.2599	3.72e-05
18	Pathan	Pakistan	765.454	45	79	17	28	52.4692	13.7501	1.60842e-05	189.486	4.1	2.5	6.1	40.5	54.5	20.2599	3.72e-05
19	Sindhi	Pakistan	765.454	45	79	17	28	52.4692	13.7501	1.60842e-05	189.486	4.1	2.5	6.1	40.5	54.5	20.2599	3.72e-05
20	Uygur	China	850.768	47	85	18	46	80.4104	8.67685	3.81712e-05	159.864	2.5	11.0714	11.3571	31.9286	49.0714	24.5073	8.53e-05
21	Cambodians	Cambodia	175.705	42	76	18	37	82.0452	25.3757	9.45384e-05	176.829	10.5	2.5	20.5	10.5	60.5	5.21667	0.000160938
22	Dai	China	850.768	47	85	18	46	80.4104	8.67685	3.81712e-05	159.864	2.5	11.0714	11.3571	31.9286	49.0714	24.5073	8.53e-05
23	Daur	China	850.768	47	85	18	46	80.4104	8.67685	3.81712e-05	159.864	2.5	11.0714	11.3571	31.9286	49.0714	24.5073	8.53e-05
24	Hezhen	China	850.768	47	85	18	46	80.4104	8.67685	3.81712e-05	159.864	2.5	11.0714	11.3571	31.9286	49.0714	24.5073	8.53e-05
25	Lahu	China	850.768	47	85	18	46	80.4104	8.67685	3.81712e-05	159.864	2.5	11.0714	11.3571	31.9286	49.0714	24.5073	8.53e-05
26	Miaozu	China	850.768	47	85	18	46	80.4104	8.67685	3.81712e-05	159.864	2.5	11.0714	11.3571	31.9286	49.0714	24.5073	8.53e-05
27	Mongola	China	850.768	47	85	18	46	80.4104	8.67685	3.81712e-05	159.864	2.5	11.0714	11.3571	31.9286	49.0714	24.5073	8.53e-05
28	Naxi	China	850.768	47	85	18	46	80.4104	8.67685	3.81712e-05	159.864	2.5	11.0714	11.3571	31.9286	49.0714	24.5073	8.53e-05
29	Oroqen	China	850.768	47	85	18	46	80.4104	8.67685	3.81712e-05	159.864	2.5	11.0714	11.3571	31.9286	49.0714	24.5073	8.53e-05
30	She	China	850.768	47	85	18	46	80.4104	8.67685	3.81712e-05	159.864	2.5	11.0714	11.3571	31.9286	49.0714	24.5073	8.53e-05
31	Tu	China	850.768	47	85	18	46	80.4104	8.67685	3.81712e-05	159.864	2.5	11.0714	11.3571	31.9286	49.0714	24.5073	8.53e-05
32	Tujia	China	850.768	47	85	18	46	80.4104	8.67685	3.81712e-05	159.864	2.5	11.0714	11.3571	31.9286	49.0714	24.5073	8.53e-05
33	Xibo	China	850.768	47	85	18	46	80.4104	8.67685	3.81712e-05	159.864	2.5	11.0714	11.3571	31.9286	49.0714	24.5073	8.53e-05
34	Yakut	Russia	394.966	48	83	15	40	84.6039	1.49154	1.83205e-05	113.221	5.16667	11.1667	11.1667	37.1667	40.5	34.681	2.71e-05
35	Yizu	China	850.768	47	85	18	46	80.4104	8.67685	3.81712e-05	159.864	2.5	11.0714	11.3571	31.9286	49.0714	24.5073	8.53e-05
36	Adygei	Russia	394.966	48	83	15	40	84.6039	1.49154	1.83205e-05	113.221	5.16667	11.1667	11.1667	37.1667	40.5	34.681	2.71e-05
37	French	France	199.65	42	82	16	31	81.2997	10.9676	2.81553e-05	152.381	2.5	2.5	20.5	30.5	50.5	15.9113	3.13e-05
38	French_Basque	France	199.65	42	82	16	31	81.2997	10.9676	2.81553e-05	152.381	2.5	2.5	20.5	30.5	50.5	15.9113	3.13e-05
39	North_Italian	Italy	53.6354	43	78	15	31	79.8475	14.4922	2.75959e-05	157.524	2.5	2.5	20.5	20.5	60.5	13.9994	2.93e-05
40	Orcadian	Orkney_Islands	29.0821	39	75	12	28	83.4727	8.38718	1.86412e-05	115.068	NA	NA	NA	NA	NA	7.66168	1.04e-05
41	Russian	Russia	394.966	48	83	15	40	84.6039	1.49154	1.83205e-05	113.221	5.16667	11.1667	11.1667	37.1667	40.5	34.681	2.71e-05
42	Sardinian	Italy	53.6354	43	78	15	31	79.8475	14.4922	2.75959e-05	157.524	2.5	2.5	20.5	20.5	60.5	13.9994	2.93e-05
43	Bedouin	Israel	68.5322	41	79	15	29	66.7333	18.5462	3.5841e-06	205.84	5.16667	5.16667	2.5	33.8333	62.8333	13.7536	8.54e-06
44	Druze	Israel	68.5322	41	79	15	29	66.7333	18.5462	3.5841e-06	205.84	5.16667	5.16667	2.5	33.8333	62.8333	13.7536	8.54e-06
45	Mozabite	Algeria	551.739	39	77	16	27	36.0636	19.8804	6.58352e-07	181.724	2.5	2.5	2.5	30.5	70.5	23.0658	1.73e-06
46	Palestinian	Israel	68.5322	41	79	15	29	66.7333	18.5462	3.5841e-06	205.84	5.16667	5.16667	2.5	33.8333	62.8333	13.7536	8.54e-06
47	NAN_Melanesian	Papua_New_Guinea	62.199	45	79	15	28	86.6135	24.5732	9.47712e-05	194.417	20.5	10.5	2.5	15.5	55.5	0.867382	4.65e-05
48	Papuan	Papua_New_Guinea	62.199	45	79	15	28	86.6135	24.5732	9.47712e-05	194.417	20.5	10.5	2.5	15.5	55.5	0.867382	4.65e-05
49	CHB	China	850.768	47	85	18	46	80.4104	8.67685	3.81712e-05	159.864	2.5	11.0714	11.3571	31.9286	49.0714	24.5073	8.53e-05
50	GIH	India	174.798	51	82	19	44	48.2657	26.225	1.23776e-05	208.283	2.5	2.5	10.5	20.5	70.5	12.022	5.77e-05
51	JPT	Japan	1	41	85	13	47	83.8461	11.0349	4.11294e-05	169.454	2.5	2.5	20.5	10.5	70.5	23.0197	6.94e-05
52	LWK Luhya	Kenya	498.892	49	80	18	37	73.8301	19.3549	2.27414e-05	207.379	2.5	7.83333	2.5	51.3333	44.5	3.32046	3.75e-05
53	MKK masai	Kenya	498.892	49	80	18	37	73.8301	19.3549	2.27414e-05	207.379	2.5	7.83333	2.5	51.3333	44.5	3.32046	3.75e-05
54	TSI	Italy	53.6354	43	78	15	31	79.8475	14.4922	2.75959e-05	157.524	2.5	2.5	20.5	20.5	60.5	13.9994	2.93e-05
55	YRI	Nigeria	235.324	54	78	18	38	83.026	25.029	4.72878e-05	196.146	2.5	2.5	20.5	10.5	70.5	4.19937	9.9e-05
