# Supplementary material for: Signatures of Environmental Genetic Adaptation Pinpoint Pathogens as the Main Selective Pressure through Human Evolution
Source: PLoS Genet. 2011 Nov 3;7(11):e1002355. doi: 10.1371/journal.pgen.1002355 (PMC3207877; doi:10.1371/journal.pgen.1002355)
Supplement: Table S5 — Improvement of explained variance (termed I(R2)) values and their p-values for the whole set of genes. (XLS) [file pgen.1002355.s009.xls]

## Sheet: I(R2)
Supplemental Table S5. Improvement of explained variance values and corresponding p-values for the whole set of genes.
	I(R2)			CORRECTED P-VALUES			P-VALUES
GENE	PATHOGENS	SUBSISTENCE	CLIMATE	PATHOGENS	SUBSISTENCE	CLIMATE	PATHOGENS	SUBSISTENCE	CLIMATE
A1CF	0.83605	0.0336582	0.0358725	1	1	1	0.926829	0.853259	0.652939
A2BP1	4.21166e-05	0.31755	0.0194322	1	1	1	1	0.502999	0.811275
A2LD1	0.32975	0.990492	0.00556424	1	1	1	0.271491	0.620952	0.971611
A2M	0.435337	0.151477	0.431521	1	1	1	0.853259	0.546181	0.878049
A2ML1	0.000740853	2.15557	0.102551	1	1	1	0.994002	0.165134	0.985206
A4GALT	0.0600981	1.48741	0.0238308	1	1	1	0.989604	0.247901	0.604158
A4GNT	0.538258	1.3231	0.198771	1	1	1	0.482207	0.347861	0.354258
AAA1	0.14527	2.08399	0.071515	1	1	1	0.983607	0.118752	0.858856
AAAS	7.04829	0.0593533	0.964845	1	1	1	0.0471811	0.606557	0.779688
AACS	0.496769	0.00325775	0.00608079	1	1	1	0.718912	0.914434	0.892043
AADAC	0.00882751	3.70582	0.282095	1	1	1	0.880848	0.0623751	0.236705
AADACL1	0.893101	1.91567	0.756105	1	1	1	0.995202	0.0155938	0.926429
AADACL2	0.244336	0.618975	1.74911	1	1	1	0.505398	0.345062	0.0207917
AADACL3	1.79684	1.68863	0.388175	1	1	1	0.441823	0.251499	0.690124
AADACL4	3.745	4.50218	0.245332	1	1	1	0.205518	0.0631747	0.933626
AADAT	0.981339	6.55057	0.631399	1	0.319225	1	0.0511795	0.000338918	0.0295882
AAK1	1.02795	0.160186	0.222937	1	1	1	0.0543783	0.590564	0.390244
AARS	0.643497	0.0237531	0.00967246	1	1	1	0.4998	0.906038	0.855258
AARS2	0.190592	4.62024	0.0171728	1	1	1	0.767693	0.0495802	0.860456
AARSD1	0.0089377	0.715309	1.7458	1	1	1	0.989204	0.478209	0.127149
AASDH	0.777378	1.80482e-05	0.0172326	1	1	1	0.0747701	0.995602	0.870052
AASDHPPT	2.16337	3.43126	0.0911201	0.300217	0.625623	1	0.00311167	0.00207391	0.553379
AASS	0.630923	1.33181	1.0605	1	1	1	0.868053	0.120352	0.069972
AATF	1.9339	1.63742	1.4239	1	1	1	0.865654	0.117553	0.503798
AATK	0.52875	1.33815	0.292336	1	1	1	0.982807	0.161535	0.926429
ABAT	0.00375025	0.0829039	0.0157978	1	1	1	0.983607	0.901639	0.731307
ABCA1	0.152956	1.47869	0.140968	1	0.300662	1	0.996801	0.000258144	0.726909
ABCA10	2.79844	0.867736	0.143957	0.071997	1	1	0.000187599	0.235106	0.673731
ABCA12	0.0390019	0.117992	0.624503	1	1	1	0.979608	0.613754	0.494602
ABCA13	0.165741	0.158561	0.0331115	1	1	1	0.770492	0.727309	0.696122
ABCA17P	2.57882	1.91453	0.142278	0.0539551	1	1	4.02881e-05	0.0883647	0.709316
ABCA2	0.222699	0.713426	0.0292514	1	1	1	0.339464	0.45102	0.771292
ABCA3	0.00805414	9.66954e-05	1.72971	1	1	1	0.946022	0.988405	0.142343
ABCA4	0.112733	0.989947	0.642225	1	1	1	0.879248	0.369052	0.167933
ABCA5	4.51152e-08	0.185592	1.41878	1	1	1	0.9996	0.544182	0.309876
ABCA6	0.554624	0.0597942	0.012225	1	1	1	0.337465	0.828869	0.958017
ABCA7	1.71156	2.65208	0.00518317	1	1	1	0.764894	0.103958	0.79928
ABCA8	0.0811808	0.103287	0.025616	1	1	1	0.908836	0.706118	0.965214
ABCA9	0.550818	0.00136002	1.06084	1	1	1	0.270292	0.967213	0.287485
ABCB1	1.37565	0.360899	1.84359	1	1	1	0.712515	0.261495	0.245502
ABCB10	0.16304	0.136528	0.0650147	1	1	1	0.740504	0.926829	0.52419
ABCB11	0.323061	0.060524	0.0676319	1	1	1	0.804478	0.793283	0.361855
ABCB4	0.464853	3.1348	0.219112	1	1	1	0.934826	0.0103958	0.665734
ABCB5	0.0805156	2.12021	0.0810512	1	1	1	0.852059	0.159136	0.818873
ABCB8	0.00581835	0.423322	0.391901	1	1	1	0.965214	0.422231	0.497801
ABCB9	3.89312	5.42787	0.109001	1	1	1	0.0243902	0.0391843	0.636945
ABCC1	1.23722	0.15775	0.147284	1	1	1	0.951219	0.593762	0.69892
ABCC10	0.784667	0.632834	0.243347	1	1	1	0.965614	0.0283886	0.978409
ABCC11	0.127208	3.69593	0.0620861	1	1	1	0.911635	0.103958	0.512595
ABCC12	0.546218	0.143888	0.0149328	1	1	1	0.9992	0.443822	0.87605
ABCC13	0.383975	0.22948	0.0233666	1	1	1	0.930428	0.594962	0.819272
ABCC2	0.234863	5.54478	0.779956	1	1	1	0.423031	0.0479808	0.347861
ABCC3	0.00679017	0.784141	0.283203	1	1	1	0.955618	0.529788	0.413435
ABCC4	2.18528	0.326702	0.31203	1	1	1	0.679328	0.413035	0.365054
ABCC5	0.295672	0.516447	0.000743074	1	1	1	0.917633	0.520592	0.964414
ABCC6	0.593623	0.449164	1.12492	1	1	1	0.695322	0.202319	0.144742
ABCC8	1.12655	0.433026	0.596296	1	1	1	1	0.0739704	0.670532
ABCC9	0.0425588	0.299408	0.859331	1	1	1	0.961615	0.395042	0.365854
ABCD2	2.046	3.38029	0.00214798	1	1	1	0.187525	0.0215914	0.951219
ABCD3	0.595806	0.767871	0.0307929	1	1	1	0.261495	0.157537	0.670932
ABCD4	1.18621	0.00310724	0.277253	1	1	1	0.0355858	0.940824	0.45102
ABCE1	0.0041999	0.864988	0.0349858	1	1	1	0.89884	0.189924	0.696921
ABCF1	0.160545	1.61537	4.60767	1	1	1	0.277889	0.119952	0.0215914
ABCF2	0.581888	0.693594	0.162047	1	1	1	0.371052	0.409036	0.166733
ABCF3	0.677701	0.609344	0.734808	1	1	1	0.957217	0.315874	0.303878
ABCG1	0.35276	0.922985	0.458271	1	1	1	0.908037	0.234306	0.396641
ABCG2	0.0677834	4.61079	1.23885	1	0.300662	1	0.934426	0.000143884	0.0755698
ABCG4	0.455016	1.76246	0.117573	1	0.451569	1	0.0219912	0.000956962	0.545782
ABCG5	1.12121	0.265801	0.0141548	0.204469	1	1	0.00177047	0.390644	0.810476
ABCG8	2.51603	1.23215	0.000151723	0.107459	1	1	0.000569728	0.196721	0.964014
ABHD1	0.626576	5.27478	0.751031	1	1	1	0.752099	0.0103958	0.171131
ABHD10	1.43057	2.64454	0.623078	0.464292	1	1	0.0053668	0.169932	0.187525
ABHD11	0.00833149	0.0763648	0.339778	1	1	1	0.846861	0.719312	0.741703
ABHD12	10.2482	4.06968	0.21447	0.0589018	0.373388	1	7.30855e-05	0.000572335	0.153139
ABHD12B	0.106259	0.897693	0.530494	1	1	1	0.561375	0.369452	0.611355
ABHD13	1.20004	0.0450525	3.62012	1	1	1	0.0159936	0.770892	0.00175616
ABHD2	1.34741	0.00719232	0.0027876	1	1	1	0.119952	0.930028	0.977209
ABHD3	0.00680356	1.93927	0.332227	1	1	1	0.826869	0.069972	0.434226
ABHD4	0.184483	0.184657	0.662771	1	1	1	0.979208	0.468213	0.826869
ABHD5	2.5307	0.109639	1.35468	1	1	1	0.245902	0.730908	0.39984
ABHD6	0.0599003	1.03695	0.109836	1	1	1	0.914834	0.0783686	0.778888
ABHD7	0.0961653	2.7539	0.452425	1	1	1	0.798481	0.192323	0.117153
ABI1	2.42203	0.00865429	0.00805804	1	1	1	0.105958	0.953619	0.810476
ABI2	12.8439	2.02477	0.6691	0.0907636	1	1	0.000368587	0.0367853	0.772891
ABI3	0.0172589	2.80343	1.51908	1	1	1	0.912835	0.0543783	0.00477515
ABI3BP	0.437811	0.126263	0.282601	1	1	1	0.834466	0.609756	0.371851
ABL1	0.101304	0.11217	0.00147586	1	1	1	0.970412	0.840464	0.908437
ABL2	2.30476	1.0631	0.00691604	1	1	1	0.509396	0.402239	0.815274
ABLIM1	0.00461653	0.000168432	0.144217	1	1	1	0.9988	0.982407	0.959616
ABLIM2	0.0347853	0.0906471	0.0102948	1	1	1	0.984406	0.806877	0.737705
ABLIM3	0.170189	0.000253545	0.0445295	1	1	1	0.646541	0.97441	0.820472
ABO	0.00447365	0.190956	0.0227143	1	1	1	0.831267	0.709716	0.845262
ABR	0.0210397	0.755205	0.00134737	1	1	1	0.993203	0.382247	0.922031
ABRA	1.97236	2.01607	0.677889	0.0852733	1	1	0.000315421	0.101959	0.079968
ABTB1	0.449322	0.225386	1.92247	1	1	1	0.705318	0.243503	0.0227909
ABTB2	0.00767067	1.19004	0.000533471	1	1	1	0.998401	0.354258	0.965214
ACAA1	4.99817	5.88097	0.381979	1	1	1	0.0239904	0.047581	0.915634
ACAA2	0.454277	2.04339	0.0676303	1	1	1	0.262295	0.0107957	0.676929
ACACA	0.574556	0.346685	0.122331	1	1	1	0.133547	0.42383	0.426229
ACACB	1.27505	1.98128	0.00994309	1	1	1	0.0495802	0.141144	0.818073
ACAD10	11.5433	2.7428	0.678432	0.212007	1	1	0.00189687	0.0191923	0.331867
ACAD11	6.11511	0.830937	0.0983195	0.0706757	1	1	0.000170706	0.0651739	0.70052
ACAD8	0.0170086	1.29399	0.150134	1	1	1	0.797281	0.189924	0.603359
ACAD9	0.111219	0.00527343	0.154813	1	1	1	0.628149	0.918433	0.459016
ACADL	2.62982	8.2912	1.72905	1	1	1	0.216713	0.0203918	0.447021
ACADM	0.0132853	1.66711	0.429743	1	1	1	0.995202	0.0635746	0.512995
ACADS	5.72868	6.92196	0.138023	0.0971078	0.300662	1	0.000434707	0.000126436	0.438625
ACADSB	2.76948	0.227422	0.0651736	1	1	1	0.0295882	0.570572	0.668533
ACAN	1.23163	0.0395204	0.0696447	1	1	1	0.0551779	0.702919	0.893243
ACAP1	0.00455575	0.000274591	1.11599	1	1	1	0.97481	0.991603	0.188325
ACAP2	11.8114	1.47844	0.522617	0.0505245	1	1	3.48669e-05	0.0207917	0.62455
ACAP3	10.357	1.85818	0.310314	0.0680158	1	1	0.000142415	0.0631747	0.673331
ACAT1	0.450775	0.47759	0.187754	1	1	1	0.690924	0.477009	0.660136
ACAT2	0.474794	0.042959	0.0348969	1	1	1	0.445022	0.794082	0.843662
ACBD3	0.0416835	0.136042	0.307818	1	1	1	0.80088	0.932427	0.27509
ACBD4	1.97263	0.211185	2.12863	1	1	1	0.0895642	0.735306	0.0427829
ACBD5	2.77465	0.524586	1.20219	1	1	1	0.223111	0.548581	0.0183926
ACBD6	0.847925	0.870361	0.0267552	1	1	1	0.251499	0.471012	0.897641
ACBD7	0.00624593	0.204816	0.0483686	1	1	1	0.956817	0.619352	0.687725
ACCN1	0.0733921	0.00674953	0.0586464	1	1	1	0.969212	0.913634	0.733307
ACCN2	1.04497	1.90177	0.0368668	1	1	1	0.0847661	0.156737	0.731707
ACCN3	0.0233717	2.02514	0.29554	1	1	1	0.906437	0.0795682	0.203519
ACCN4	0.550411	0.00364405	0.0687658	1	1	1	0.986006	0.895642	0.994002
ACCN5	1.21142	10.5006	0.582193	1	0.533538	1	0.692523	0.00145657	0.688525
ACCS	0.657277	0.0868765	0.101531	1	1	1	0.884446	0.853658	0.668133
ACCSL	0.0443143	1.80371	0.56113	1	1	1	0.963615	0.0219912	0.285486
ACD	0.96558	1.57235	0.247536	1	1	1	0.481807	0.0207917	0.898041
ACE	0.498062	0.538018	0.008001	1	1	1	0.7505	0.468613	0.806078
ACER1	0.0205407	0.000182061	0.00559774	1	1	1	0.70012	0.988005	0.880448
ACER2	0.060539	3.62711	0.503017	1	1	1	0.968812	0.079968	0.516993
ACER3	0.000645222	0.00826771	1.17334	1	1	1	0.964814	0.844462	0.115954
ACIN1	1.32627	0.162504	0.235506	1	1	1	0.741304	0.770892	0.331867
ACLY	1.39404	28.2039	0.129828	1	0.566341	1	0.253099	0.00164179	0.592163
ACMSD	0.751026	1.96992	0.178055	1	1	1	0.287885	0.151939	0.532187
ACN9	0.327638	0.0156886	1.97925	1	1	1	0.221112	0.87405	0.00440136
ACO1	0.579463	2.04081	0.252488	1	1	1	0.95002	0.616553	0.247901
ACO2	0.0131064	1.57952	0.249011	1	1	1	0.830068	0.0651739	0.264294
ACOT11	0.0986989	0.111268	0.256199	1	1	1	0.379448	0.498601	0.696521
ACOT12	0.0981953	0.39721	0.76559	1	1	1	0.983207	0.258696	0.784086
ACOT6	1.48898	3.31787	0.577551	0.175209	1	1	0.00137835	0.264294	0.247501
ACOT7	1.15921	4.97676	0.740407	1	1	1	0.806078	0.0163934	0.807277
ACOT8	1.73923	0.710408	0.400392	1	1	1	0.260296	0.29868	0.228708
ACOX1	1.54725	0.153429	0.0894344	1	1	1	0.941223	0.460616	0.995202
ACOX2	1.53106	3.89054	0.417054	1	1	1	0.578569	0.0271891	0.982807
ACOX3	3.0445	2.27338	0.774526	1	1	1	0.580168	0.0411835	0.964414
ACP1	1.21851	0.351314	0.15494	1	1	1	0.0503799	0.582567	0.376649
ACP2	6.64049	0.115885	0.0454765	1	1	1	0.0255898	0.77569	0.9992
ACP5	0.61135	2.32098	0.00812741	1	1	1	0.577769	0.079968	0.809676
ACP6	1.60911	4.69852	0.249161	1	1	1	0.0147941	0.0231907	0.301879
ACPL2	1.48312	0.815519	0.015544	1	1	1	0.414634	0.0955618	0.842863
ACPP	1.47186	0.000620235	0.802851	0.537157	1	1	0.00633739	0.982007	0.15034
ACR	1.10892	3.97525	0.869995	1	1	1	0.554978	0.0959616	0.479808
ACRBP	0.950359	4.08239	1.61721	1	1	1	0.515394	0.212715	0.0727709
ACRV1	3.58934	6.18242	0.82068	1	1	1	0.147541	0.0327869	0.533786
ACSBG1	0.363995	0.774135	0.587822	1	1	1	0.944022	0.439424	0.529388
ACSBG2	1.86337	0.290296	0.00763904	1	1	1	0.565374	0.567773	0.932027
ACSF2	2.79766	2.03964	0.556613	0.0643413	1	1	0.00011451	0.245502	0.00466258
ACSF3	0.559599	0.00611122	0.122303	1	1	1	0.196321	0.918832	0.806477
ACSL1	0.0273761	0.244618	0.267179	1	1	1	0.9996	0.538984	0.938824
ACSL3	2.5526	0.222496	3.14725e-05	0.0981402	1	1	0.000446082	0.59896	0.9988
ACSL5	3.11968	1.14353	1.15605	1	1	1	0.209916	0.257497	0.494202
ACSL6	0.457918	1.87754	0.0837214	1	1	1	0.134346	0.122351	0.761296
ACSM1	1.14659	1.11161	0.470788	0.88469	1	1	0.0107957	0.0783686	0.469412
ACSM2A	6.40559	0.367543	1.69453	0.0771699	1	1	0.000237242	0.283487	0.114754
ACSM2B	3.23431	2.1955	1.81907	0.315038	1	1	0.00332382	0.0107957	0.152739
ACSM3	0.00429268	0.176397	4.58855	1	1	1	0.898041	0.779288	0.0119952
ACSM4	0.653242	0.186845	0.360735	1	1	1	0.321072	0.736106	0.2487
ACSM5	1.48406	1.6519	0.883116	0.348292	1	1	0.00378329	0.157937	0.0267893
ACSS1	0.0379248	0.499751	1.66145	1	1	1	0.9988	0.366653	0.497801
ACSS2	0.238684	0.105008	1.47916	1	1	1	0.358257	0.821271	0.0439824
ACSS3	0.062796	0.0473461	0.00706871	1	1	1	0.520992	0.776489	0.920032
ACTA2	0.917395	3.59456	1.82846	1	1	1	0.663735	0.0187925	0.146341
ACTB	0.361627	0.606207	0.630063	1	1	1	0.90044	0.410636	0.727309
ACTC1	9.19657	0.961401	1.1673	0.0842834	1	1	0.000304396	0.126749	0.271491
ACTG2	0.0699724	1.7476	0.039076	1	0.436875	1	0.898041	0.000913292	0.718113
ACTL6A	1.72428	0.323629	1.13258	1	1	1	0.644142	0.558577	0.54898
ACTL8	3.36056	0.0261261	0.33968	0.189613	1	1	0.00158862	0.879648	0.253499
ACTN1	2.48494	0.0162113	0.253124	0.0469844	1	1	1.75487e-05	0.884446	0.119952
ACTN2	1.96424	0.211785	0.224743	1	1	1	0.341463	0.507397	0.181127
ACTN3	3.25963	0.197138	1.80094	1	1	1	0.128748	0.462615	0.234306
ACTN4	0.318527	0.00229754	0.00768274	1	1	1	0.419832	0.966014	0.916034
ACTR10	1.32001	0.0355779	0.60581	0.286859	1	1	0.00291866	0.978009	0.316273
ACTR1A	0.727184	0.602352	0.0370419	1	1	1	0.134746	0.329068	0.716513
ACTR2	2.58483	2.93848	0.0848885	0.0837995	1	1	0.000298991	0.14954	0.426629
ACTR3	2.55368	0.303695	0.339187	1	1	1	0.114354	0.519392	0.442623
ACTR3B	1.50335	0.00280393	0.011516	1	1	1	0.601759	0.962815	0.982007
ACTR5	1.6915	8.66929	0.0947651	1	1	1	0.257497	0.0151939	0.532587
ACTR6	1.71664	1.54868	0.49041	1	1	1	0.852459	0.0943623	0.839664
ACTR8	4.94674	1.8547	1.76758	1	1	1	0.0231907	0.252699	0.384246
ACTRT2	0.45957	0.0837495	0.0614321	1	1	1	0.0819672	0.77609	0.70052
ACVR1	3.24181	0.341131	1.57357	1	1	1	0.413035	0.389844	0.351459
ACVR1B	0.000107904	0.164298	0.391385	1	1	1	0.986006	0.485006	0.0803679
ACVR1C	0.279278	0.466549	0.217641	1	1	1	0.682127	0.544982	0.727709
ACVR2A	0.6057	0.160209	0.0231346	1	1	1	0.942823	0.548581	0.79888
ACVR2B	0.0319993	1.93771	0.0767207	1	1	1	0.901639	0.310276	0.640144
ACVRL1	0.0283852	0.0239105	0.503764	1	1	1	0.778489	0.889244	0.127949
ACY3	2.37089	4.03758	0.112294	1	1	1	0.289484	0.0795682	0.965614
ACYP1	6.19263	3.70554	0.381843	0.0541522	1	1	4.579e-05	0.0495802	0.363055
ACYP2	0.668165	6.0381	0.00937315	1	1	1	0.615354	0.0215914	0.92403
ADA	0.719043	2.12098	0.00333771	1	1	1	0.403439	0.236705	0.935626
ADAD1	1.47605	0.149443	0.625285	1	1	1	0.110756	0.753299	0.211116
ADAD2	1.7634	3.41705	0.551824	1	1	1	0.72371	0.0343863	0.632547
ADAM10	7.56457	0.0258599	0.00183057	0.184102	1	1	0.00151236	0.842863	0.953619
ADAM11	1.99893	0.0369637	0.442282	1	1	1	0.818073	0.782087	0.832867
ADAM12	0.190191	0.257693	0.106581	1	1	1	0.604958	0.151539	0.60016
ADAM15	6.26058	3.54813	0.0655484	0.077997	0.41174	1	0.000255024	0.000716671	0.661335
ADAM17	4.5217	0.000206	0.0478336	0.0487494	1	1	3.20818e-05	0.989604	0.863255
ADAM18	9.35941	2.43898	0.538723	0.058139	1	1	5.93448e-05	0.0815674	0.192323
ADAM19	0.827213	1.95945	0.199092	1	1	1	0.364654	0.184326	0.327469
ADAM2	0.384521	9.98198	0.0119833	1	0.516307	1	0.916833	0.00132367	0.87605
ADAM20	0.07082	1.31136	1.00974	1	1	1	0.787685	0.467413	0.162735
ADAM21	0.00203783	3.97001	0.823767	1	1	1	0.964814	0.0603759	0.182327
ADAM22	0.339697	0.0841587	0.0422977	1	1	1	0.417833	0.682527	0.82567
ADAM23	0.182295	3.63714	0.276427	1	1	1	0.703319	0.0239904	0.346261
ADAM28	3.62328	0.236734	0.857557	0.88469	1	1	0.0107957	0.496601	0.0891643
ADAM29	2.07635	0.788838	0.5153	1	1	1	0.113555	0.47421	0.569372
ADAM30	0.814334	3.30109	0.151979	1	0.379172	1	0.992003	0.000586233	0.285886
ADAM32	2.24231	0.607717	1.84688	1	1	1	0.714114	0.316673	0.692523
ADAM33	0.0186878	3.14454	0.000231882	1	1	1	0.95042	0.0579768	0.981607
ADAM5P	0.35825	0.318479	0.742841	1	1	1	0.0727709	0.316273	0.344262
ADAM7	0.680035	1.29629	2.80434e-05	1	1	1	0.146341	0.0319872	0.995602
ADAM8	0.0626749	0.257231	0.723595	1	1	1	0.109556	0.196321	0.330668
ADAM9	0.185643	0.122369	0.430518	1	1	1	0.966813	0.789284	0.980808
ADAMDEC1	0.0107879	0.886504	0.00820411	1	1	1	0.97441	0.211915	0.960016
ADAMTS1	0.0300777	0.00116392	0.204142	1	1	1	0.993603	0.969612	0.688525
ADAMTS10	4.93966	2.84782	0.00157172	0.236034	1	1	0.00222246	0.0267893	0.958017
ADAMTS12	0.530251	0.620071	0.641334	1	1	1	0.143143	0.508996	0.411435
ADAMTS13	0.368351	7.14656	0.00297912	1	1	1	0.621751	0.0147941	0.943623
ADAMTS14	1.57133	1.177	0.837983	0.164843	1	1	0.00123733	0.265894	0.0255898
ADAMTS15	1.89817	0.80969	1.94007	1	1	1	0.263894	0.412235	0.118752
ADAMTS16	0.0398569	0.120646	0.340583	1	1	1	0.847661	0.712115	0.12515
ADAMTS17	0.42858	1.07941	0.0396017	1	1	1	0.920032	0.266693	0.54978
ADAMTS18	0.0794954	0.80842	0.0257051	1	1	1	0.854058	0.670132	0.666133
ADAMTS19	0.674891	9.95266	0.731154	1	1	1	0.740104	0.009996	0.407437
ADAMTS2	0.0429186	0.202185	0.486963	1	1	1	0.993203	0.542583	0.327869
ADAMTS20	2.21866	7.83849	0.0881267	0.0700599	0.312036	1	0.000167361	0.000307091	0.297081
ADAMTS3	0.354561	0.226091	0.01125	1	1	1	0.0663735	0.351859	0.864854
ADAMTS4	2.94932	1.49222	0.344191	0.0785201	1	1	0.000261033	0.376649	0.365854
ADAMTS5	0.271932	0.868752	0.0856578	1	1	1	0.886046	0.304678	0.596961
ADAMTS6	2.32641	0.0285501	0.392907	1	1	1	0.611755	0.770092	0.758097
ADAMTS7	0.00779904	1.31953	0.33306	1	1	1	0.970012	0.661735	0.77369
ADAMTS8	1.29876	0.215501	1.32461	1	1	1	0.856857	0.621351	0.19952
ADAMTS9	0.297185	0.172889	0.215538	1	1	1	0.0663735	0.362655	0.489404
ADAMTSL1	0.0138706	0.233321	0.00597264	1	1	1	0.980808	0.57457	0.838865
ADAMTSL3	1.09509	0.000601577	0.271161	1	1	1	0.0927629	0.952019	0.823271
ADAMTSL4	1.70149	12.9172	0.0113881	1	1	1	0.393443	0.0195922	0.938425
ADAMTSL5	1.86127	0.662447	0.00371102	1	1	1	0.203519	0.441423	0.879648
ADAP1	0.0153802	1.60673	0.220052	1	1	1	0.786485	0.0851659	0.347461
ADAP2	2.18998	0.696318	1.35122	1	1	1	0.212715	0.541783	0.592563
ADAR	2.48173	0.982491	0.920666	1	1	1	0.554178	0.236306	0.380648
ADARB1	1.09134	0.122449	0.0302352	1	1	1	0.312275	0.786885	0.709316
ADARB2	0.101128	0.618351	0.0746078	1	1	1	0.973611	0.37505	0.42503
ADAT1	7.97683	0.384878	0.923945	1	1	1	0.0135946	0.233507	0.22551
ADAT2	1.37753	0.318621	0.122633	0.412071	1	1	0.0046661	0.59976	0.561375
ADAT3	1.73209	1.80888	0.150606	1	1	1	0.309876	0.0951619	0.663335
ADC	0.16468	0.549652	0.634637	1	1	1	0.505798	0.454618	0.260296
ADCK1	0.0780753	0.143151	0.0310637	1	1	1	0.988405	0.553379	0.832867
ADCK2	0.995985	3.88711	0.701396	1	1	1	0.967613	0.0287885	0.704518
ADCK4	0.96854	0.662627	0.843206	1	1	1	0.743303	0.12435	0.327069
ADCK5	0.489714	3.0327	0.0368057	1	1	1	0.391843	0.0759696	0.635346
ADCY1	0.137887	0.366021	0.215361	1	1	1	0.886845	0.659336	0.186725
ADCY10	0.19601	0.0907646	0.183459	1	1	1	0.984406	0.618952	0.828469
ADCY2	1.65481	0.234948	0.0026028	0.241137	1	1	0.00228492	0.545382	0.92403
ADCY3	3.10639	1.06536	0.363411	1	1	1	0.777289	0.0607757	0.958417
ADCY4	5.05202	5.07154	1.59666	0.160698	0.915747	1	0.00117846	0.00389503	0.229908
ADCY5	0.397572	1.39328	0.351179	1	1	1	0.244702	0.143543	0.542583
ADCY6	0.449333	1.14507	1.86702	1	1	1	0.971611	0.365454	0.455418
ADCY7	2.97002	1.58206	0.0121198	0.105758	1	1	0.000532873	0.0863654	0.830068
ADCY8	0.198651	0.00346782	0.37633	1	1	1	0.998001	0.929628	0.329068
ADCY9	0.718506	0.197671	0.506328	1	1	1	0.911635	0.697721	0.0995602
ADCYAP1	0.0953617	0.44995	0.0497089	1	1	1	0.67493	0.39904	0.666133
ADCYAP1R1	0.0049586	0.197506	0.674808	1	1	1	0.966813	0.538185	0.307077
ADD1	0.269685	0.108971	0.035356	1	1	1	0.614154	0.80008	0.886046
ADD2	0.107528	0.2884	0.17455	1	1	1	0.939624	0.423431	0.781287
ADD3	1.8171	0.281609	3.13249e-05	1	1	1	0.146741	0.680928	0.998001
ADFP	0.232105	0.154126	0.133623	1	1	1	0.280688	0.703718	0.722111
ADH1A	0.867767	0.804296	0.000112069	1	1	1	0.209916	0.364654	0.980008
ADH1B	1.7119	2.2275	0.0792293	0.0644739	1	1	0.000119752	0.0111955	0.658137
ADH1C	5.8348	1.93299	0.102672	0.0487494	1	1	2.85973e-05	0.0355858	0.736106
ADH4	7.33278	0.915824	0.569614	1	1	1	0.0295882	0.0187925	0.892043
ADH5	2.89703	2.4987	0.00346856	0.316374	1	1	0.00334421	0.0115954	0.868053
ADH6	3.49891	1.99811	0.409338	0.0840142	1	1	0.000301597	0.0463814	0.2503
ADH7	0.896507	0.0336516	0.989764	1	1	1	0.780488	0.82487	0.453419
ADHFE1	0.007548	0.409515	0.125061	1	1	1	0.978409	0.657337	0.402639
ADI1	1.75011	0.196921	0.546108	1	1	1	0.632947	0.511795	0.965614
ADIPOQ	2.98717	7.87126	0.00401484	1	1	1	0.216713	0.0243902	0.97561
ADIPOR1	0.188355	2.21521	0.0356083	1	1	1	0.494602	0.42583	0.694522
ADIPOR2	1.08847	1.06956	0.153363	1	0.801724	1	0.816873	0.00321853	0.639344
ADK	0.17279	0.141873	0.848678	1	1	1	0.37545	0.697721	0.431028
ADNP	1.8675	0.0787765	0.0059453	0.183247	1	1	0.00150169	0.755298	0.90044
ADNP2	0.0893787	1.94392	0.950351	1	1	1	0.768892	0.0791683	0.365454
ADORA1	0.0352813	5.01366	1.42611	1	0.41174	1	0.928029	0.000675646	0.0595762
ADORA2A	0.382201	0.34368	1.81981	1	1	1	0.855658	0.521391	0.253499
ADORA2B	1.08772	6.52399	0.60689	1	1	1	0.45062	0.0111955	0.687725
ADORA3	0.0214422	0.254133	0.0219177	1	1	1	0.992003	0.814474	0.787685
ADPGK	1.24515	1.38944	0.435023	0.0584796	1	1	6.51788e-05	0.262695	0.289884
ADPRHL1	0.699114	3.82658	0.0321689	1	1	1	0.292683	0.112355	0.795282
ADRA1A	1.93277	3.42959	0.0745501	0.0871932	1	1	0.00032976	0.029988	0.688525
ADRA1B	0.045736	0.0931603	0.00149928	1	1	1	0.940424	0.702919	0.927629
ADRA1D	1.32532	0.105829	0.213041	1	1	1	0.0419832	0.766094	0.387045
ADRB2	0.113264	1.20565	0.55973	1	1	1	0.653339	0.730908	0.429428
ADRBK2	0.398623	6.72628	0.844968	1	1	1	0.790084	0.069972	0.546581
ADSS	9.596	0.916784	1.09269	0.0661073	1	1	0.000127716	0.30068	0.392643
ADSSL1	1.46364	0.213813	0.0177659	1	1	1	0.09996	0.570572	0.818073
AEBP1	0.16607	0.478989	0.373632	1	1	1	0.635346	0.44982	0.660536
AEBP2	0.000111001	1.6329	1.97134	1	1	1	0.978009	0.017593	0.196721
AEN	0.166016	0.151451	0.00589412	1	1	1	0.82447	0.720112	0.930428
AES	0.311195	0.113013	1.13186	1	1	1	0.902439	0.743303	0.2499
AFAP1	7.02627	2.05214	0.696852	0.111841	1	1	0.000607802	0.0107957	0.434226
AFAP1L1	0.318139	0.0490632	1.01279	1	1	1	0.987205	0.885246	0.535786
AFAP1L2	0.981373	0.298016	0.052683	1	1	1	0.930028	0.518593	0.998001
AFF1	1.18906	0.580916	0.0384012	1	1	1	0.833666	0.394242	0.919632
AFF3	0.958784	2.36557	0.716258	1	1	1	0.930428	0.0271891	0.448221
AFF4	5.44337	0.405976	0.156944	0.0487494	1	1	3.21243e-05	0.806078	0.443423
AFG3L1	0.726397	1.77349	0.020775	1	1	1	0.186725	0.22391	0.839264
AFG3L2	0.522377	0.00250399	0.436552	1	1	1	0.620952	0.962415	0.218712
AFM	1.67931	2.69103	0.915632	1	1	1	0.54938	0.0507797	0.14874
AFMID	1.67025	0.550678	0.356284	1	1	1	0.183926	0.29988	0.695722
AFP	0.0212518	4.09787	2.30509	1	1	1	0.944822	0.0307877	0.0151939
AFTPH	0.936916	1.18861	0.209799	1	1	1	0.260696	0.0407837	0.455418
AGA	0.101479	6.20318	0.507096	1	1	1	0.869252	0.0107957	0.17593
AGAP1	0.352015	0.0439183	0.263112	1	1	1	0.996002	0.760896	0.502599
AGAP11	0.712307	0.414353	2.3562	0.230765	1	1	0.00213917	0.462215	0.000262626
AGAP2	1.80965	0.0152473	0.236519	0.164208	1	1	0.00122363	0.793682	0.390644
AGAP3	0.122684	2.09317	0.470663	1	1	1	0.633746	0.0779688	0.305478
AGBL1	0.0448011	0.0253081	0.0910219	1	1	1	0.947221	0.909236	0.473411
AGBL2	0.20819	0.28253	0.387628	1	1	1	0.497001	0.565774	0.52419
AGBL4	3.3314	0.742098	0.00753956	0.155743	1	1	0.00110992	0.277089	0.832067
AGBL5	1.37648	0.00274968	0.0129187	1	1	1	0.017593	0.958017	0.87485
AGER	0.190002	0.179923	2.57832	1	1	1	0.828869	0.381847	0.0379848
AGFG1	1.19231	6.59707	1.07658	1	1	1	0.572571	0.0111955	0.592563
AGFG2	0.266949	0.953746	0.815486	1	1	1	0.708517	0.265894	0.427029
AGGF1	0.277156	1.46292	0.572165	1	1	1	0.582967	0.296281	0.240704
AGK	0.52816	2.35708	0.0243475	1	1	1	0.876849	0.097561	0.922031
AGL	0.908881	0.850582	1.0282	1	1	1	0.958816	0.716114	0.00103784
AGMAT	1.17588	0.0329242	1.53114	1	1	1	0.753698	0.903239	0.665734
AGPAT1	0.212747	0.697563	0.900482	1	1	1	0.507397	0.432627	0.19872
AGPAT2	0.334273	20.4474	0.000478538	1	1	1	0.853658	0.00535722	0.990804
AGPAT3	1.34734	0.78623	0.0205077	1	1	1	0.814474	0.442223	0.854058
AGPAT4	0.158123	0.472214	0.252089	1	1	1	0.969612	0.395042	0.878848
AGPAT5	0.943917	1.14938	0.457074	1	1	1	0.591763	0.127949	0.213115
AGPAT6	0.127023	0.738999	1.50782	1	1	1	0.467813	0.10076	0.0131947
AGPAT9	0.935851	0.882155	1.51795	1	1	1	0.459416	0.393043	0.0735706
AGPS	0.442843	0.261031	0.287901	1	1	1	0.839264	0.332667	0.658137
AGR2	0.0493212	0.571756	0.535632	1	1	1	0.826469	0.377449	0.322271
AGR3	0.736828	0.691872	1.94161	1	1	1	0.516993	0.471411	0.0171931
AGT	1.12458	0.213533	1.07952	1	1	1	0.270292	0.356657	0.437825
AGTPBP1	4.47055	0.0946574	0.207424	1	1	1	0.0155938	0.538585	0.594562
AGTR1	0.842784	0.106916	0.179256	1	1	1	0.9992	0.529388	0.9996
AGTRAP	0.312969	0.142261	0.754287	1	1	1	0.992803	0.57377	0.979608
AGXT	0.0308141	0.0901751	0.650751	1	1	1	0.718113	0.740904	0.214314
AGXT2	1.07125	0.27383	0.0151881	1	1	1	0.0567773	0.429428	0.816473
AGXT2L1	11.4739	1.8414	0.0105602	0.0539551	1	1	4.21565e-05	0.0227909	0.786485
AGXT2L2	1.43576	0.155929	0.00513149	1	1	1	0.844862	0.655338	0.813275
AHCTF1	0.631561	0.0363202	0.977076	1	1	1	0.72571	0.826469	0.440224
AHCY	2.71273	0.748115	1.29449	1	1	1	0.497801	0.318672	0.946421
AHCYL1	2.05129	1.37656	0.888223	1	1	1	0.497001	0.281887	0.244702
AHCYL2	0.178807	0.760649	0.182202	1	1	1	0.97401	0.112755	0.678928
AHI1	3.51927	1.1608	0.59435	1	1	1	0.420632	0.0991603	0.580968
AHNAK	0.528631	0.422988	0.585802	1	1	1	0.992003	0.119952	0.512995
AHNAK2	2.11148	0.917331	0.00510434	1	1	1	0.0139944	0.461415	0.860856
AHR	0.188184	0.252118	0.0488939	1	1	1	0.933227	0.39904	0.622551
AHRR	0.101314	0.072044	1.47345	1	1	1	0.938425	0.729708	0.415834
AHSA1	0.835948	1.03311	0.0938548	1	1	1	0.652139	0.109556	0.9988
AHSA2	0.617509	1.3316	0.0315026	1	1	1	0.277489	0.256298	0.771292
AHSG	0.415725	3.23704	1.07252	1	1	1	0.310276	0.227509	0.231507
AICDA	0.864546	0.84556	0.575038	1	1	1	0.508597	0.287085	0.276289
AIF1	0.318299	0.00563368	2.68751	1	1	1	0.089964	0.889644	0.131947
AIF1L	0.0717927	8.6587	0.0347616	1	1	1	0.682127	0.0227909	0.69932
AIFM2	0.00367067	0.484995	0.0103765	1	1	1	0.891643	0.19912	0.802879
AIFM3	0.0118505	0.371259	0.0517715	1	1	1	0.953619	0.59896	0.935626
AIG1	0.801971	0.161137	0.133935	1	1	1	0.0539784	0.678129	0.439024
AIM1	0.0548541	0.325415	0.586178	1	1	1	0.960816	0.787285	0.333067
AIM1L	0.589136	0.0104645	0.268305	1	1	1	0.489004	0.943223	0.360256
AIM2	0.162332	1.37231	0.804555	1	1	1	0.504598	0.132347	0.119552
AIP	0.00695016	0.0695565	0.547251	1	1	1	0.951619	0.706517	0.284686
AIPL1	0.199724	2.52609	0.428562	1	1	1	0.611755	0.202319	0.310676
AIRE	0.0396686	0.0100167	0.303664	1	1	1	0.80048	0.87605	0.327869
AJAP1	4.40829	0.968311	0.446214	0.0618405	1	1	8.94554e-05	0.471012	0.135546
AK1	0.425496	0.00223046	0.0132731	1	1	1	0.770892	0.947221	0.884846
AK2	1.5027	0.341184	2.76385	1	1	1	0.59976	0.301879	0.130748
AK3	0.265536	0.789628	0.507836	1	1	1	0.941623	0.29868	0.540184
AK3L1	0.25215	0.127057	0.0441972	1	1	1	0.243902	0.782887	0.72531
AK5	0.300602	1.91812	0.382749	1	1	1	0.969212	0.257497	0.353059
AK7	0.356015	0.32138	0.117773	1	1	1	0.853658	0.398241	0.830468
AKAP1	0.0468437	1.10017	0.00300938	1	1	1	0.97441	0.280288	0.965214
AKAP10	0.055414	0.404786	0.144936	1	1	1	0.9996	0.344662	0.998401
AKAP11	1.00328	3.51349	0.321804	1	1	1	0.584966	0.0839664	0.812475
AKAP12	0.0405924	2.07744	0.0912262	1	0.512714	1	0.95042	0.00124362	0.553778
AKAP13	1.12967	0.529109	0.167942	1	1	1	0.0707717	0.367853	0.604558
AKAP2	1.7715	0.00610588	0.0244728	1	1	1	0.0655738	0.916433	0.853658
AKAP3	0.612275	0.781658	1.24192	1	1	1	0.0579768	0.443423	0.193523
AKAP5	1.69741	1.71146	0.609909	0.327329	1	1	0.00350128	0.147941	0.267493
AKAP6	0.291308	0.46624	0.0333962	1	1	1	0.558577	0.336265	0.497001
AKAP7	0.6691	0.0999518	0.110574	1	1	1	0.212715	0.732507	0.678529
AKAP8L	0.0309592	0.0843839	0.439288	1	1	1	0.998401	0.714114	0.782087
AKAP9	1.04063	0.0831473	0.014208	1	1	1	0.0471811	0.820072	0.95042
AKIRIN1	0.200976	0.00170684	1.43772	1	1	1	0.651339	0.971611	0.327469
AKIRIN2	1.40016	2.04128	0.186287	1	1	1	0.776889	0.139544	0.651739
AKNA	0.818143	1.77038	0.0108596	1	1	1	0.968413	0.0211915	0.832467
AKR1A1	1.36738	1.24217	0.280335	0.93447	1	1	0.0115954	0.377049	0.760496
AKR1B1	9.83701	1.10209	1.99283	0.109122	1	1	0.000581443	0.12555	0.027589
AKR1B10	1.95535	0.0149937	0.165884	1	1	1	0.393043	0.896841	0.694922
AKR1B10L	0.000612653	1.37413	1.7004	1	1	1	0.996401	0.4994	0.0331867
AKR1C1	0.85692	0.0228582	0.22779	1	1	1	0.472611	0.872451	0.888445
AKR1C2	0.703069	0.0419107	0.0295344	1	1	1	0.842063	0.794082	0.862455
AKR1C3	1.73656	0.0021193	0.10097	0.0877221	1	1	0.000337609	0.966014	0.59976
AKR1C4	0.00105882	5.60939	0.00539958	1	0.300662	1	0.97601	0.000236892	0.916034
AKR1CL2	0.866883	3.0999	2.15516	1	1	1	0.687725	0.0851659	0.0435826
AKR1D1	0.170369	1.41856	2.14414	1	1	1	0.890444	0.109156	0.00443186
AKR7A2	1.17942	0.0119791	0.829895	1	1	1	0.678529	0.927629	0.255898
AKR7A3	0.900405	7.94768	0.18971	1	1	1	0.506997	0.0835666	0.827269
AKT1	5.00279	4.72206	6.92536e-05	0.132411	0.590339	1	0.000824146	0.00183718	0.991603
AKT1S1	0.167624	1.12834	0.73354	1	1	1	0.763694	0.396241	0.167933
AKT2	2.5623	1.46331	0.391248	1	1	1	0.218313	0.17473	0.654938
AKT3	1.17016	0.917403	1.19062	1	1	1	0.268293	0.335066	0.107957
AKTIP	0.724575	2.36359	0.0988311	1	1	1	0.0371851	0.315074	0.760896
ALAD	0.110842	0.460331	1.37246	1	1	1	0.998001	0.311475	0.00300569
ALAS1	0.0308747	0.11764	0.00613228	1	1	1	0.688125	0.616154	0.886445
ALB	0.507655	1.50299	0.867548	1	1	1	0.486205	0.14994	0.0511795
ALCAM	0.28378	0.358998	0.0650729	1	1	1	0.863255	0.636945	0.844862
ALDH16A1	2.75081	1.90006	0.0062964	0.0599392	1	1	7.83529e-05	0.0227909	0.947221
ALDH18A1	0.0561897	0.0314327	0.0660494	1	1	1	0.856058	0.856457	0.542183
ALDH1A1	0.597607	0.863254	0.0184271	1	1	1	0.943223	0.271491	0.953219
ALDH1A2	1.25155	2.02125	0.391831	1	1	1	0.383447	0.0551779	0.37385
ALDH1A3	1.38777	0.013251	0.0565673	0.139803	1	1	0.000923467	0.858057	0.713315
ALDH1B1	1.22529	1.17096	0.064115	1	1	1	0.27589	0.383846	0.782487
ALDH1L1	0.370109	1.1383	0.202286	1	1	1	0.797681	0.0659736	0.654538
ALDH1L2	0.549441	0.342855	0.717508	1	1	1	0.113155	0.363854	0.218712
ALDH2	6.41371	0.662318	0.961869	1	1	1	0.0319872	0.418632	0.207917
ALDH3A1	0.0285448	0.135631	0.743029	1	1	1	0.985206	0.52379	0.55058
ALDH3A2	1.03778	1.92155	0.105892	1	0.41174	1	0.0207917	0.000719987	0.570172
ALDH3B1	2.61754	2.08791	0.0520541	1	1	1	0.321471	0.307477	0.780088
ALDH3B2	0.140094	3.69343	1.89719e-07	1	1	1	0.7493	0.120352	0.9992
ALDH4A1	0.246639	0.18989	0.666327	1	1	1	0.958417	0.761296	0.732507
ALDH5A1	0.359429	0.675243	1.20382	1	1	1	0.215914	0.319472	0.0635746
ALDH6A1	0.187863	2.346	0.00488703	1	1	1	0.307077	0.147141	0.917233
ALDH7A1	0.465333	0.0230344	0.38648	1	1	1	0.992803	0.798081	0.94922
ALDH8A1	0.163005	0.939094	0.445062	1	1	1	0.346261	0.407837	0.22511
ALDH9A1	7.17092	2.25637	0.354944	0.0855748	1	1	0.000319124	0.558177	0.490604
ALDOA	0.0648159	1.37585	0.00108656	1	1	1	0.998401	0.252699	0.998001
ALDOB	0.0247269	0.0773593	2.33428	1	1	1	0.89924	0.853259	0.19912
ALG1	1.12441	0.140444	0.363556	1	1	1	0.0887645	0.721711	0.266293
ALG10	0.206011	0.114103	0.0238999	1	1	1	0.984806	0.730108	0.842863
ALG11	0.513937	0.814816	0.384729	1	1	1	0.642543	0.363055	0.148341
ALG12	2.30008	2.47002	0.137154	1	1	1	0.809276	0.0515794	0.994002
ALG14	2.33638	1.63638	0.0753959	0.189166	1	1	0.00158112	0.169532	0.536985
ALG5	0.449653	0.391855	0.00134544	1	1	1	0.954018	0.630148	0.979208
ALG6	0.413869	0.305757	0.0169258	1	1	1	0.728908	0.465814	0.896841
ALG8	0.327506	1.60244	0.0271128	1	1	1	0.932027	0.203918	0.691323
ALG9	0.254394	0.510424	1.32114	1	1	1	0.961615	0.27589	0.293083
ALK	0.193253	0.369161	0.0752349	1	1	1	0.987605	0.362655	0.988005
ALKBH1	0.449139	0.0128437	0.155618	1	1	1	0.326269	0.793682	0.719312
ALKBH3	0.305442	0.969139	0.456227	1	1	1	0.708117	0.155138	0.407437
ALKBH4	0.0762689	4.67428	2.38305e-05	1	1	1	0.647741	0.0435826	0.996401
ALKBH5	7.07747	4.50829	0.00687749	0.0583012	0.36708	1	6.18977e-05	0.000553678	0.904038
ALKBH8	1.52379	0.00930056	0.0440531	1	1	1	0.0167933	0.89884	0.684526
ALLC	0.501593	0.0369575	0.408717	1	1	1	0.994802	0.760496	0.940024
ALMS1	0.561119	0.174917	0.891102	1	1	1	0.966813	0.631347	0.7509
ALMS1P	1.73633	0.203361	1.52117	1	1	1	0.69932	0.612555	0.681327
ALOX12	0.0737285	1.22025	0.0156396	1	1	1	0.718513	0.160736	0.870852
ALOX12B	0.979003	1.39041	1.89825	1	1	1	0.606158	0.0779688	0.0115954
ALOX12E	1.38958	0.00412841	0.527255	1	1	1	0.797281	0.922831	0.938824
ALOX15	2.15798	0.218198	0.249375	1	1	1	0.454218	0.541383	0.733706
ALOX15B	0.104495	2.08662	0.329219	1	1	1	0.702119	0.128748	0.464214
ALOX5	0.100575	0.0126482	0.465992	1	1	1	0.953619	0.944022	0.490604
ALOX5AP	1.87736	0.398445	6.27584e-05	1	1	1	0.691323	0.55058	0.986006
ALOXE3	0.377335	0.131989	0.185634	1	1	1	0.32587	0.821271	0.381447
ALPI	0.663924	0.84341	0.070331	1	1	1	0.245502	0.395842	0.539384
ALPK1	0.155967	0.412578	0.144172	1	1	1	0.941223	0.658137	0.476209
ALPK2	0.0191499	0.0131073	0.319069	1	1	1	0.978808	0.938425	0.629748
ALPK3	1.47116	0.057786	2.40928	0.910033	1	1	0.0111955	0.756098	0.297481
ALPL	0.312825	0.219989	0.368724	1	1	1	0.345862	0.541783	0.222711
ALS2	0.00672552	0.263473	0.259616	1	1	1	0.919232	0.62575	0.209916
ALS2CL	1.91375	0.0855557	0.00443681	1	1	1	0.668533	0.733307	0.979608
ALS2CR11	0.331312	1.59506	1.20823	1	1	1	0.79928	0.0843663	0.328269
ALS2CR12	0.600627	2.11198	0.340352	1	1	1	0.807277	0.0455818	0.146341
ALS2CR4	1.27053	2.57881	0.269498	1	1	1	0.0151939	0.0667733	0.368652
ALS2CR8	1.33304	0.0560909	3.02374	0.304682	1	1	0.00318019	0.64894	0.0447821
ALX1	2.64	1.88188	2.7158	1	1	1	0.562575	0.329068	0.0627749
ALX3	0.0651888	0.184358	0.00993601	1	1	1	0.738505	0.645742	0.871251
ALX4	1.12227	0.00499795	0.00365363	1	1	1	0.880048	0.919232	0.886445
AMAC1	6.69023	1.15605	0.10231	0.956464	1	1	0.0119952	0.0715714	0.872051
AMACR	0.62962	13.1815	0.0737194	1	1	1	0.733706	0.009996	0.734106
AMBN	0.4398	1.62878	0.959796	1	1	1	0.430228	0.162335	0.222311
AMBP	2.24081	1.43043	0.405982	0.106662	1	1	0.000542798	0.164734	0.327469
AMBRA1	2.18227	0.971154	1.89686	1	1	1	0.928429	0.231507	0.697321
AMD1	0.685891	1.32867	0.115643	1	1	1	0.0707717	0.216713	0.720512
AMDHD1	0.512861	3.3395	0.873206	1	1	1	0.346661	0.0763695	0.0363854
AMFR	0.934882	2.05599	0.183974	1	1	1	0.939624	0.0663735	0.922031
AMH	0.13145	0.110357	0.461242	1	1	1	0.536585	0.715714	0.501399
AMHR2	0.00263907	0.000841577	0.0300258	1	1	1	0.968413	0.987205	0.615754
AMICA1	2.21258	3.59967	0.00125091	1	1	1	0.308676	0.0583767	0.997201
AMIGO2	0.680699	1.46075	1.19066	1	1	1	0.17393	0.129948	0.00238374
AMMECR1L	0.557211	0.0729633	0.0310967	1	1	1	0.993203	0.641343	0.842063
AMN	0.873791	0.150922	1.28413	1	1	1	0.943623	0.664934	0.716114
AMN1	2.68592	0.682403	2.21266	1	1	1	0.0179928	0.509396	0.370652
AMOTL1	0.00304477	0.764583	0.718272	1	1	1	0.926829	0.203119	0.209516
AMOTL2	3.79674	2.24042	1.33702	0.072489	1	1	0.000192883	0.139544	0.0131947
AMPD1	1.03858	0.863086	0.515778	1	1	1	0.0191923	0.612555	0.133147
AMPD2	5.83066	0.595788	0.328552	0.0644739	1	1	0.000121929	0.0551779	0.994402
AMPD3	0.139369	3.35872	1.30899	1	1	1	0.832467	0.0387845	0.0951619
AMPH	0.80989	1.13669	0.176568	1	1	1	0.115954	0.520192	0.365854
AMTN	0.0419397	2.75646	0.000786645	1	1	1	0.784486	0.10076	0.969612
AMY2B	0.77433	0.94389	0.322766	1	1	1	0.433827	0.0887645	0.696122
AMZ1	0.0463652	1.25737	0.260323	1	1	1	0.997601	0.143942	0.912435
AMZ2	0.000333152	0.0468326	0.183276	1	1	1	0.987205	0.834866	0.403838
ANAPC1	0.400505	1.43646	0.240505	1	1	1	0.803279	0.280688	0.279888
ANAPC10	0.0650255	0.409818	0.0795616	1	1	1	0.940024	0.486205	0.687725
ANAPC4	3.01278	0.160546	0.316989	1	1	1	0.0487805	0.507797	0.426629
ANAPC5	1.99753	0.827823	0.439816	1	1	1	0.32467	0.580568	0.95082
ANG	0.691649	0.746251	0.00995619	1	1	1	0.759696	0.414234	0.844462
ANGEL1	0.203353	0.489189	1.52488	1	1	1	0.62455	0.487405	0.0483807
ANGEL2	1.17382	0.0888595	0.252206	1	1	1	0.808077	0.7489	0.87405
ANGPT1	0.091249	1.38206	0.715849	1	1	1	0.946022	0.009996	0.638545
ANGPT2	1.04943	0.972887	0.0212786	1	1	1	0.783686	0.346661	0.873251
ANGPT4	0.452201	0.143131	0.0207982	1	1	1	0.952819	0.39984	0.642543
ANGPTL1	0.0329022	0.00572496	1.24982	1	1	1	0.686125	0.92563	0.0771691
ANGPTL2	0.950294	0.32221	0.412685	1	1	1	0.510196	0.321072	0.228708
ANGPTL4	4.78889	4.04079	0.127627	0.10547	0.76807	1	0.00052909	0.00293053	0.327469
ANGPTL5	4.07405	2.27305	2.28024	0.114684	1	1	0.000633144	0.271092	0.0983607
ANGPTL6	0.0130339	1.54171	0.221532	1	1	1	0.708517	0.142743	0.984806
ANK1	0.172241	1.40304	0.0139416	1	1	1	0.918433	0.119552	0.902839
ANK2	0.0105725	0.497124	0.0412429	1	1	1	0.994802	0.363854	0.62535
ANK3	1.30566	1.02077	0.57888	0.134152	1	1	0.00085566	0.351459	0.255098
ANKAR	3.80695	2.29664	0.337012	1	1	1	0.22551	0.0451819	0.918433
ANKDD1A	0.473689	0.377799	0.104183	1	1	1	0.82607	0.335866	0.979208
ANKFN1	0.11404	0.0435504	0.449973	1	1	1	0.965214	0.768493	0.197121
ANKFY1	0.648572	0.0672602	0.918783	1	1	1	0.877649	0.718912	0.241104
ANKH	0.0136842	0.290188	1.52265	1	1	1	0.995202	0.903239	0.00226523
ANKHD1	0.297377	0.18316	0.0879606	1	1	1	0.991603	0.563774	0.914034
ANKHD1-EIF4EBP3	0.297377	0.18316	0.0879606	1	1	1	0.987605	0.578169	0.914034
ANKIB1	1.70782	0.000724629	0.024691	0.623656	1	1	0.00739515	0.97601	0.817673
ANKK1	7.20072	1.9564	0.271302	0.182859	1	1	0.00149418	0.0227909	0.644542
ANKLE1	5.401	0.43596	0.0352765	0.08891	1	1	0.000353664	0.666933	0.657737
ANKLE2	0.558452	0.00296275	0.776144	1	1	1	0.466613	0.953619	0.0855658
ANKMY1	0.551727	3.50589	1.11521	1	1	1	0.398641	0.0379848	0.017593
ANKMY2	0.00528911	0.231709	0.408156	1	1	1	0.977609	0.788085	0.459816
ANKRA2	0.172904	1.06602	2.38343	1	1	1	0.84886	0.261495	0.00242187
ANKRD1	0.350132	0.0778497	0.699986	1	1	1	0.538585	0.85046	0.403439
ANKRD10	2.06039	3.65997	0.0281743	0.146177	1	1	0.00100294	0.0283886	0.707317
ANKRD11	1.77207	1.51473	0.251055	1	1	1	0.0155938	0.187525	0.567773
ANKRD12	2.00823	0.0036463	0.000402511	1	1	1	0.515394	0.956817	0.94922
ANKRD13B	0.839705	2.64919	0.00480931	1	1	1	0.2499	0.107157	0.904038
ANKRD13C	0.00145208	0.0405868	1.10467	1	1	1	0.993203	0.926429	0.240304
ANKRD16	0.826199	2.18804	0.00394874	1	1	1	0.166333	0.0127949	0.970812
ANKRD17	0.664894	0.352848	0.744954	1	1	1	0.986006	0.410236	0.484206
ANKRD2	0.0477141	1.2974	0.367477	1	1	1	0.696122	0.243503	0.0979608
ANKRD20B	1.05946	0.240397	0.288485	1	1	1	0.581767	0.54898	0.487005
ANKRD22	1.03567	0.0233411	1.02749	1	1	1	0.937225	0.857257	0.884446
ANKRD24	0.334534	0.150849	0.00171838	1	1	1	0.729308	0.612955	0.985206
ANKRD26	0.00650938	0.0069252	1.14297	1	1	1	0.918433	0.942823	0.383846
ANKRD27	0.965415	0.520055	0.00290603	1	1	1	0.671731	0.668533	0.942023
ANKRD28	0.0426565	1.48767	0.403116	1	1	1	0.983607	0.105158	0.365054
ANKRD29	0.407627	0.191842	0.00491723	1	1	1	0.0627749	0.444622	0.97561
ANKRD30A	0.0241237	0.00123891	0.0343647	1	1	1	0.913235	0.94962	0.801679
ANKRD32	1.45079	1.96619	1.74275	1	1	1	0.189524	0.0951619	0.0171931
ANKRD33	0.0210555	0.0426579	0.202665	1	1	1	0.840464	0.756497	0.489404
ANKRD35	0.0221047	0.136327	0.0209801	1	1	1	0.917633	0.664534	0.77489
ANKRD36B	0.00321135	1.54739	3.92864	1	1	1	0.958816	0.105958	0.193123
ANKRD40	0.337457	4.44699	0.67986	1	1	1	0.34986	0.0159936	0.368253
ANKRD42	0.408451	0.436441	0.360059	1	1	1	0.997601	0.339064	0.651739
ANKRD44	2.14447	0.0499782	1.53926	1	1	1	0.82567	0.77609	0.596162
ANKRD45	0.444242	0.456098	0.0826756	1	1	1	0.996801	0.45102	0.654138
ANKRD46	1.54004	0.434058	1.95431	0.226375	1	1	0.00208503	0.384246	0.0151939
ANKRD5	3.49423	0.256264	0.0728342	0.0539551	1	1	3.91916e-05	0.753698	0.704518
ANKRD50	0.392918	1.97524	3.69116	1	1	1	0.110756	0.167133	0.0367853
ANKRD53	0.00139982	0.999183	0.968051	1	1	1	0.912035	0.272691	0.362255
ANKRD55	0.547326	0.882512	0.00709318	1	1	1	0.347461	0.222311	0.82447
ANKRD56	0.104227	4.52325	0.480815	1	1	1	0.682127	0.0467813	0.221112
ANKRD6	0.0932832	0.482193	0.212734	1	1	1	0.803678	0.562575	0.492603
ANKRD7	0.0730752	0.654571	0.118851	1	1	1	0.811675	0.397841	0.616953
ANKS1A	0.29788	0.864802	0.667615	1	1	1	0.968812	0.0767693	0.244702
ANKS1B	0.0266649	0.47493	0.051456	1	1	1	0.998001	0.465414	0.817673
ANKS3	0.0101194	1.76995	1.38684	1	1	1	0.994002	0.171531	0.0559776
ANKS4B	0.454768	0.000361005	0.0935841	1	1	1	0.185126	0.978009	0.562575
ANKS6	0.114728	0.00332551	0.0671915	1	1	1	0.521791	0.962015	0.79968
ANKZF1	0.0145454	0.126123	0.527287	1	1	1	0.736505	0.940424	0.611355
ANLN	0.262182	0.332506	0.638912	1	1	1	0.654538	0.526589	0.339464
ANO1	0.110107	0.090952	0.064038	1	1	1	0.985606	0.79888	0.645742
ANO10	0.0210465	1.33764	0.135942	1	1	1	0.995202	0.0603759	0.87405
ANO2	0.00583268	0.00547599	0.0164976	1	1	1	0.9996	0.896841	0.912435
ANO3	1.17042	0.674097	0.224424	1	1	1	0.901639	0.487005	0.0903638
ANO4	0.779529	0.398341	0.218819	1	1	1	0.868453	0.507797	0.291883
ANO5	4.00084	2.33529	0.179348	0.10548	1	1	0.000530178	0.0627749	0.284286
ANO6	0.799217	2.13811	0.244718	1	1	1	0.0419832	0.0447821	0.496201
ANO7	4.51852	0.541006	0.0740152	0.077997	1	1	0.000251887	0.466613	0.348261
ANO8	0.943579	0.729422	0.00385575	1	1	1	0.393043	0.385046	0.968013
ANO9	2.5148	1.24979	4.23238	0.0751805	1	1	0.00021501	0.387845	0.0263894
ANP32A	6.15261	0.540998	1.24953	0.285825	1	1	0.00288095	0.435026	0.0203918
ANPEP	0.897348	0.4671	0.730142	1	1	1	1	0.297081	0.967613
ANTXR1	0.00241731	1.31726	0.0261563	1	1	1	0.982007	0.0279888	0.764894
ANTXR2	2.8129	3.15177	0.011052	0.0391342	0.356269	1	8.30968e-06	0.000486994	0.968013
ANTXRL	6.43152e-05	0.174496	0.849201	1	1	1	0.9988	0.532987	0.247101
ANXA1	3.00309	2.84317	0.0394734	0.153802	1	1	0.00108951	0.017593	0.641343
ANXA10	1.798	0.169408	1.08401e-05	0.200983	1	1	0.00172172	0.530588	0.995202
ANXA11	0.000448877	1.04322	0.0581955	1	1	1	0.996801	0.254698	0.830468
ANXA13	0.393227	3.20814	0.0126497	1	1	1	0.842063	0.00476664	0.851259
ANXA2	0.316876	0.882931	0.00587615	1	1	1	0.930828	0.365454	0.912435
ANXA2P3	0.115253	0.871681	0.556914	1	1	1	0.984806	0.234706	0.756098
ANXA3	0.506011	4.51082	0.754576	1	1	1	0.602559	0.0759696	0.408237
ANXA4	1.29689	0.815944	0.00487864	0.0928661	1	1	0.000391915	0.0839664	0.897241
ANXA5	1.92313	0.207689	1.02015	1	1	1	0.829268	0.272691	0.445822
ANXA6	0.0802555	0.91962	0.808496	1	1	1	0.986405	0.416633	0.107157
ANXA7	0.205751	13.4541	0.416516	1	1	1	0.45062	0.00841324	0.271092
ANXA9	0.138411	0.0047024	0.440482	1	1	1	0.630148	0.944022	0.497401
AOAH	0.107456	3.30598	0.393354	1	1	1	0.988405	0.0479808	0.545782
AOC2	1.85947	2.87975	0.0332	1	1	1	0.0447821	0.0555778	0.669732
AOC3	3.65651	10.5396	0.84087	1	1	1	0.0851659	0.0547781	0.684126
AOF1	0.195036	0.291403	0.0343096	1	1	1	0.830068	0.493003	0.807277
AOF2	0.291929	0.00621585	0.0432095	1	1	1	0.65054	0.946022	0.887245
AOX1	6.42096	0.69871	1.29332	0.119428	1	1	0.000677565	0.409036	0.0931627
AOX2	1.37424	0.120738	0.104233	1	1	1	0.0627749	0.532587	0.512195
AP1B1	3.51967e-06	1.17345	2.05574	1	1	1	0.997601	0.584566	0.0451819
AP1G1	1.91803	0.0655887	0.740546	0.391969	1	1	0.00438778	0.818873	0.203918
AP1G2	0.836589	1.73731	0.301088	1	1	1	0.954418	0.286285	0.388645
AP1GBP1	0.121722	1.62278	0.114498	1	1	1	0.465014	0.0371851	0.546581
AP1M1	0.00283427	7.23961	0.00519164	1	0.300662	1	0.966813	0.000148365	0.860056
AP1M2	0.313494	0.196011	0.0289261	1	1	1	0.167933	0.718513	0.890444
AP1S1	0.642099	1.45732	2.03534	1	1	1	0.27589	0.45022	0.334266
AP1S3	5.50831	2.07493	0.285765	1	0.514027	1	0.0155938	0.00128336	0.354258
AP2A1	0.0312456	6.95347	0.277066	1	1	1	0.909236	0.0139944	0.32507
AP2A2	0.0557942	1.37287	0.14091	1	1	1	0.4994	0.158337	0.730908
AP2B1	1.00435	0.286927	2.38346	1	1	1	0.327869	0.752099	0.0355858
AP2M1	0.336086	1.91388	0.271522	1	1	1	0.956018	0.273091	0.180728
AP2S1	0.78699	0.739269	0.317426	1	1	1	0.489804	0.129548	0.819672
AP3B1	0.701506	4.50735	2.24244	1	1	1	0.479408	0.042383	0.029988
AP3B2	0.385359	2.65377	0.261464	1	1	1	0.859656	0.0415834	0.817273
AP3D1	0.260772	0.471857	0.995631	1	1	1	0.728509	0.436625	0.30028
AP3M1	0.00481474	2.4253	1.15786	1	1	1	0.919632	0.257897	0.134746
AP3M2	1.13845	0.076894	3.75848	1	1	1	0.477009	0.807677	0.000843118
AP3S1	0.810675	5.7447	0.44489	1	1	1	0.17433	0.0659736	0.368253
AP3S2	0.342415	0.12072	0.0114962	1	1	1	0.165134	0.889644	0.834466
AP4B1	0.243352	5.51736	0.394717	1	0.314545	1	1	0.000313968	0.991603
AP4E1	0.539323	1.57537	0.107884	1	1	1	0.485006	0.226309	0.614954
AP4M1	0.860166	1.99162	1.63834	1	1	1	0.909236	0.0239904	0.423031
AP4S1	0.162956	0.116214	0.000672254	1	1	1	0.940024	0.646941	0.985206
APAF1	2.73136	0.946604	1.46506	1	1	1	0.159536	0.366653	0.236306
APBA1	0.681614	0.522507	0.0461695	1	1	1	0.983607	0.263095	0.926429
APBA2	0.196589	0.48126	0.178955	1	1	1	0.646141	0.40064	0.255898
APBA3	0.389383	0.0028463	0.123878	1	1	1	0.772891	0.946022	0.589364
APBB1	0.503397	0.132928	0.200419	1	1	1	0.933626	0.663335	0.82367
APBB1IP	0.0519342	0.00260451	0.674341	1	1	1	0.971611	0.95082	0.206717
APBB2	0.00242145	0.0090537	0.0608936	1	1	1	0.995602	0.904438	0.604558
APBB3	0.0109204	1.77459	0.0989075	1	1	1	0.868453	0.097561	0.602559
APC	0.352667	0.0768116	0.823661	1	1	1	0.996801	0.588565	0.798481
APCDD1	1.72643	0.152282	0.898716	1	1	1	0.839664	0.506197	0.265094
APCDD1L	0.273365	1.70904	0.381742	1	1	1	0.135946	0.057577	0.238305
APEH	2.89452	0.0543129	0.0077186	0.189166	1	1	0.00158158	0.842863	0.817273
APH1B	0.975541	1.34694	0.112033	0.218454	0.746649	1	0.0019859	0.00278346	0.646941
API5	1.8122	0.28156	0.848438	1	1	1	0.42463	0.471012	0.278689
APIP	0.0205078	0.710263	1.01055	1	1	1	0.956817	0.584566	0.166333
APITD1	0.01043	0.0116516	1.77093	1	1	1	0.984006	0.858856	0.0107957
APLF	1.96693	5.47959	0.363165	1	1	1	0.615754	0.0271891	0.983207
APLNR	0.174627	0.47592	0.346275	1	1	1	0.721311	0.617753	0.153139
APLP2	0.258364	1.36466	0.399589	1	1	1	0.931627	0.0623751	0.938025
APOA2	0.0116663	0.0387449	0.412591	1	1	1	0.994402	0.806078	0.686525
APOB	1.02053	0.720821	0.00804976	0.831822	1	1	0.009996	0.167933	0.883647
APOBEC1	0.895202	0.0224744	0.0656957	1	1	1	0.662935	0.839264	0.818873
APOBEC3A	0.0432955	0.531408	0.756954	1	1	1	0.634546	0.235506	0.451419
APOBEC3C	0.418445	0.165607	0.61628	1	1	1	0.0147941	0.611355	0.852459
APOBEC3F	2.38945	0.0300091	0.221599	1	1	1	0.882847	0.819272	0.818073
APOBEC3G	0.00143077	2.53516	0.652759	1	1	1	0.97401	0.293083	0.487005
APOBEC3H	1.26501	0.598924	0.274972	1	1	1	0.942023	0.391843	0.866853
APOBEC4	0.023083	0.722275	0.135823	1	1	1	0.976809	0.448221	0.931227
APOC4	0.297129	0.668103	4.53406	1	1	1	0.52419	0.309876	0.0215914
APOE	0.0638811	0.395934	1.24897	1	1	1	0.991603	0.420632	0.570172
APOH	6.96187	1.26361	0.0922906	0.129466	1	1	0.000787196	0.037585	0.977209
APOL1	0.698707	0.0136171	1.25791	1	1	1	0.973611	0.914834	0.619752
APOL2	2.38589	3.17125	0.0586852	0.0643413	1	1	0.000108031	0.0487805	0.614154
APOL3	0.937257	1.51568	0.157439	1	1	1	0.195122	0.0471811	0.976809
APOL4	7.95166	0.704128	0.0409097	0.0643413	1	1	0.000113607	0.265094	0.655338
APOL5	0.486963	1.62933e-06	0.805491	1	1	1	0.990404	0.998401	0.105958
APOL6	0.442772	0.00169778	0.0598669	1	1	1	0.948421	0.970812	0.537385
APOLD1	0.887689	0.240392	1.48553	1	1	1	0.317473	0.591763	0.0187925
APP	0.00641442	0.000499258	0.20551	1	1	1	0.922831	0.97441	0.429828
APPBP2	3.08693	0.00550294	1.65406	1	1	1	0.472611	0.963615	0.133946
APPL1	0.0581147	2.79121	0.0911728	1	1	1	0.954018	0.0415834	0.818073
APPL2	0.44167	0.233479	0.000341942	1	1	1	0.7497	0.781687	0.978409
APRT	4.88511	0.94555	0.704073	1	1	1	0.027589	0.181127	0.338265
APTX	3.21494	3.84878	1.28394	1	1	1	0.238704	0.118752	0.191124
AQP1	0.083376	1.69798	0.727175	1	1	1	0.9996	0.0655738	0.510196
AQP10	2.21288	3.64868	0.892453	1	1	1	0.187925	0.230308	0.355858
AQP11	0.419098	0.054166	0.319819	1	1	1	0.208317	0.84886	0.712915
AQP2	0.259261	0.000908593	1.37171	1	1	1	0.265094	0.97441	0.397041
AQP3	0.00159105	3.11163	0.189842	1	1	1	0.936026	0.113555	0.778489
AQP4	1.65273	0.0559822	0.0852284	1	1	1	0.872451	0.714914	0.859656
AQP6	0.502538	0.285236	0.131057	1	1	1	0.217913	0.562975	0.52379
AQP7	0.217305	0.140895	0.689311	1	1	1	0.346261	0.593363	0.152339
AQP8	0.117709	1.44028	1.4185	1	1	0.710913	0.914034	0.262695	2.05838e-05
AQP9	0.120017	3.49564	0.127762	1	1	1	0.918433	0.0459816	0.602159
AQR	0.00424387	0.346652	0.0954514	1	1	1	0.830068	0.20032	0.55058
ARAP1	0.682315	0.00629523	0.048321	1	1	1	0.0507797	0.959616	0.720112
ARAP2	0.111017	0.408574	0.187578	1	1	1	0.927629	0.556577	0.509796
ARAP3	0.463064	1.85792	0.206432	1	1	1	0.828869	0.217913	0.518992
ARC	0.000985978	21.7765	0.167766	1	0.426936	1	0.97561	0.000801647	0.584566
ARCN1	0.441018	0.310561	1.44334	1	1	1	0.139544	0.501	0.130748
ARD1B	5.94404	0.00879019	1.58502	0.126532	1	1	0.000752288	0.873251	0.0979608
ARF1	0.853657	0.813257	0.162847	1	1	1	0.445422	0.483407	0.197921
ARF3	1.66888	0.080468	0.0528692	1	1	1	0.0539784	0.687725	0.634946
ARF4	0.254277	0.763284	0.138052	1	1	1	0.971212	0.181927	0.982807
ARF5	9.52718	2.67671	0.238482	0.240582	0.431529	1	0.00227805	0.000866598	0.669732
ARFGAP1	1.97439	20.886	0.0271922	1	1	1	0.178329	0.0559776	0.829268
ARFGAP2	0.540822	0.870553	0.011151	1	1	1	0.443423	0.378249	0.832467
ARFGAP3	1.27798	1.64221	0.08776	1	1	1	0.0547781	0.171931	0.754098
ARFGEF1	3.52616	1.6304	2.59059	1	1	1	0.567773	0.0735706	0.17513
ARFGEF2	1.58889	1.73945	0.0698925	0.437043	1	1	0.00500544	0.115954	0.637345
ARFIP1	0.127411	0.21895	0.928977	1	1	1	0.756497	0.365054	0.0451819
ARFIP2	0.0665363	1.64653	0.165499	1	1	1	0.877249	0.133946	0.62495
ARG1	0.531886	0.511083	0.237665	1	1	1	0.109156	0.382247	0.511395
ARG2	1.85768	1.42418	0.851686	0.290458	1	1	0.00298041	0.195522	0.561375
ARGFX	0.731945	0.00588077	0.357609	1	1	1	0.0595762	0.930028	0.155138
ARGLU1	3.55905	1.17852	1.88882	0.106904	1	1	0.00054976	0.177529	0.00448391
ARHGAP1	0.00276406	0.0414685	0.703985	1	1	1	0.89964	0.742903	0.340664
ARHGAP10	2.10571	1.73998	1.62732	1	1	1	0.253499	0.165534	0.311076
ARHGAP11A	0.333011	0.18059	0.334452	1	1	1	0.129548	0.441024	0.354658
ARHGAP12	1.16467	0.436739	0.0311771	1	1	1	0.022391	0.435426	0.802479
ARHGAP15	1.13421	0.585763	0.0122854	1	1	1	0.0215914	0.173131	0.840864
ARHGAP17	1.97355	0.00643969	0.617633	1	1	1	0.789284	0.898441	0.638145
ARHGAP18	0.0872513	0.602093	0.000210198	1	1	1	0.633347	0.539784	0.984406
ARHGAP19	1.77984	4.11757	1.69647	1	1	1	0.265094	0.0427829	0.254698
ARHGAP20	2.69407	4.53588	1.06705	1	1	1	0.566973	0.0155938	0.482607
ARHGAP21	0.0999124	0.197849	0.735595	1	1	1	0.910036	0.910036	0.17513
ARHGAP22	5.73936	1.80388	0.557514	0.0584796	1	1	6.42171e-05	0.222711	0.152339
ARHGAP24	2.37026	2.61007	0.409008	0.111755	0.57007	1	0.000604764	0.00171468	0.120752
ARHGAP25	0.281906	1.74503	0.0418624	1	1	1	0.845662	0.512195	0.59896
ARHGAP26	1.27838	5.84439e-05	0.00251143	1	1	1	0.0287885	0.994002	0.933626
ARHGAP27	1.08055	2.20728	0.657874	1	1	1	0.589764	0.0995602	0.648541
ARHGAP28	1.59655	0.103241	4.25308	1	1	1	0.0271891	0.732107	0.0171931
ARHGAP29	0.0601976	0.528292	0.107451	1	1	1	0.931627	0.333067	0.455018
ARHGAP30	1.1772	6.68454	1.7351	0.272601	0.621513	1	0.00268615	0.00203484	0.0931627
ARHGAP5	0.633086	0.623158	0.0047055	1	1	1	0.042383	0.237905	0.845662
ARHGAP8	1.94021	3.90921	2.18989	0.0962879	1	1	0.000422915	0.0139944	0.0018687
ARHGAP9	0.744263	0.614368	0.00894256	1	1	1	0.606557	0.520192	0.903239
ARHGDIB	0.377931	2.15479	0.214818	1	1	1	0.403439	0.290284	0.342663
ARHGEF1	1.44723	0.0588993	0.112771	1	1	1	0.464614	0.792883	0.367053
ARHGEF10	0.182129	0.60409	0.155133	1	1	1	0.920432	0.622951	0.223511
ARHGEF10L	1.97613	10.5709	0.384653	1	1	1	0.370252	0.0247901	0.590164
ARHGEF11	0.368933	0.0900014	1.42147	1	1	1	0.418233	0.863654	0.0251899
ARHGEF12	0.40422	1.06752	0.0477713	1	1	1	0.381847	0.502199	0.667333
ARHGEF15	0.801303	8.98523	0.000451861	1	1	1	0.373451	0.012395	0.985606
ARHGEF16	1.01316	3.87816	0.980863	1	1	1	0.265894	0.0811675	0.338265
ARHGEF17	4.45313	0.761428	2.48257	1	1	1	0.111955	0.34986	0.187125
ARHGEF18	0.591525	0.0620373	0.00577552	1	1	1	0.818073	0.817673	0.965214
ARHGEF19	0.436027	2.75055	1.29589	1	1	1	0.39984	0.037585	0.163535
ARHGEF2	3.7019	0.000415689	0.0785079	0.171504	1	1	0.00132921	0.988005	0.682527
ARHGEF3	1.45748	0.478742	0.226542	0.127463	1	1	0.000762052	0.233906	0.32547
ARHGEF4	2.35074	0.133074	0.324279	1	1	1	0.901639	0.658537	0.998401
ARHGEF5	4.64873	0.73049	0.59092	0.159556	1	1	0.00115065	0.145542	0.160736
ARHGEF7	1.53362	4.61737	0.0522187	0.191356	1	1	0.00160624	0.0363854	0.439424
ARID1A	4.22934	0.377664	0.0808619	0.0487494	1	1	2.78724e-05	0.64934	0.778888
ARID1B	0.99292	1.21307	0.841122	1	1	1	0.943223	0.154338	0.594562
ARID2	1.21437	0.011725	0.255241	1	1	1	0.686925	0.872851	0.890844
ARID3A	4.98536	4.44497	1.02684	1	1	1	0.0607757	0.0231907	0.358656
ARID3B	1.87907	0.0284837	2.29824	1	1	1	0.160736	0.777289	0.172331
ARID3C	0.341848	1.20649	0.085905	1	1	1	0.47461	0.326269	0.758097
ARID4A	2.32312	0.349458	0.196252	0.161731	1	1	0.00119552	0.444222	0.480208
ARID4B	0.69476	0.568719	0.1916	1	1	1	0.912435	0.406237	0.85046
ARID5B	0.850006	0.805764	1.04912	1	1	1	0.717313	0.245902	0.019992
ARIH1	2.86924	0.626074	1.33999	1	1	1	0.171131	0.610556	0.393443
ARIH2	0.317962	0.127618	1.20312	1	1	1	0.994402	0.62455	0.683727
ARL1	7.16687	1.54333	0.856342	0.078619	1	1	0.000262662	0.227109	0.0351859
ARL10	0.787461	0.555725	0.000125357	1	1	1	0.0603759	0.294682	0.981607
ARL13B	0.389681	4.02283	0.348795	1	1	1	0.444622	0.122351	0.289884
ARL15	0.016275	5.88449	0.0606339	1	0.300662	1	0.998001	0.000105559	0.415434
ARL2	1.88089	0.242429	0.098276	0.308346	1	1	0.00324094	0.623351	0.753698
ARL2BP	0.37028	1.4235	0.0552205	1	1	1	0.967213	0.103159	0.991603
ARL3	1.60365	2.36872	0.339851	0.132855	1	1	0.000829911	0.0487805	0.307077
ARL4A	0.020595	0.373781	0.21152	1	1	1	0.861255	0.477809	0.486605
ARL5A	1.85955	0.0839823	0.289705	1	1	1	0.534186	0.821671	0.346661
ARL5B	0.000362298	0.107272	0.149386	1	1	1	0.97441	0.795682	0.798481
ARL6	1.00478	2.17297e-05	0.00582731	1	1	1	0.915634	0.998001	0.97561
ARL6IP1	7.13076	0.0588159	0.149356	0.176681	1	1	0.00140906	0.966014	0.47541
ARL6IP5	0.0197974	0.387446	0.373502	1	1	1	0.856457	0.680928	0.779688
ARL6IP6	0.00351552	1.9938	2.25046	1	1	1	0.971611	0.706917	0.0463814
ARL8B	1.85436	1.24111	0.312485	1	1	1	0.305478	0.391843	0.129948
ARL9	0.504126	1.27997	0.0876292	1	1	1	0.611355	0.234306	0.738904
ARMC1	6.73847	0.963528	0.507861	0.175209	1	1	0.00137885	0.09996	0.307477
ARMC10	0.629361	2.1097	0.444897	1	1	1	0.712515	0.0559776	0.295482
ARMC2	2.15369	0.0821324	0.0996932	1	1	1	0.65094	0.802879	0.831667
ARMC3	0.997829	3.19248	0.192881	1	1	1	0.478209	0.0895642	0.69932
ARMC4	0.00423699	2.64084	0.00255406	1	1	1	0.957217	0.0663735	0.95002
ARMC5	0.430973	0.212383	0.0183871	1	1	1	0.978808	0.672931	0.860056
ARMC6	0.0989788	1.45084	0.0652244	1	1	1	0.77529	0.205918	0.628948
ARMC7	0.521579	0.433218	0.812009	1	1	1	0.848461	0.402639	0.510996
ARMC8	2.31895	0.00893749	0.00814404	0.0472783	1	1	2.16305e-05	0.840064	0.9996
ARMC9	0.786288	0.0121684	0.890081	1	1	1	0.816473	0.829268	0.614954
ARMETL1	1.50008	2.20725	0.0040907	1	1	1	0.727309	0.042383	0.983607
ARMS2	0.830841	2.17004	0.0062486	1	1	1	0.10036	0.229908	0.884446
ARNT	1.14669	5.07077	0.0851035	1	1	1	0.528988	0.156737	0.878449
ARNT2	6.36794e-05	1.05297	0.0213206	1	1	1	0.9996	0.278689	0.601359
ARNTL	1.1974	0.00012927	0.0275744	1	1	1	0.0303878	0.988405	0.667733
ARNTL2	3.49007	0.559605	0.1319	0.0999743	1	1	0.00047233	0.364654	0.455418
ARPC1A	0.019919	2.4608	0.051241	1	1	1	0.715714	0.00663795	0.836066
ARPC1B	2.04147	0.0436364	1.29002	1	1	1	0.747701	0.891243	0.205918
ARPC2	0.000875992	0.0175996	0.35516	1	1	1	0.947621	0.902439	0.347061
ARPC4	2.87182	0.196465	0.00296524	0.0983794	1	1	0.000450434	0.704918	0.896441
ARPC5	0.251651	0.0474469	5.21654	1	1	1	0.580968	0.878049	0.0347861
ARPC5L	10.9398	1.5747	0.187357	0.0700599	1	1	0.000167049	0.0147941	0.87405
ARPP-19	1.70163	0.158189	0.556537	0.278789	1	1	0.00278598	0.385046	0.580968
ARPP-21	1.46371	3.66888e-05	1.21292	1	1	1	0.514194	0.994402	0.206717
ARRB1	0.927616	0.464188	0.0705876	1	1	1	0.691723	0.318672	0.465414
ARRB2	1.69896	3.64842	1.01602	1	1	1	0.662535	0.0251899	0.581767
ARRDC2	2.30699	4.80942	0.533656	1	1	1	0.467813	0.0115954	0.309876
ARRDC4	2.76677	0.334583	1.78283	1	1	1	0.615354	0.404638	0.911235
ARRDC5	6.94803	0.32257	1.42485	0.0424098	1	1	9.92376e-06	0.394242	0.0735706
ARS2	0.677247	0.00153938	0.00684618	1	1	1	0.878449	0.939224	0.92483
ARSA	0.0862413	0.0298266	2.5656	1	1	1	0.472211	0.890444	0.221112
ARSB	0.594152	0.564551	0.0156999	1	1	1	0.954018	0.367853	0.910836
ARSG	0.301265	0.14902	0.0915715	1	1	1	0.938025	0.659736	0.632147
ARSJ	0.178866	0.936382	0.299795	1	1	1	0.745702	0.147941	0.331867
ARSK	1.14162	6.86611	0.00986206	1	1	1	0.803279	0.0315874	0.996801
ART1	0.445895	0.474865	0.258554	1	1	1	0.159936	0.042383	0.863255
ART3	2.09013	0.299932	0.503197	1	1	1	0.0139944	0.504598	0.231907
ART4	3.86741	0.187575	0.0760342	0.288147	1	1	0.00294345	0.783287	0.542183
ART5	2.1528	0.866067	0.514744	1	1	1	0.104758	0.457817	0.729308
ARTN	1.26481	0.653482	0.21754	1	1	1	0.0411835	0.282687	0.608557
ARV1	0.0500669	0.191706	0.0567813	1	1	1	0.596162	0.503399	0.734906
ARVCF	0.140751	4.85309	0.551243	1	1	1	0.581367	0.0379848	0.34866
AS3MT	0.012797	2.98782	0.183503	1	0.831356	1	0.888844	0.00341448	0.434226
ASAH1	0.709893	1.03798	0.188411	0.176681	1	1	0.00141037	0.244702	0.539784
ASAH2	0.567537	2.13845	0.865512	1	0.362143	1	0.173131	0.00051665	0.0951619
ASAH2B	1.96535	0.428926	0.624758	1	1	1	0.955218	0.323071	0.990004
ASAM	1.49939	0.000962106	0.00653528	1	1	1	0.790484	0.967613	0.813674
ASAP1	0.360296	1.03625	1.6378	1	1	1	0.97601	0.239104	0.141543
ASAP2	0.0151738	0.0449983	0.69534	1	1	1	0.998001	0.738505	0.630548
ASAP3	1.85001	0.214173	0.017372	1	1	1	0.572571	0.712115	0.755698
ASB1	0.0278592	0.197228	0.517331	1	1	1	0.937225	0.727309	0.296281
ASB10	0.522792	0.340488	0.457721	1	1	1	0.877649	0.521791	0.585366
ASB13	2.88923	0.637962	0.946844	1	1	1	0.019992	0.376649	0.211515
ASB14	0.435746	0.00261983	0.00288507	1	1	1	0.538585	0.969212	0.94962
ASB15	0.0737939	0.00572055	1.3834	1	1	1	0.916833	0.952819	0.145542
ASB16	6.70477	2.92657	0.410945	0.0983566	1	1	0.000449024	0.127549	0.179128
ASB17	0.387284	3.7081	0.396292	1	0.401516	1	0.59936	0.000650085	0.226709
ASB18	0.557158	1.86295	0.218843	1	1	1	0.994402	0.0635746	0.982407
ASB2	0.14539	5.26247	1.02766	1	0.312036	1	0.808477	0.000302733	0.0611755
ASB3	0.156883	4.03181	0.185774	1	1	1	0.836865	0.0695722	0.401839
ASB4	2.04579	1.78473	0.785954	0.0967046	1	1	0.000425521	0.087565	0.0227909
ASB5	1.34543	0.971744	2.98038	1	1	1	0.0319872	0.267493	0.0203918
ASB6	0.218985	5.34801	0.237006	1	1	1	0.719712	0.0103958	0.938824
ASB7	0.119521	0.977511	0.387048	1	1	1	0.942823	0.0207917	0.961615
ASCC1	0.130208	0.353153	1.34099	1	1	1	0.942023	0.543782	0.291883
ASCC2	0.00455926	3.78419	0.250665	1	1	1	0.993603	0.183926	0.37385
ASCC3	0.0193576	2.29123	0.162798	1	1	1	0.813674	0.538984	0.291883
ASCL1	0.57024	0.0175567	0.0203818	1	1	1	0.503798	0.912835	0.738505
ASCL3	1.77895	3.13047	0.32655	1	1	1	0.55058	0.0663735	0.976409
ASCL4	6.94073	0.335958	0.573003	0.389413	1	1	0.00434775	0.389444	0.562575
ASF1A	0.715926	0.020386	0.0513186	1	1	1	0.460616	0.919232	0.77449
ASF1B	1.09648	0.0437763	0.000689952	1	1	1	0.37585	0.829268	0.971611
ASGR2	0.943697	0.806749	0.640938	1	1	1	0.728908	0.280288	0.358257
ASH1L	4.84814	0.792958	0.0453988	0.0706757	1	1	0.000170308	0.398241	0.806477
ASH2L	2.31631	0.219882	0.258239	1	1	1	0.0979608	0.584966	0.502599
ASIP	0.217579	2.85491	0.110259	1	1	1	0.860456	0.240304	0.782887
ASL	0.040844	0.032096	0.0154826	1	1	1	0.958017	0.812475	0.814474
ASNS	0.00326825	0.471605	2.76891	1	1	1	0.996801	0.666933	0.000132233
ASPA	6.46374	0.810072	0.31589	0.0584796	1	1	6.39831e-05	0.369852	0.0767693
ASPG	0.068954	2.04628	0.109407	1	1	1	0.757297	0.120352	0.461415
ASPH	0.000549087	0.0478121	0.333284	1	1	1	0.985206	0.765694	0.379048
ASPHD2	0.0145922	1.45571	0.0344784	1	1	1	0.990004	0.477409	0.752899
ASPM	0.547806	0.939787	0.111557	1	1	1	0.587765	0.069972	0.996002
ASPSCR1	0.104144	0.0271267	1.41336	1	1	1	0.972811	0.834866	0.396641
ASRGL1	1.38659	2.62766	0.417342	1	1	1	0.252299	0.203918	0.660136
ASS1	0.535206	0.0599488	0.40683	1	1	1	0.998401	0.59976	0.994802
ASTE1	5.07788	0.0299507	0.0511502	0.272814	1	1	0.00269731	0.718513	0.668133
ASTL	8.33577	0.0142051	0.978611	0.110196	1	1	0.000589357	0.813674	0.0207917
ASTN1	0.161564	0.134791	0.00271496	1	1	1	0.858457	0.685326	0.947221
ASTN2	0.260885	0.0941652	0.00816043	1	1	1	0.990804	0.666933	0.829268
ASXL1	3.71562	1.90281	0.0119808	0.0919331	1	1	0.000382451	0.336665	0.870052
ASXL2	2.53531	0.8942	0.512762	0.0644739	1	1	0.000121128	0.796082	0.0603759
ASXL3	1.40951	0.0256395	0.0358433	1	1	1	0.0151939	0.845662	0.883647
ASZ1	0.306028	1.63863e-07	0.307747	1	1	1	0.640544	0.998401	0.673331
ATAD1	0.0181679	0.645971	1.62139	1	1	1	0.769292	0.816473	0.32427
ATAD2	0.0229609	0.109981	0.00454794	1	1	1	0.883647	0.820872	0.864854
ATAD2B	0.853186	3.13545	0.84313	1	1	1	0.915634	0.0447821	0.657337
ATAD3A	0.170556	2.11438	0.432101	1	1	1	0.337865	0.101159	0.0339864
ATAD3B	1.73657	0.59233	0.10118	1	1	1	0.0635746	0.363055	0.309076
ATAD4	1.21422	0.113796	2.56447	1	1	1	0.802479	0.746102	0.00101121
ATAD5	0.428364	0.0720288	0.0749992	1	1	1	0.865654	0.729308	0.812075
ATCAY	0.124859	0.350241	0.387714	1	1	1	0.620152	0.702519	0.252699
ATE1	1.22006	0.401759	0.0314142	1	1	1	0.597361	0.321471	0.859256
ATF1	0.29779	1.88136	0.0664103	1	1	1	0.0983607	0.0951619	0.746501
ATF2	1.80969	3.36693	0.203141	1	1	1	0.418632	0.147541	0.756897
ATF3	0.000158197	0.495498	0.0179696	1	1	1	0.990804	0.534986	0.79928
ATF5	0.177833	2.15703	0.00760973	1	0.620208	1	0.67573	0.0020001	0.885246
ATF6	0.100274	0.445614	1.04048	1	1	1	0.259096	0.223511	0.395442
ATF6B	0.037098	0.0400552	1.80689	1	1	1	0.836865	0.814874	0.059976
ATF7	10.2669	3.08635	0.56693	0.0619693	1	1	9.5763e-05	0.142343	0.19872
ATF7IP	0.728289	1.18091e-05	0.328088	1	1	1	0.894842	0.995602	0.511395
ATF7IP2	2.45937	0.0229927	0.580009	1	1	1	0.079968	0.853658	0.165934
ATG10	0.0273565	0.049308	1.02049	1	1	1	0.9988	0.771292	0.623351
ATG12	0.140673	2.68397e-06	0.585961	1	1	1	0.966813	0.996801	0.57537
ATG16L1	0.000593317	0.174815	0.57939	1	1	1	0.962415	0.82367	0.619352
ATG16L2	0.207077	0.633306	0.346676	1	1	1	0.237105	0.0987605	0.486205
ATG2A	0.260225	1.07052	4.07275e-05	1	1	1	0.735306	0.154738	0.991203
ATG2B	0.679496	0.148886	1.15549	1	1	1	0.62415	0.642543	0.0451819
ATG3	0.530868	0.0922146	0.0125097	1	1	1	0.0991603	0.580968	0.89964
ATG4C	0.278384	0.0445231	0.0413181	1	1	1	0.657737	0.880048	0.62415
ATG5	0.638726	0.286991	0.149083	1	1	1	0.227109	0.391843	0.414634
ATG7	0.381003	0.736622	0.010229	1	1	1	0.246701	0.254298	0.870052
ATG9A	0.0191472	0.250431	0.778064	1	1	1	0.82367	0.57377	0.109956
ATG9B	0.0449282	0.0018184	0.0405366	1	1	1	0.977209	0.971611	0.568573
ATHL1	4.7566	0.261657	0.193848	1	1	1	0.0279888	0.498601	0.480608
ATIC	0.281153	5.60135	0.0344651	1	0.36708	1	0.814074	0.000543904	0.931227
ATL1	0.86308	2.43814	2.64547	1	1	1	0.932027	0.0115954	0.0867653
ATL2	0.00478418	0.501875	1.30495	1	1	1	0.954818	0.258297	0.19992
ATL3	0.0792989	1.18834	0.024671	1	1	1	0.997601	0.0183926	1
ATM	0.0121624	0.877698	0.809718	1	1	1	0.995202	0.183926	0.122751
ATMIN	0.707439	7.90226	1.17389	1	1	1	0.571771	0.0155938	0.155138
ATN1	1.11008	0.946229	0.000948097	1	1	1	0.183527	0.177129	0.960016
ATOH7	0.0188386	0.456908	0.0419934	1	1	1	0.959616	0.590164	0.87605
ATOH8	1.22863	1.28258	0.293239	1	1	1	0.788085	0.269492	0.917633
ATOX1	1.33259	0.945764	1.6478	1	1	1	0.554578	0.185526	0.547381
ATP10A	0.989393	0.00574633	0.351939	1	1	1	0.946022	0.888844	0.745302
ATP10B	0.606621	0.0105767	3.41995	1	1	1	0.118752	0.960416	0.0703718
ATP10D	2.96216	0.106684	0.18259	0.0487494	1	1	3.22249e-05	0.79968	0.301879
ATP11A	3.39448	0.73086	0.397924	1	1	1	0.236306	0.193922	0.622951
ATP11B	0.0146344	0.0356398	0.000836077	1	1	1	0.855658	0.848461	0.961216
ATP12A	0.0594224	0.508264	0.145933	1	1	1	0.764094	0.42463	0.568173
ATP13A1	2.57007	2.76106	0.379396	0.122506	1	1	0.000717789	0.146341	0.17393
ATP13A2	3.00983	3.93548	0.097146	0.166651	1	1	0.0012728	0.012395	0.418632
ATP13A3	1.33167	1.81623	0.238729	1	1	1	0.493802	0.285086	0.92563
ATP13A4	1.09403	0.0120206	0.542125	1	1	1	0.370652	0.920032	0.29908
ATP13A5	1.14858	2.37987	0.911079	1	1	1	0.662535	0.179928	0.427829
ATP1A1	2.39218	2.11726	1.4837	1	1	1	0.184326	0.0507797	0.813674
ATP1A2	1.23093	6.94665	0.228237	1	0.505884	1	0.535786	0.00122188	0.256697
ATP1A3	1.45461	14.8152	0.141436	1	1	1	0.469812	0.0127949	0.57577
ATP1A4	0.00261875	1.11749	0.111083	1	1	1	0.996002	0.391443	0.396641
ATP1B1	7.17453	5.10418	0.540337	0.0469844	0.36708	1	1.57018e-05	0.000534368	0.0555778
ATP1B2	0.0518025	1.6554	0.00121087	1	1	1	0.993603	0.22431	0.95002
ATP1B3	0.204529	1.06383	0.62924	1	1	1	0.9988	0.779688	0.162735
ATP2A1	0.0920547	1.77927	2.47918	1	1	1	0.487805	0.0731707	0.017593
ATP2A2	0.224624	0.821399	0.154864	1	1	1	0.92443	0.313475	0.495402
ATP2A3	1.08194	0.0924685	0.0115262	1	1	1	0.0803679	0.780488	0.891243
ATP2B1	1.12098	1.6526	0.0971821	1	1	1	0.469012	0.145142	0.57457
ATP2B2	0.148237	2.75144	0.0028194	1	0.65825	1	0.62535	0.00223856	0.868453
ATP2B4	0.0098149	1.32995	0.0192986	1	1	1	0.863255	0.138345	0.857257
ATP2C1	3.4638	0.14049	0.0448151	1	1	1	0.0159936	0.435026	0.726509
ATP2C2	1.15536	0.0780153	0.0707725	1	1	1	0.243503	0.864854	0.520592
ATP4A	0.00252891	2.93283	0.312996	1	1	1	0.933626	0.122751	0.311076
ATP4B	0.561841	6.48488	0.317217	1	0.332145	1	0.437425	0.000429774	0.307077
ATP5A1	8.02607	3.14114	1.04533	0.0983794	1	1	0.000450322	0.157937	0.00440728
ATP5C1	0.205218	1.9717	0.0989349	1	1	1	0.832467	0.209116	0.677729
ATP5F1	1.5432	0.272107	1.86124	0.188309	1	1	0.00156104	0.5006	0.47421
ATP5G2	0.0118625	0.0677405	2.34583	1	1	1	0.864854	0.735706	0.00317122
ATP5H	11.5367	4.26269	0.599784	0.058139	0.300662	1	5.99107e-05	0.000221296	0.155138
ATP5O	0.0318077	3.62214	1.18553	1	0.300662	1	0.872451	0.000139446	0.172331
ATP5S	2.21965	0.161393	0.807968	1	1	1	0.0191923	0.545382	0.232307
ATP5SL	0.58128	2.80588	0.00026276	1	1	1	0.727709	0.027589	0.994002
ATP6V0A1	0.733959	0.0098209	0.0444529	1	1	1	0.729308	0.914034	0.841663
ATP6V0A2	1.39372	1.63493	0.00393501	1	1	1	0.2511	0.2487	0.990004
ATP6V0A4	0.00888726	2.27941	0.270514	1	1	1	0.988804	0.0743702	0.134746
ATP6V0B	0.223119	0.00610328	0.997508	1	1	1	0.84966	0.939224	0.611755
ATP6V0D1	1.37952	0.250259	1.9622	1	1	1	0.998001	0.562575	0.792483
ATP6V0D2	1.43644	1.73557	0.407105	1	1	1	0.781687	0.0379848	0.0915634
ATP6V0E1	3.07542	0.147152	0.0100799	0.121863	1	1	0.000709168	0.688125	0.777289
ATP6V0E2	4.23331	3.53942	1.08821	1	1	1	0.0327869	0.179528	0.801279
ATP6V1A	2.1989	0.482038	0.155777	1	1	1	0.0847661	0.664134	0.434226
ATP6V1B1	0.0146308	5.27074	0.812479	1	1	1	0.89924	0.0579768	0.121151
ATP6V1B2	0.0456199	0.00198881	0.327605	1	1	1	0.754898	0.944422	0.454218
ATP6V1C1	1.50537	0.176303	0.356465	1	1	1	0.867253	0.355458	0.331467
ATP6V1C2	0.283773	0.363939	0.744339	1	1	1	0.422231	0.581367	0.183527
ATP6V1E1	0.0599265	0.0153746	0.0663665	1	1	1	0.942423	0.869252	0.946022
ATP6V1E2	0.218525	1.06101	0.00359936	1	1	1	0.682127	0.441423	0.917633
ATP6V1F	0.0809688	5.09551	0.191362	1	1	1	0.569372	0.0623751	0.417833
ATP6V1G1	1.08885	1.61072	0.0238842	0.206574	1	1	0.00180006	0.102759	0.805278
ATP6V1G2	1.34585	0.306004	0.888505	1	1	1	0.271092	0.35066	0.453818
ATP6V1G3	0.502482	3.17497	0.926201	1	1	1	0.762495	0.176729	0.559376
ATP6V1H	0.209231	1.28578	0.00938334	1	1	1	0.29988	0.265894	0.846461
ATP7B	0.402348	2.14377	0.00819377	1	1	1	0.761296	0.0827669	0.806078
ATP8A1	0.551036	1.02175	0.953012	1	1	1	0.89884	0.0459816	0.00260003
ATP8A2	5.54949	1.90908	0.215267	0.077997	1	1	0.000254288	0.220712	0.22591
ATP8B1	1.25208	2.25192	0.058528	1	1	1	0.32547	0.110756	0.768493
ATP8B2	2.75591	0.331863	0.134235	1	1	1	0.512595	0.554978	0.371052
ATP8B3	0.188462	0.5213	1.58759	1	1	1	0.557377	0.462615	0.109556
ATP8B4	1.12835	0.214411	1.1321	0.235313	1	1	0.00221099	0.52459	0.0635746
ATP9A	0.769614	2.37175	0.167067	1	1	1	0.335466	0.0327869	0.257097
ATP9B	0.219077	0.491811	0.790733	1	1	1	0.226709	0.272691	0.241104
ATPAF1	0.617182	0.0211847	0.178478	1	1	1	0.140344	0.866453	0.795282
ATPBD3	0.542004	2.09166	1.18452	1	1	1	0.513395	0.0479808	0.0991603
ATPBD4	3.78516	0.468267	0.376416	1	1	1	0.322271	0.260696	0.860056
ATPGD1	0.118783	1.57418	0.458199	1	1	1	0.791683	0.234306	0.236306
ATPIF1	0.082172	0.00814057	0.637765	1	1	1	0.996801	0.861655	0.955218
ATR	2.10054	1.09443	0.000597146	1	1	1	0.405438	0.047581	0.965214
ATRIP	0.64615	0.164603	2.77808	1	1	1	0.240304	0.762095	0.000985017
ATRN	0.187039	1.19491	0.273935	1	1	1	0.952019	0.389044	0.658537
ATRNL1	0.0743348	0.109063	0.748537	1	1	1	0.985606	0.486605	0.438225
ATXN1	0.468925	1.61585	0.178241	1	1	1	0.754498	0.193523	0.227909
ATXN10	1.539	0.231326	1.36485	1	1	1	0.882847	0.60056	0.155138
ATXN2	0.368524	0.226979	0.827784	1	1	1	0.205518	0.630548	0.0255898
ATXN2L	0.506084	5.95508	2.72862	1	0.641337	1	0.354658	0.00214484	0.137545
ATXN3	0.760348	0.650977	0.470351	1	1	1	0.0811675	0.337465	0.313875
ATXN7	1.84827	0.0503801	0.0567471	1	1	1	0.287085	0.706917	0.902039
ATXN7L1	1.50982	0.699771	0.137391	0.182859	1	1	0.00149185	0.196721	0.473411
ATXN7L2	3.64922	2.47078	0.252446	0.0469844	1	1	1.92446e-05	0.115154	0.277489
ATXN7L3	0.0566848	0.323834	0.0121226	1	1	1	0.616154	0.544582	0.813674
ATXN8OS	2.19964	0.501585	0.155737	0.189497	1	1	0.0015856	0.638145	0.493403
AUH	0.248215	0.27471	0.00161292	1	1	1	0.788884	0.380648	0.92483
AUP1	15.8588	2.45063	0.378229	0.071113	0.300662	1	0.000180728	0.000179433	0.605358
AURKA	1.16676	1.31854	0.104168	0.1691	1	1	0.00129803	0.0511795	0.809676
AURKAIP1	0.23914	2.54337	0.893573	1	1	1	0.305078	0.042383	0.027589
AURKB	0.0133279	0.417864	0.353044	1	1	1	0.870852	0.314274	0.257897
AURKC	7.60127	4.34673	2.19336	0.198883	0.310506	1	0.00169846	0.000288454	0.0271891
AUTS2	0.0246618	1.0325	0.0101251	1	1	1	0.993203	0.40064	0.862455
AVEN	0.994126	0.473409	0.564846	1	1	1	0.984406	0.420232	0.92403
AVIL	1.53343	0.476529	0.161394	1	1	1	0.213515	0.377049	0.884446
AVL9	2.45529	2.62683	0.53624	1	1	1	0.0507797	0.0883647	0.407437
AVPI1	0.773321	1.2663	0.128121	1	1	1	0.115954	0.115154	0.452619
AVPR1A	0.381839	2.39358	0.00395848	1	1	1	0.704118	0.0291883	0.968013
AXIN1	0.572215	0.207804	0.149254	1	1	1	0.997201	0.489404	0.686525
AXIN2	0.912954	0.438981	0.488991	1	1	1	0.910436	0.428628	0.153139
AXL	0.387507	0.823086	1.24525	1	1	1	0.89924	0.19992	0.172331
AXUD1	0.0278875	0.0695542	1.39438	1	1	1	0.971212	0.828469	0.276289
AZGP1	0.424193	0.303967	0.207877	1	1	1	0.764494	0.593363	0.634946
AZI1	0.947467	2.23348	0.404059	1	0.324496	1	0.830468	0.000387217	0.52499
AZI2	0.00214682	0.0411809	0.418714	1	1	1	0.932027	0.681727	0.505398
AZIN1	0.437983	0.0453515	0.188171	1	1	1	0.988804	0.785686	0.718513
AZU1	0.37485	1.98473	0.00558336	1	1	1	0.686125	0.163135	0.910436
B2M	1.96419	3.67166	0.187935	1	1	1	0.520192	0.0715714	0.183127
B3GALNT1	0.184674	6.82573	0.742087	1	0.41174	1	0.971212	0.000714736	0.238305
B3GALNT2	1.03607	0.734705	0.151423	1	1	1	0.0351859	0.114754	0.558177
B3GALT1	0.357622	0.2863	0.0473087	1	1	1	0.502199	0.434226	0.898441
B3GALT2	1.69652	4.80769	0.0148963	1	1	1	0.0203918	0.0283886	0.77569
B3GALT5	1.54073	1.11479	0.884695	0.413688	1	1	0.00469129	0.115554	0.0291883
B3GALTL	1.38855	0.378879	0.000941889	1	1	1	0.0279888	0.495402	0.945222
B3GAT1	1.70086	0.0641508	1.47312	1	1	1	0.968413	0.666533	0.531787
B3GAT2	0.759045	0.903158	1.56615e-06	1	1	1	0.602559	0.156337	0.9988
B3GNT2	0.0416655	0.659923	0.455147	1	1	1	0.828869	0.553379	0.353459
B3GNT3	0.00149002	3.29457	0.000977463	1	1	1	0.998001	0.0111955	0.979608
B3GNT5	0.562386	2.99962	0.538471	1	1	1	0.639744	0.20032	0.618153
B3GNT6	0.679584	1.05275	0.272259	1	1	1	0.82527	0.183926	0.818073
B3GNT8	1.79785	0.20807	0.662356	1	1	1	0.616553	0.307877	0.931227
B3GNTL1	0.736447	1.66165	0.786336	1	1	1	0.995602	0.308277	0.12395
B4GALNT1	2.6193	0.300827	1.99875	1	1	1	0.0131947	0.351459	0.37385
B4GALNT2	1.98779	0.245134	1.17273	0.721713	1	1	0.00858183	0.95002	0.0255898
B4GALNT3	0.15452	0.0180542	0.533462	1	1	1	0.64894	0.879248	0.360256
B4GALNT4	1.66044	0.0766154	0.219753	1	1	1	0.514194	0.846062	0.358257
B4GALT1	0.0351824	0.0833193	0.00226564	1	1	1	0.907237	0.690124	0.888844
B4GALT2	1.78353	0.037589	1.13675	1	1	1	0.868852	0.882847	0.755698
B4GALT3	0.0298217	0.106889	5.71726	1	1	1	0.738904	0.608557	0.0131947
B4GALT4	1.10798	0.150557	0.22518	1	1	1	0.67533	0.591363	0.351859
B4GALT5	0.233412	0.38215	0.00270424	1	1	1	0.754498	0.301879	0.914434
B4GALT6	0.706237	0.365815	0.716169	1	1	1	0.947221	0.310676	0.610956
B4GALT7	2.02651	1.27796e-05	0.862971	1	1	1	0.371851	0.998401	0.0955618
B9D1	1.02255	1.98789	0.0149774	1	1	1	0.0735706	0.215114	0.791683
B9D2	0.278621	1.70087	1.52655	1	1	1	0.983207	0.0619752	0.633746
BAALC	0.0140147	1.9383	0.0667762	1	1	1	0.942023	0.12635	0.647741
BAAT	0.177692	0.0758849	0.268622	1	1	1	0.526589	0.77529	0.467413
BACE1	1.72076	0.0656163	0.072792	1	1	1	0.118353	0.687725	0.7493
BACE2	1.32463	0.17932	0.509546	1	1	1	0.988005	0.493802	0.980408
BACH1	0.809508	1.96281	0.00411484	1	1	1	0.394642	0.0171931	0.939224
BACH2	0.903627	1.39691	0.600177	1	1	1	0.167133	0.191923	0.0827669
BAD	2.79074	0.0669469	3.34463e-05	1	1	1	0.281487	0.776489	0.992803
BAG1	0.219967	1.17641	1.13014e-05	1	1	1	0.297481	0.115154	0.996801
BAG2	2.86206	10.565	0.391278	1	1	1	0.29868	0.0211915	0.920032
BAG3	0.291002	0.00352489	0.000842194	1	1	1	0.589764	0.960016	0.965614
BAG4	0.0151552	2.69945	0.128481	1	1	1	0.826469	0.0535786	0.559776
BAG5	4.77774	0.00709602	1.15366	0.454971	1	1	0.00524095	0.883247	0.167933
BAHCC1	1.10424	2.4644	1.31159	0.93447	1	1	0.0115954	0.0551779	0.436225
BAHD1	5.20008	0.385031	0.0349197	1	1	1	0.0335866	0.283487	0.691723
BAI1	0.0816971	0.110938	0.233652	1	1	1	0.963615	0.67573	0.421032
BAI2	2.79832	3.40398	0.521445	1	1	1	0.192323	0.0307877	0.833267
BAI3	1.32973	2.281	0.0229259	1	1	1	0.132347	0.0147941	0.97401
BAIAP2	0.0387319	0.0774222	0.713386	1	1	1	0.959216	0.889244	0.0839664
BAIAP2L1	5.41925	0.122372	0.949081	0.1691	1	1	0.00130273	0.435826	0.521391
BAIAP2L2	0.0372506	0.031967	0.262145	1	1	1	0.923231	0.864854	0.738505
BAIAP3	0.0592651	0.0254065	0.554058	1	1	1	0.545382	0.705718	0.0695722
BAK1	0.138097	0.610419	1.67691	1	1	1	0.603758	0.676929	0.156337
BANF1	1.13809	0.577754	0.92818	1	1	1	0.829268	0.478609	0.373051
BANF2	0.303153	1.8666	0.101918	1	1	1	0.966014	0.022391	0.723311
BANK1	1.27441	0.0770736	1.80724	1	1	1	0.62415	0.746501	0.00179805
BANP	0.526089	0.286321	0.273156	1	1	1	0.0891643	0.605758	0.17553
BARD1	0.429312	0.214371	0.316496	1	1	1	0.869252	0.472611	0.656537
BARHL1	1.20124	1.96944	1.02386	1	1	1	0.67533	0.0683727	0.467413
BARX2	0.92526	1.24896	0.00026206	1	1	1	0.0279888	0.260296	0.970012
BASP1	0.181967	0.00021214	0.581652	1	1	1	0.834866	0.988405	0.158337
BAT1	0.352243	1.18779	1.2992	1	1	1	0.187125	0.164334	0.281088
BAT2	0.397859	0.0691167	0.763019	1	1	1	0.964414	0.694522	0.27469
BAT2D1	0.0439067	2.98764	0.738837	1	1	1	0.9988	0.231507	0.00322431
BAT2L	0.463442	6.02603	0.0628408	1	1	1	0.513395	0.0227909	0.886845
BAT3	0.0216267	2.06862	1.58813	1	1	1	0.830868	0.121551	0.147941
BAT4	1.51094	0.0137063	8.9071e-05	1	1	1	0.0131947	0.915234	0.986006
BAT5	0.0149171	1.17109	2.32953	1	1	1	0.796481	0.207917	0.135946
BATF	1.49554	0.622436	1.46686	1	1	1	0.780488	0.423431	0.518992
BATF3	0.0757956	0.00439149	0.487132	1	1	1	0.55098	0.926429	0.226709
BAX	0.216051	6.61556	0.814405	1	1	1	0.406637	0.0151939	0.15034
BAZ1A	0.501784	0.00405498	1.07628	1	1	1	0.145542	0.967613	0.0571771
BAZ1B	2.90694	4.61603	1.99358	1	1	1	0.337065	0.0459816	0.143143
BAZ2A	3.19079	0.0589781	1.04871	1	1	1	0.429428	0.712915	0.776489
BAZ2B	0.0477182	0.990109	0.440537	1	1	1	0.395042	0.141543	0.357457
BBC3	1.96825	0.258515	0.125869	1	1	1	0.45102	0.515794	0.87485
BBOX1	1.50891	0.140199	0.305308	1	1	1	0.922031	0.618153	0.980808
BBS1	0.0634136	0.0281452	0.329402	1	1	1	0.584166	0.7501	0.242703
BBS2	1.5252	1.97525	0.625967	1	1	1	0.0135946	0.113954	0.2499
BBS4	0.267372	0.22125	0.427233	1	1	1	0.207517	0.578569	0.213515
BBS5	0.00197562	6.80085	0.0362813	1	1	1	0.940824	0.0747701	0.802079
BBS7	0.305587	1.46808	0.802303	1	1	1	0.981607	0.111155	0.612955
BBS9	0.455217	0.241718	0.152344	1	1	1	0.903639	0.389844	0.522191
BBX	2.19083	3.26536	0.00878845	0.0487494	1	1	2.5258e-05	0.0159936	0.952419
BCAM	1.2552	4.00446	0.734905	1	1	1	0.403439	0.176729	0.365054
BCAN	1.13846	1.47804	0.0102986	1	1	1	0.910836	0.579768	0.814474
BCAP29	0.608426	0.346669	1.54262	1	1	1	0.733706	0.42423	0.385846
BCAR1	0.0664151	0.00355718	0.00104561	1	1	1	0.85046	0.960416	0.954818
BCAR3	2.81833	0.615991	0.913205	1	1	1	0.253898	0.397041	0.872851
BCAS1	0.131767	0.72803	1.4202	1	1	1	0.97481	0.159936	0.00471788
BCAS2	0.792222	0.0895753	0.623826	1	1	1	0.0523791	0.910836	0.227109
BCAS3	2.24545	1.04965	1.15071	1	1	1	0.77529	0.145542	0.906437
BCAS4	1.3415	1.28593	0.616793	1	1	1	0.476609	0.430628	0.697721
BCAT1	2.4913	0.0298874	0.437457	0.214015	1	1	0.00192582	0.87405	0.365454
BCAT2	0.300827	0.0401722	0.00649288	1	1	1	0.654538	0.778089	0.816074
BCCIP	0.0349631	0.107824	0.067667	1	1	1	0.586965	0.698521	0.651739
BCHE	2.70156	0.556709	1.10992	1	1	1	0.790884	0.259096	0.876449
BCKDHA	0.460938	0.0601878	0.000253872	1	1	1	0.665734	0.610556	0.988405
BCKDHB	1.42705	0.0231093	0.724641	1	1	1	0.745302	0.7513	0.344262
BCKDK	0.784726	1.07383	1.37835	1	1	1	0.284286	0.363055	0.0331867
BCL10	0.86252	0.771561	0.240853	1	1	1	0.0839664	0.404638	0.338664
BCL11A	2.35243	1.12654	0.347839	0.060673	1	1	8.17289e-05	0.447421	0.464214
BCL11B	3.30324	1.00804	0.34955	0.103262	1	1	0.000509787	0.42543	0.798481
BCL2	0.100406	0.155553	0.0989288	1	1	1	0.882047	0.577769	0.647741
BCL2A1	0.287772	0.0513344	1.85408	1	1	1	0.816873	0.754498	0.103958
BCL2L1	0.146045	0.575658	1.76439	1	1	1	0.998401	0.333467	0.355458
BCL2L11	0.954986	1.234	0.0431056	1	1	1	0.762095	0.209516	0.759296
BCL2L12	0.0544036	0.964536	0.77931	1	1	1	0.956817	0.221511	0.0967613
BCL2L13	0.775502	0.0183395	0.224271	1	1	1	0.111155	0.858856	0.648541
BCL2L14	0.15071	1.52755	0.765008	1	1	1	0.483007	0.097561	0.34986
BCL2L15	2.44091	2.72088	0.159209	0.0469844	0.520137	1	1.85345e-05	0.00135985	0.938425
BCL2L2	0.400402	0.547658	1.60341	1	1	1	0.156337	0.20112	0.0271891
BCL6	2.19201	0.0542649	1.68973	1	1	1	0.892443	0.822471	0.393443
BCL6B	0.391327	1.08827	0.0490318	1	1	1	0.603758	0.243103	0.870452
BCL7A	0.373564	2.52109	0.0925406	1	1	1	0.0911635	0.0211915	0.563774
BCL7C	0.00129501	0.750568	0.022359	1	1	1	1	0.17593	0.9996
BCL9	0.988105	0.866911	0.246406	1	1	1	0.697721	0.283487	0.884846
BCLAF1	3.0562	7.07586	0.177065	1	1	1	0.330268	0.0115954	0.538185
BCMO1	0.0434202	1.63504	0.436942	1	1	1	0.985206	0.113954	0.466613
BCO2	0.346738	0.5446	0.641918	1	1	1	0.458617	0.772891	0.344662
BCR	0.196357	0.864678	0.730626	1	1	1	0.862855	0.376649	0.311475
BCYRN1	2.17218	0.120549	0.0447573	1	1	1	0.632147	0.706917	0.665734
BDH1	0.180278	0.148875	0.598349	1	1	1	0.983207	0.594562	0.485406
BDH2	0.101594	0.174738	0.697271	1	1	1	0.92603	0.812075	0.0279888
BDKRB1	0.1114	2.26015	0.403488	1	1	1	0.831267	0.257097	0.235106
BDKRB2	0.0247714	1.71783	1.3614	1	1	1	0.851659	0.195922	0.213914
BDNF	0.108159	0.600803	0.376151	1	1	1	0.889644	0.39904	0.217913
BDNFOS	0.0271723	0.1402	0.313797	1	1	1	0.67493	0.626549	0.164734
BDP1	1.2566	0.00120638	0.0371172	1	1	1	0.878449	0.962815	0.926829
BEGAIN	0.00120975	0.528829	0.0183818	1	1	1	0.962815	0.534186	0.691723
BEND3	0.639526	2.81839	0.0411257	1	1	1	0.896841	0.0187925	0.770892
BEND4	0.956118	0.0340942	1.10007	1	1	1	0.995602	0.70092	0.990404
BEND5	7.3506	1.25865	0.162829	0.18498	0.65825	1	0.00152326	0.00227122	0.739304
BEND6	2.32898	3.48208	0.523994	1	1	1	0.302279	0.0367853	0.932427
BEND7	0.0633632	0.114201	0.616498	1	1	1	0.962015	0.744902	0.382647
BEST1	13.8211	1.18004	0.726016	0.060673	1	1	8.43598e-05	0.378249	0.855258
BEST3	0.166317	0.27814	0.464366	1	1	1	0.558976	0.439424	0.37425
BEST4	2.1656	0.47831	1.1104	1	1	1	0.0451819	0.313075	0.0447821
BET1L	1.62578	0.868671	0.00783743	1	1	1	0.0135946	0.304678	0.854458
BFAR	0.0492721	0.64323	0.0473234	1	1	1	0.69972	0.532187	0.726509
BFSP1	0.430695	1.02333	0.0143383	1	1	1	0.92443	0.207117	0.994402
BFSP2	1.18978	0.413736	1.19219	1	1	1	0.594562	0.463415	0.301879
BHLHE40	0.326715	0.106346	0.244849	1	1	1	0.565374	0.690524	0.357457
BHLHE41	2.04548	0.195597	1.29872	1	1	1	0.629748	0.713315	0.917633
BHMT	1.55184	0.178122	0.9419	1	1	1	0.823271	0.395442	0.610956
BHMT2	3.12219	0.0182628	1.38351	1	1	1	0.203519	0.906837	0.321871
BICC1	2.23321	0.0632975	0.459876	1	1	1	0.862855	0.594962	0.595762
BICD1	0.102995	0.144909	0.490408	1	1	1	0.904838	0.568573	0.280288
BID	0.87858	1.40061	0.103216	1	1	1	0.137145	0.292283	0.538185
BIK	2.82334	6.16664	0.32153	0.0375871	0.300662	1	5.02382e-06	0.000189933	0.316273
BIN1	0.00874368	1.00214	0.00696394	1	1	1	0.938425	0.533786	0.864854
BIN2	0.415736	0.846223	0.12686	1	1	1	0.610156	0.413435	0.530988
BIN3	0.905906	0.544682	0.104452	1	1	1	0.572971	0.396641	0.734906
BIRC2	1.52316	1.22866	0.728736	1	1	1	0.886445	0.243902	0.520992
BIRC3	0.646124	1.71924	0.440346	1	1	1	0.499	0.254298	0.260696
BIRC5	0.0463607	0.818248	0.00893001	1	1	1	0.632947	0.258696	0.864454
BIRC6	0.00212742	0.116184	0.343845	1	1	1	0.973611	0.646541	0.456217
BIRC7	0.0298807	1.97852	0.375385	1	1	1	1	0.17473	0.271891
BIRC8	0.47408	1.40686	0.0369767	1	1	1	0.872051	0.185126	0.656537
BIVM	0.0956119	0.123098	0.0411282	1	1	1	0.744102	0.784886	0.739304
BLCAP	0.0900999	0.566288	2.20017	1	1	1	0.981607	0.27509	0.183127
BLK	0.536145	1.50702	0.231571	1	1	1	0.568972	0.144342	0.0387845
BLM	0.434349	1.40753	1.77284	1	1	1	0.964014	0.2487	0.166733
BLMH	0.140999	0.00275164	0.530866	1	1	1	0.972811	0.938425	0.253099
BLNK	0.0137608	2.38441	0.256174	1	1	1	0.933626	0.183127	0.307877
BLOC1S1	7.52243	0.251198	0.826349	1	1	1	0.0291883	0.302279	0.762495
BLVRA	0.476394	1.91452	0.796663	1	1	1	0.738505	0.0531787	0.171931
BLVRB	0.000100038	2.96455e-05	0.0929034	1	1	1	1	0.992403	0.939224
BLZF1	1.50244	0.69486	0.0342178	0.20376	1	1	0.00175789	0.470212	0.969212
BMF	0.207759	0.0814464	0.301718	1	1	1	0.708517	0.87485	0.336665
BMP1	0.295335	0.840752	0.0261992	1	1	1	0.89964	0.228309	0.942823
BMP10	0.511745	2.94056	0.851667	1	1	1	0.886445	0.204318	0.258696
BMP2	0.228367	0.296587	2.3561	1	1	1	0.467013	0.519792	0.00257043
BMP2K	1.21972	2.61185	0.148956	1	1	1	0.501	0.0991603	0.702519
BMP3	2.22118	0.0541722	1.76765	1	1	1	0.488605	0.77609	0.322271
BMP4	0.235665	0.242074	0.109745	1	1	1	0.590164	0.590964	0.371851
BMP5	0.134856	0.805816	0.126474	1	1	1	0.973211	0.542583	0.245102
BMP6	1.91646	0.193743	0.966616	0.0878369	1	1	0.000341058	0.741703	0.0143942
BMP7	0.350708	0.202989	0.0106557	1	1	1	0.955618	0.344662	0.972811
BMP8A	0.0613345	2.60928	0.000630422	1	1	1	0.854058	0.0115954	0.97441
BMP8B	2.60401	1.22453	0.501948	0.956464	1	1	0.0119952	0.0155938	0.29948
BMPER	2.02271	1.69989	0.070144	1	1	1	0.384246	0.122751	0.769292
BMPR1A	0.949713	0.540754	0.864013	1	1	1	0.268293	0.144742	0.254698
BMPR1B	0.00196373	0.651751	0.575366	1	1	1	0.9992	0.316273	0.589764
BMPR2	2.12273	0.0058757	0.658458	0.16015	1	1	0.00116397	0.930828	0.27469
BMS1	1.19134	0.072052	0.00877271	1	1	1	0.307877	0.896841	0.819272
BNC2	1.06133	0.0361703	0.0823733	1	1	1	0.0655738	0.785686	0.827669
BNIP1	1.25484	0.537286	0.0106647	1	1	1	0.0671731	0.52539	0.877249
BNIP2	8.08831	0.975849	0.230584	0.0643413	1	1	0.000108427	0.127949	0.716913
BNIP3L	1.45958	2.43526	1.53295	0.166514	1	1	0.00126713	0.119552	0.239904
BNIPL	2.29218	6.66754	1.22531	1	1	1	0.295082	0.168732	0.273091
BOC	0.474639	3.06281	0.0902472	1	1	1	0.0843663	0.12595	0.540984
BOK	0.692622	1.17108	0.691806	1	1	1	0.419832	0.559376	0.14914
BOLA3	0.214326	0.228688	0.0742786	1	1	1	0.816873	0.470212	0.786086
BOLL	0.037402	0.000105812	0.932242	1	1	1	0.90044	0.986405	0.381048
BOP1	0.0332484	0.601895	0.221607	1	1	1	0.984006	0.121151	0.854858
BPGM	6.41524	0.660712	1.37227	1	1	1	0.0143942	0.208317	0.867653
BPHL	0.365013	3.22133	0.701366	1	1	1	0.346661	0.0935626	0.0603759
BPI	3.90175	0.67824	1.03076	0.0631439	1	1	0.000100765	0.336665	0.00453923
BPIL1	0.711683	0.00229624	1.50439	1	1	1	0.994402	0.919632	0.554578
BPIL2	1.04711	0.617136	0.385482	1	1	1	0.985606	0.114754	0.897641
BPIL3	3.55673	0.3863	0.122365	0.0584796	1	1	6.59221e-05	0.370252	0.471411
BPNT1	0.422102	0.132486	0.338324	1	1	1	0.0583767	0.610156	0.47421
BPTF	3.78051	0.315577	0.0767955	0.0771699	1	1	0.000238764	0.452219	0.758497
BRAF	1.04854	1.45379	1.16274	1	1	1	0.963615	0.0983607	0.796082
BRAP	5.45367	0.229748	0.533289	1	1	1	0.0315874	0.134346	0.684126
BRCA1	1.71836	0.715502	0.115968	1	1	1	0.922431	0.269892	0.990804
BRCA2	0.227761	3.10876	0.0612052	1	0.752308	1	0.766893	0.00283045	0.810476
BRD1	1.7515	1.03942	0.0529568	1	1	1	0.808477	0.193922	0.89964
BRD2	0.282942	0.142509	0.0310185	1	1	1	0.866453	0.743303	0.662535
BRD3	0.211618	0.787791	0.158561	1	1	1	0.291883	0.7493	0.630148
BRD4	0.247776	0.022444	2.80136	1	1	1	0.52419	0.848061	0.12475
BRD7	0.71715	0.0792242	0.000186441	1	1	1	0.0451819	0.684126	0.984006
BRD8	1.2617	1.55618	1.79035	1	1	1	0.731307	0.209516	0.416233
BRD9	0.60261	1.25179	1.33387	1	1	1	0.691323	0.166733	0.266693
BRDT	0.000862296	0.0494768	0.0881544	1	1	1	0.970412	0.804478	0.564974
BRE	3.1614	0.0503156	0.488571	0.0628449	1	1	9.96656e-05	0.886046	0.103559
BRF1	2.40485	0.00326727	1.33065	1	1	1	0.913235	0.929228	0.914834
BRF2	0.623598	0.466294	0.0210477	1	1	1	0.114354	0.488205	0.940024
BRI3BP	0.440736	0.135454	0.00642792	1	1	1	0.639344	0.7509	0.914434
BRIP1	0.00826012	0.0146765	0.0257834	1	1	1	0.983207	0.87405	0.789284
BRMS1	4.84556	0.316324	1.19597	1	1	1	0.0167933	0.572571	0.932827
BRMS1L	0.42536	2.46205	0.58583	1	1	1	0.302279	0.0543783	0.190324
BRP44	0.570143	0.218048	0.0648177	1	1	1	0.593363	0.384646	0.69892
BRP44L	0.555133	3.29844	0.195408	1	1	1	0.940024	0.0107957	0.912435
BRPF1	0.200984	1.11235	0.464017	1	1	1	0.9996	0.690124	0.12395
BRPF3	3.43607	3.70816	0.704577	1	1	1	0.35106	0.0215914	0.37385
BRSK1	0.034845	0.137342	1.25579	1	1	1	0.927229	0.926829	0.0131947
BRSK2	0.292267	0.00913125	0.508602	1	1	1	0.279088	0.921231	0.210316
BRUNOL4	0.13264	0.365253	0.201224	1	1	1	0.983607	0.354658	0.77609
BRUNOL5	2.49305	1.53787	0.343303	0.208334	1	1	0.00182737	0.310676	0.276289
BRUNOL6	1.49252	0.129389	0.110624	1	1	1	0.14914	0.720112	0.472211
BRWD1	1.32186	1.52799	0.0132238	0.481893	1	1	0.00559905	0.163135	0.807277
BRWD2	0.334641	0.118797	0.296415	1	1	1	0.934426	0.634546	0.29988
BSDC1	4.56691	0.386859	0.345898	1	1	1	0.0607757	0.190324	0.618952
BSN	0.0100415	1.18433	1.8074	1	1	1	0.995202	0.218712	0.233107
BSND	0.0598113	0.0343802	0.139454	1	1	1	0.989204	0.822471	0.677329
BSPH1	0.626136	1.48865	0.799663	1	1	1	0.794082	0.179528	0.251899
BSPRY	0.127947	8.07923	0.0118824	1	1	1	0.962015	0.0211915	0.94922
BST1	3.50028	0.0853172	0.0285409	0.15304	1	1	0.00108151	0.816873	0.646941
BST2	10.4412	0.895532	3.43072	0.134152	1	1	0.00085581	0.459016	0.00614465
BSX	2.36804	0.0862064	0.402011	1	1	1	0.196721	0.829268	0.112755
BTAF1	0.000810265	0.241258	0.00347924	1	1	1	0.984006	0.60056	0.992403
BTBD1	1.05247	1.71639	0.0948288	0.304402	1	1	0.00317322	0.0191923	0.430628
BTBD10	1.84744	0.357602	0.353444	1	1	1	0.0243902	0.384246	0.226709
BTBD11	6.60818e-05	0.729381	0.308641	1	1	1	0.997201	0.32507	0.226309
BTBD12	0.0951605	1.01133	0.371257	1	1	1	0.484606	0.284286	0.258696
BTBD16	0.616048	1.94264	0.47598	1	1	1	0.356657	0.489404	0.0627749
BTBD17	3.70895	0.114277	1.8864	1	1	1	0.521391	0.485806	0.047581
BTBD2	1.2252	0.0029451	0.402965	1	1	1	0.640144	0.952419	0.42423
BTBD3	1.08962	0.984544	0.408709	1	1	1	0.20072	0.271092	0.286285
BTBD7	2.22626	1.47096	0.00552918	1	1	1	0.67453	0.132347	0.844062
BTBD8	0.0504414	3.68073	0.312023	1	1	1	0.919632	0.079968	0.607757
BTBD9	0.597458	3.71151	0.0427866	1	1	1	0.123551	0.113155	0.677329
BTC	0.0344936	0.156565	0.832456	1	1	1	0.922031	0.705318	0.558177
BTD	0.00940585	1.52335	0.0173671	1	1	1	0.94922	0.103958	0.806877
BTF3L4	1.95248	3.17485	0.995174	1	1	1	0.540184	0.166733	0.930828
BTG1	0.0108362	0.83964	0.316432	1	1	1	0.834066	0.205518	0.316673
BTG2	0.592992	0.114438	0.596702	1	1	1	0.0851659	0.708916	0.107557
BTG3	2.98631	0.0442331	0.521447	1	1	1	0.345062	0.778089	0.469012
BTG4	1.85562	0.0796234	0.192048	1	1	1	0.603758	0.764094	0.161935
BTLA	1.04263	0.966241	1.01484	1	1	1	0.171531	0.473011	0.206317
BTN1A1	1.33178	2.31222	0.160044	1	0.621513	1	0.194322	0.0020373	0.584566
BTN2A1	3.73211	1.63693	1.90897	1	1	1	0.194322	0.163535	0.754498
BTN2A2	3.74164	3.04422	0.945632	1	1	1	0.103958	0.0763695	0.893243
BTN3A1	0.630907	0.114203	0.60488	1	1	1	0.996801	0.54978	0.889244
BTN3A2	1.54189	0.0451641	3.20763	0.196244	1	1	0.0016655	0.778888	0.000578363
BTN3A3	3.71052	1.71121	1.1954	1	1	1	0.0947621	0.190724	0.860856
BTNL2	0.358449	2.0776	0.497429	1	1	1	0.595762	0.103559	0.231507
BTNL9	2.36381e-07	0.364468	0.105093	1	1	1	0.998001	0.581367	0.45022
BTRC	4.26434	2.29844	0.106373	0.110899	1	1	0.000597531	0.0255898	0.634946
BUB1	0.0132963	13.8678	0.0649704	1	1	1	0.840464	0.0103958	0.566973
BUB1B	0.943657	0.0724623	0.637036	1	1	1	0.0523791	0.758896	0.0683727
BUB3	0.0368344	0.2191	0.0587153	1	1	1	0.758497	0.892443	0.691723
BUD13	2.67702e-06	0.283847	0.0574828	1	1	1	1	0.432627	0.680128
BUD31	1.60365	1.01857	0.496858	1	1	1	0.977609	0.158737	0.915634
BVES	4.52642	2.06771	1.83813	1	1	1	0.0715714	0.118353	0.572171
BXDC1	2.9539	1.43677	0.253733	0.0913543	1	1	0.000373411	0.0655738	0.448221
BXDC2	1.94137	1.98085	1.06221	0.290741	1	1	0.00299224	0.0291883	0.0587765
BXDC5	0.0378132	0.0764229	0.121116	1	1	1	0.957217	0.741703	0.972011
BYSL	1.2988	0.0302441	0.397213	1	1	1	0.839664	0.864854	0.569772
BZRAP1	0.527435	5.27529	0.145439	1	1	1	0.657337	0.0463814	0.392243
BZW1	1.24639	0.234763	0.00863989	1	1	1	0.261895	0.387045	0.891243
BZW2	1.39348	0.00235393	0.181339	1	1	1	0.987605	0.931627	0.768493
C10orf104	0.645682	0.0649343	0.302885	1	1	1	0.0435826	0.745702	0.217513
C10orf107	5.9215	4.97369	0.0559871	0.071997	0.361076	1	0.000185977	0.000499556	0.617753
C10orf11	1.65485	0.0143569	0.0288558	0.58518	1	1	0.00692338	0.87365	0.634946
C10orf111	2.83761	0.169183	2.59253	1	1	1	0.481008	0.721311	0.262295
C10orf113	0.00218596	0.0360487	0.313912	1	1	1	0.943223	0.779688	0.345462
C10orf114	5.45042	2.55514	0.139514	1	0.300662	1	0.0215914	0.000106467	0.993603
C10orf116	0.0756565	0.706143	0.834936	1	1	1	0.607357	0.307077	0.0479808
C10orf118	0.120155	3.78147	0.929675	1	1	1	0.822471	0.181527	0.32587
C10orf119	0.109016	0.513495	1.04201	1	1	1	0.710116	0.538984	0.227909
C10orf12	0.905897	2.31776	0.574863	1	0.521263	1	0.0315874	0.00136971	0.132747
C10orf120	0.0841831	0.0497491	0.0508746	1	1	1	0.441823	0.641343	0.787685
C10orf122	0.255792	1.16793	0.367937	1	1	1	0.313075	0.139144	0.705718
C10orf128	0.222407	1.23081	0.650994	1	1	1	0.901639	0.45062	0.0551779
C10orf129	4.47311	0.000538105	0.0103416	0.0751805	1	1	0.000212778	0.986006	0.82567
C10orf137	0.0161698	1.16616	0.359561	1	1	1	0.918832	0.129948	0.0787685
C10orf139	0.738373	4.27863	0.0759902	1	1	1	0.440224	0.0119952	0.711715
C10orf141	0.273994	1.27914	0.0311374	1	1	1	0.952019	0.269492	0.860056
C10orf18	3.87004e-05	0.0584371	0.818807	1	1	1	0.994402	0.876449	0.15074
C10orf2	4.13268	0.0216286	0.0927977	1	1	1	0.0243902	0.843662	0.755298
C10orf26	4.6777	0.0974619	0.461486	0.0785201	1	1	0.000260821	0.622151	0.626549
C10orf27	0.242286	1.19089	1.3182	1	1	1	0.117553	0.555378	0.172731
C10orf28	0.113263	0.542104	0.032267	1	1	1	0.84926	0.598561	0.811275
C10orf32	7.41228e-05	7.15226	0.433403	1	1	1	0.990804	0.0227909	0.204718
C10orf33	0.00137913	1.98195	0.0881456	1	1	1	0.928828	0.243503	0.45102
C10orf35	5.22099	5.21377	0.573773	0.0849412	0.300662	1	0.000310561	0.000223501	0.309876
C10orf4	0.297101	1.28915	0.454329	1	1	1	0.571771	0.262295	0.343862
C10orf46	0.524409	19.692	0.872612	1	0.867484	1	0.356258	0.00362067	0.278689
C10orf47	1.56348	0.706194	0.613943	1	1	1	0.948421	0.215114	0.712915
C10orf49	0.707841	0.0012344	0.0299574	1	1	1	0.166733	0.981208	0.854458
C10orf53	1.17527	0.400403	0.178116	1	1	1	0.279088	0.611755	0.590164
C10orf54	0.408818	0.167356	0.312369	1	1	1	0.121151	0.558577	0.331068
C10orf57	0.546978	0.117958	0.973399	0.310285	1	1	0.00326338	0.62575	0.318672
C10orf58	4.06949	1.72771	0.258727	0.075644	1	1	0.000221356	0.0759696	0.235906
C10orf59	0.00185014	0.567628	0.000449606	1	1	1	0.987205	0.19872	0.986805
C10orf62	0.0286604	11.0377	0.53323	1	1	1	0.870452	0.0319872	0.440224
C10orf65	2.14374	0.0522562	0.466974	1	1	1	0.12595	0.92603	0.489804
C10orf67	8.46577	2.98411	0.621112	0.149424	1	1	0.00104605	0.0219912	0.319072
C10orf68	0.13529	0.0921183	0.537821	1	1	1	0.668932	0.528988	0.282287
C10orf71	0.942174	0.388652	1.20102	1	1	1	0.0219912	0.392243	0.142343
C10orf72	0.23139	1.33423	0.960672	1	1	1	0.998401	0.338265	0.0435826
C10orf76	0.50755	2.33418	0.39304	1	1	1	0.465414	0.141943	0.111955
C10orf79	1.14086	0.00270647	0.196267	1	1	1	0.959216	0.960016	0.227109
C10orf81	0.00538575	0.329198	0.0149587	1	1	1	0.998401	0.557377	0.688924
C10orf82	1.04092	1.35286	0.906391	0.226929	1	1	0.00209457	0.786485	0.587365
C10orf84	0.204918	0.0503802	0.851167	1	1	1	0.459816	0.832867	0.0303878
C10orf88	1.04664	6.71952	1.41257	1	1	1	0.172731	0.0283886	0.119552
C10orf90	0.48723	1.83178	0.115164	1	1	1	0.935626	0.0651739	0.838065
C10orf93	0.0900963	0.205582	0.0139956	1	1	1	0.953619	0.55018	0.819672
C10orf96	1.2044	0.00410722	0.126195	1	1	1	0.115554	0.894042	0.447421
C10orf97	2.88222	2.08426	1.15592	1	1	1	0.535386	0.180728	0.923231
C10orf99	0.0325972	0.261605	0.434411	1	1	1	0.988804	0.551779	0.615354
C11orf10	0.00876731	4.54586	0.395049	1	0.474127	1	0.786885	0.00108947	0.141144
C11orf16	1.77892	1.68899	1.92061	0.137408	1	1	0.000892767	0.0779688	0.0203918
C11orf17	0.119003	0.0591142	0.00132307	1	1	1	0.810076	0.747701	0.934826
C11orf2	0.000733214	0.430481	0.112187	1	1	1	0.964014	0.466613	0.778888
C11orf24	3.66167	0.269436	1.63734	1	1	1	0.122751	0.330268	0.142743
C11orf30	0.257859	0.87522	1.59785	1	1	1	0.959216	0.240704	0.089964
C11orf31	0.216645	6.50349	0.0347576	1	1	1	0.82447	0.0679728	0.958816
C11orf35	0.104878	1.31684	0.142061	1	1	1	0.583766	0.366254	0.313875
C11orf40	2.21002	13.8469	0.00718513	1	1	1	0.236705	0.0127949	0.979608
C11orf41	0.508295	0.168334	1.59458	1	1	1	0.946022	0.760496	0.000849601
C11orf42	0.950136	2.67125	0.154805	1	1	1	0.803279	0.179928	0.683727
C11orf45	1.07968	0.0156693	0.0217811	1	1	1	0.45102	0.907237	0.776889
C11orf46	4.96922	1.06532	0.546386	0.0487494	1	1	2.93444e-05	0.383047	0.0711715
C11orf48	0.673777	0.0109097	0.256597	1	1	1	0.311875	0.965614	0.242303
C11orf49	2.74833	0.11012	0.0182307	0.173628	1	1	0.0013595	0.79888	0.807277
C11orf51	0.875425	0.0495972	0.189941	1	1	1	0.504998	0.648141	0.908037
C11orf53	0.0174274	0.0518127	0.215646	1	1	1	0.930428	0.82567	0.585366
C11orf58	0.0850866	0.43105	3.14383	1	1	1	0.461016	0.520192	0.0295882
C11orf59	0.274041	10.4506	0.00881028	1	1	1	0.37505	0.0155938	0.814474
C11orf60	1.67111	2.17615	0.248979	1	1	1	0.0991603	0.0303878	0.608557
C11orf61	3.80943	1.41838	1.13988	1	1	1	0.190324	0.0755698	0.701319
C11orf63	0.584795	0.308201	0.0984922	1	1	1	0.941223	0.742103	0.403039
C11orf65	0.14993	0.0082022	1.10228	1	1	1	0.948421	0.908037	0.12635
C11orf66	0.0341238	1.81791	0.0268004	1	1	1	1	0.0207917	0.992403
C11orf67	1.70922	7.53982	0.214267	1	1	1	0.614954	0.0115954	0.52499
C11orf70	3.39757	0.97609	0.490993	0.0871244	1	1	0.000327794	0.713714	0.203918
C11orf73	1.24029	2.33941	0.198188	0.257772	1	1	0.00249557	0.414634	0.628549
C11orf74	0.251675	0.106343	0.0604847	1	1	1	0.317073	0.760896	0.631347
C11orf75	0.000500927	2.28632	0.123646	1	1	1	0.9988	0.0739704	0.752499
C11orf80	1.08779	0.653435	1.09556	1	1	1	0.861255	0.167933	0.481008
C11orf82	0.000386355	0.901536	1.24464	1	1	1	0.992803	0.273491	0.0107957
C11orf83	0.673777	0.0109097	0.256597	1	1	1	0.279888	0.972011	0.255098
C11orf84	0.0458011	0.398455	0.103	1	1	1	0.9996	0.115554	0.969612
C11orf85	9.32906	0.355656	0.0209727	0.071997	1	1	0.000188892	0.588964	0.87365
C11orf88	5.00089	0.175598	1.05969	0.305729	1	1	0.00319315	0.506197	0.181127
C11orf9	0.170432	0.387501	0.0154837	1	1	1	0.959616	0.196321	0.897641
C12orf11	0.0122441	0.625456	0.383357	1	1	1	0.87525	0.559376	0.204318
C12orf23	0.987633	1.01395	1.1257	1	1	1	0.295882	0.630148	0.0679728
C12orf24	0.284065	0.37157	0.344161	1	1	1	0.917633	0.698121	0.2487
C12orf26	1.45611	12.7824	1.0037	1	1	1	0.667733	0.0119952	0.670132
C12orf29	3.43555	10.1656	1.25597	1	1	1	0.0835666	0.0895642	0.339864
C12orf30	7.37406	0.240201	0.675145	1	1	1	0.0207917	0.561775	0.311875
C12orf34	2.10743	0.00910459	0.468481	1	1	1	0.0263894	0.943623	0.506197
C12orf35	0.455146	0.0555725	0.543513	1	1	1	0.622151	0.917233	0.263495
C12orf36	0.261597	0.0299141	0.000325476	1	1	1	0.162735	0.604558	0.935626
C12orf39	0.873089	0.377376	0.182051	1	1	1	0.935226	0.516593	0.7497
C12orf4	1.17978	10.2885	0.475109	1	1	1	0.718113	0.009996	0.952819
C12orf40	1.02782	1.13174	0.310639	1	1	1	0.211515	0.227509	0.473011
C12orf41	0.373266	0.764177	1.06811	1	1	1	0.309076	0.386645	0.180728
C12orf42	0.117562	0.937622	0.465598	1	1	1	0.984006	0.09996	0.209116
C12orf43	1.28922	1.09382	0.957636	1	1	1	0.077569	0.347461	0.00341555
C12orf44	0.00260604	0.12801	0.178112	1	1	1	0.994402	0.522991	0.746501
C12orf45	0.390633	7.57275	0.0101039	1	1	1	0.777689	0.0103958	0.914834
C12orf48	2.92811	1.06523	0.154024	1	1	1	0.253499	0.316273	0.347861
C12orf49	0.429565	0.577055	0.0545084	1	1	1	0.917633	0.371052	0.870052
C12orf5	0.433123	0.18215	0.485609	1	1	1	0.151139	0.702519	0.233107
C12orf50	3.53597	0.410486	1.7948	1	1	1	0.445022	0.396641	0.731707
C12orf51	12.9804	3.25084	0.369376	0.176271	0.566341	1	0.00140266	0.0016854	0.72371
C12orf52	2.28531	2.40841	0.441578	0.0631746	1	1	0.000101984	0.0419832	0.479008
C12orf54	2.53564	1.52779	0.212499	0.279742	1	1	0.00280107	0.0511795	0.510996
C12orf56	1.96739	0.0689523	0.00884887	1	1	1	0.373051	0.711715	0.704918
C12orf57	0.106996	0.00585409	0.622877	1	1	1	0.878848	0.917233	0.381847
C12orf59	0.0354339	0.0547027	0.547091	1	1	1	0.746501	0.771292	0.326269
C12orf60	3.07238	0.535915	0.342515	0.0674576	1	1	0.000139993	0.444222	0.354258
C12orf62	1.738	0.92229	0.046435	1	1	1	0.039984	0.115154	0.782087
C12orf63	1.24482	1.46803	0.181945	0.93447	1	1	0.0115954	0.306677	0.269892
C12orf65	1.37799	0.367044	0.290731	1	1	1	0.911635	0.577369	0.986805
C12orf66	1.68218	2.45775	0.501505	1	1	1	0.289084	0.289884	0.302279
C12orf68	4.58717	0.0163319	0.060254	0.180678	1	1	0.00145314	0.870852	0.77409
C12orf69	4.09488	0.0526355	0.13725	0.060673	1	1	8.27275e-05	0.782087	0.572971
C12orf71	3.68546	0.53168	0.00551508	1	1	1	0.0303878	0.190324	0.957217
C12orf72	2.10576	0.518042	0.172405	0.477013	1	1	0.00553285	0.534986	0.94922
C13orf1	2.56158	4.58271	0.0253079	0.223236	0.490168	1	0.00205011	0.00116116	0.620952
C13orf15	0.819835	0.4524	0.142484	1	1	1	0.536185	0.37545	0.82367
C13orf16	1.7585	3.25874	0.00186467	0.126708	1	1	0.00075418	0.00484163	0.9992
C13orf18	0.803543	0.372854	0.0644278	1	1	1	0.0695722	0.491803	0.651339
C13orf23	0.226182	2.13579	2.58312	1	1	1	0.547381	0.2503	0.103559
C13orf26	0.245955	3.14863	0.578118	1	0.521517	1	0.943223	0.00139279	0.521391
C13orf27	3.71411	0.219468	0.539384	0.127882	1	1	0.000770923	0.773291	0.165134
C13orf28	3.92468	0.416194	0.00211054	0.982627	1	1	0.012395	0.389844	0.931227
C13orf3	0.000119244	0.046806	0.932401	1	1	1	1	0.929628	0.037585
C13orf30	0.00210632	0.308885	0.135348	1	1	1	0.996002	0.32467	0.856457
C13orf31	0.625713	0.37265	0.0475767	1	1	1	0.648541	0.605758	0.583367
C13orf33	0.0927009	0.0241462	1.03612	1	1	1	0.621751	0.947221	0.0587765
C13orf34	0.0416965	0.295934	0.657044	1	1	1	0.981208	0.272291	0.476609
C13orf35	0.00162322	1.55699	0.0196893	1	1	1	0.992003	0.109556	0.865254
C13orf36	0.894444	1.73756	1.90211	1	1	1	0.0239904	0.506597	0.0407837
C13orf37	0.0851461	0.00165365	0.559414	1	1	1	0.9988	0.961615	0.65014
C13orf39	0.736081	1.64202	0.0176071	1	1	1	0.396641	0.316273	0.823271
C14orf100	1.42186	1.44022	0.582541	1	1	1	0.198321	0.164334	0.17593
C14orf101	0.00423122	0.25086	0.00400733	1	1	1	1	0.381447	0.987605
C14orf102	0.386962	1.94638	0.323336	1	1	1	0.919232	0.0535786	0.184326
C14orf104	12.0854	0.0433555	0.367141	0.051196	1	1	3.63494e-05	0.766094	0.12595
C14orf105	0.0168524	0.831266	0.120741	1	1	1	0.990804	0.171931	0.70012
C14orf106	2.0719	4.06555	1.28831	1	1	1	0.501799	0.04998	0.595762
C14orf109	0.0920209	0.487195	0.594546	1	1	1	0.436625	0.452219	0.168333
C14orf115	1.57024	0.187501	0.511125	1	1	1	0.961615	0.42383	0.441024
C14orf118	0.148127	0.510518	0.000864911	1	1	1	0.910036	0.62615	0.979608
C14orf126	0.00420882	0.010138	0.986748	1	1	1	0.954418	0.914834	0.0955618
C14orf129	1.59696	3.39166	0.0500241	0.160711	1	1	0.00118268	0.0167933	0.804478
C14orf133	6.42372	4.00418	0.704184	0.0487494	0.42998	1	3.04471e-05	0.000818856	0.0451819
C14orf135	1.578	12.463	0.283634	1	1	1	0.530188	0.0115954	0.734906
C14orf138	0.162348	0.203062	0.00230285	1	1	1	0.452219	0.628948	0.920032
C14orf143	0.39179	0.00513996	1.10217	1	1	1	0.0619752	0.87605	0.398641
C14orf145	0.50764	0.762376	1.20023	1	1	1	0.9996	0.168732	0.000366087
C14orf147	0.673125	2.22287	0.351648	1	1	1	0.942023	0.0419832	0.843263
C14orf148	0.410513	0.979156	0.191333	1	1	1	0.948021	0.128349	0.985206
C14orf149	1.38726	0.0552471	0.223579	1	1	1	0.290284	0.777289	0.661335
C14orf151	1.41012	0.808598	0.543052	1	1	1	0.459416	0.495002	0.633347
C14orf153	0.0550079	0.117338	0.466414	1	1	1	0.773291	0.556577	0.497401
C14orf156	0.0149969	2.3528	0.000622646	1	1	1	0.860456	0.121151	0.97401
C14orf159	0.612382	0.0702402	0.317328	1	1	1	0.9992	0.701719	0.996801
C14orf166	1.23345	0.0820652	0.0303781	1	1	1	0.110356	0.688525	0.771292
C14orf166B	0.140093	1.79068	0.000372062	1	1	1	0.972411	0.119152	0.984406
C14orf167	2.0155	0.0210838	1.72641	1	1	1	0.580568	0.922431	0.489004
C14orf174	1.92684	1.68202	0.000495606	0.88469	1	1	0.0107957	0.0391843	0.9992
C14orf177	1.57541	5.48333	0.0175027	0.354064	0.324496	1	0.00386478	0.000370782	0.832067
C14orf178	0.742052	0.112086	0.274857	1	1	1	0.289484	0.439824	0.59896
C14orf179	1.72588	0.262861	0.0163357	1	1	1	0.539784	0.493802	0.914034
C14orf180	0.0938007	1.52812	0.370931	1	1	1	0.777689	0.286685	0.65054
C14orf181	4.02938e-05	0.192247	2.28692	1	1	1	0.994002	0.77369	0.00124387
C14orf2	0.547334	0.739822	0.0291741	1	1	1	0.811675	0.590564	0.958816
C14orf21	2.82131	0.850818	0.565162	1	1	1	0.0135946	0.157137	0.711715
C14orf37	0.641533	0.628824	3.45119e-06	1	1	1	0.29948	0.529788	0.997201
C14orf39	0.470534	4.63049	0.367133	1	1	1	0.563774	0.0631747	0.172331
C14orf4	2.69436e-05	1.23398	0.00158288	1	1	1	0.993203	0.405038	0.896841
C14orf43	0.667079	1.67385	0.00249691	1	1	1	0.0879648	0.0507797	0.895242
C14orf45	1.11338	1.96787	0.000332543	1	1	1	0.102359	0.0907637	0.992803
C14orf49	0.00380355	0.0284262	0.155135	1	1	1	0.998001	0.856857	0.330668
C14orf50	0.00394034	0.458676	0.242268	1	1	1	0.991203	0.559776	0.682927
C14orf73	0.0321464	0.00242415	0.00671756	1	1	1	0.556577	0.942423	0.923231
C14orf79	6.93432	0.773198	0.00175351	0.0643413	1	1	0.00010665	0.370652	0.92363
C14orf83	0.24361	0.889913	0.679042	1	1	1	0.978808	0.087565	0.57497
C14orf85	0.00552602	0.0744877	0.746329	1	1	1	0.9996	0.784086	0.0107957
C14orf93	0.176692	0.101313	0.0113637	1	1	1	0.9992	0.819672	0.771292
C14orf94	0.668573	0.346212	0.452389	1	1	1	0.9996	0.191124	0.620152
C15orf15	3.33854	0.911407	0.397654	1	1	1	0.185926	0.558976	0.863654
C15orf17	0.157377	2.115	2.38689	1	1	1	0.668533	0.139144	0.121551
C15orf2	0.113056	14.2624	0.0158017	1	0.590339	1	0.722111	0.0018332	0.882047
C15orf21	0.353226	0.889798	0.224862	1	1	1	0.301479	0.42383	0.377849
C15orf23	0.628489	7.30685	1.42794	1	0.461982	1	0.27589	0.00102827	0.00493085
C15orf24	1.89599	0.00494219	0.399404	1	1	1	0.118752	0.936026	0.0603759
C15orf26	5.05305	0.305334	1.54626	1	1	1	0.218712	0.167533	0.684926
C15orf27	0.189709	0.417996	0.988805	1	1	1	0.562575	0.505398	0.0163934
C15orf29	2.21791	3.9304	0.0148468	1	1	1	0.602959	0.039984	0.968812
C15orf32	1.28783	0.930214	0.130072	1	1	1	0.654138	0.309876	0.828469
C15orf33	0.432944	0.0192108	0.457234	1	1	1	0.14874	0.937225	0.183527
C15orf38	0.413041	1.44318	0.0258577	1	1	1	0.807677	0.188325	0.945222
C15orf39	1.08001	0.0557097	0.327503	1	1	1	0.22591	0.922831	0.641343
C15orf41	0.747038	0.825905	0.00317138	1	1	1	0.915634	0.30068	0.988804
C15orf42	0.496968	3.19762	0.0512784	1	1	1	0.30028	0.0863654	0.809276
C15orf43	0.524952	2.79091	0.521231	1	1	1	0.0247901	0.27549	0.816873
C15orf53	2.52656	0.145578	0.0230099	0.431177	1	1	0.00492968	0.718113	0.881647
C15orf54	2.50075	1.01482	0.000658138	1	1	1	0.0595762	0.0639744	0.954818
C15orf55	0.675937	0.881918	0.610218	1	1	1	0.22471	0.267093	0.411435
C15orf57	11.7157	2.03417	0.000931064	0.14609	1	1	0.00100079	0.0667733	0.946421
C15orf58	0.156741	0.0616611	0.405583	1	1	1	0.816873	0.786086	0.680928
C15orf59	1.32016	0.313617	0.000105558	1	1	1	0.390244	0.392243	0.998401
C15orf60	3.89424	4.2145	1.03448	1	1	1	0.0651739	0.122351	0.412635
C16orf11	0.457094	1.11018	5.34028	1	1	1	0.285486	0.12395	0.0331867
C16orf35	1.47173	0.006397	0.453442	1	1	1	0.658137	0.929228	0.179128
C16orf38	0.184018	1.4854	0.00163849	1	1	1	1	0.279488	0.933227
C16orf42	0.341017	0.418454	0.764453	1	1	1	0.0747701	0.338664	0.122351
C16orf45	0.145017	0.95914	0.497287	1	1	1	0.620552	0.280688	0.153139
C16orf46	1.70236	3.66767	1.6751	1	1	1	0.221511	0.114354	0.0251899
C16orf5	2.07	0.861725	0.895966	1	1	1	0.422231	0.243902	0.000584345
C16orf53	2.22006	6.33356	0.575077	1	1	1	0.546581	0.0331867	0.981208
C16orf55	14.5502	4.98414	1.82635	0.0375871	0.478712	1	4.21862e-06	0.00111879	0.0639744
C16orf57	0.00302286	0.468721	1.96056	1	1	1	0.978009	0.203918	0.0171931
C16orf59	0.00669665	0.85766	0.0190043	1	1	1	0.9996	0.136745	0.9996
C16orf61	0.260336	11.3545	0.0450168	1	0.431529	1	0.319472	0.000842924	0.728908
C16orf62	0.18792	0.670001	0.0324911	1	1	1	0.987605	0.27509	0.808477
C16orf63	0.648062	1.40968	0.0653305	1	1	1	0.191923	0.183127	0.648141
C16orf68	0.628932	0.0405662	0.504191	1	1	1	0.285086	0.771292	0.323871
C16orf7	8.46153	0.822755	0.739775	0.271556	1	1	0.00267045	0.0191923	0.853259
C16orf70	1.32498	0.1564	1.81055	1	1	1	1	0.556577	0.417033
C16orf71	0.335668	0.262251	2.03761	1	1	1	0.980408	0.437025	0.00436463
C16orf72	1.40659	0.000541034	0.87519	1	1	1	0.433827	0.983607	0.608157
C16orf73	0.0771023	0.0873559	2.57105	1	1	1	0.770892	0.865254	0.120352
C16orf74	1.1119	0.0366466	0.00769162	0.173628	1	1	0.00135919	0.738904	0.801679
C16orf75	1.95491	0.274068	0.535086	0.145064	1	1	0.00098761	0.643343	0.230308
C16orf78	1.20239	0.769704	1.37905e-05	1	1	1	0.733307	0.318672	0.9992
C16orf80	0.168808	0.0867471	6.98976e-05	1	1	1	0.920832	0.656937	0.982407
C16orf84	2.39654	0.281716	0.0717311	0.0820721	1	1	0.000283189	0.57417	0.738505
C16orf87	1.06541	2.02741	1.97551	1	1	1	0.670532	0.135946	0.135946
C16orf88	0.973702	1.26307	1.00551	1	1	1	0.259496	0.463415	0.180728
C16orf89	0.0130871	3.25238	0.541338	1	0.90631	1	0.988804	0.00384287	0.0635746
C16orf91	0.0112527	0.336847	0.0327012	1	1	1	0.89884	0.118752	0.448621
C17orf101	5.65932	2.15855	0.0891747	0.0685227	1	1	0.000151135	0.0827669	0.422231
C17orf102	0.39199	0.267283	0.0373268	1	1	1	0.141943	0.383047	0.764894
C17orf28	5.0906	0.0175088	0.222831	1	1	1	0.0267893	0.855658	0.419832
C17orf39	9.71895	0.000373282	0.128699	0.110503	1	1	0.000592465	0.986405	0.496201
C17orf42	0.00602489	0.347101	0.0876081	1	1	1	0.830868	0.518593	0.670532
C17orf46	0.906731	0.0707087	0.134872	1	1	1	0.415034	0.605758	0.681327
C17orf48	1.40865	2.08115	0.293848	1	1	1	0.478209	0.180328	0.388245
C17orf49	0.0156581	5.00416	0.341509	1	1	1	0.770892	0.0743702	0.337465
C17orf51	0.541575	0.0012255	1.30849	1	1	1	0.981208	0.951219	0.763295
C17orf53	7.88401	0.00290304	5.65346e-05	0.0899763	1	1	0.000363599	0.908037	0.985606
C17orf57	2.6287	0.0602434	1.94346	0.16312	1	1	0.00120795	0.769292	0.00256274
C17orf58	2.03442	6.62979	0.269487	1	0.54026	1	0.0555778	0.00150375	0.281887
C17orf59	0.727	0.0046104	0.0349909	1	1	1	0.0307877	0.965614	0.7489
C17orf60	0.319435	0.0471792	0.381601	1	1	1	0.9996	0.82447	0.792083
C17orf62	0.0200618	0.144312	0.577827	1	1	1	0.856457	0.87445	0.397441
C17orf63	3.1859	1.68009	0.983667	1	1	1	0.336265	0.0923631	0.454618
C17orf64	3.48529	0.132869	1.3524	1	1	1	0.162335	0.696521	0.267893
C17orf65	6.70477	2.92657	0.410945	0.0643413	1	1	0.000115374	0.121951	0.187525
C17orf66	0.226586	17.0513	0.287891	1	1	1	0.508996	0.0151939	0.439824
C17orf67	1.08592	1.7886	1.46353	0.286679	1	1	0.00290415	0.689724	0.127549
C17orf68	1.04081	0.49689	0.00250417	1	1	1	0.237905	0.305478	0.938425
C17orf70	0.511155	0.737286	0.0626475	1	1	1	0.227909	0.616953	0.806078
C17orf71	0.726882	0.250049	0.308343	1	1	1	0.331867	0.706517	0.641743
C17orf74	16.5247	0.332752	0.512018	0.0589018	1	1	7.37955e-05	0.512995	0.414634
C17orf75	0.0424307	0.668695	1.85173	1	1	1	0.986405	0.233906	0.259896
C17orf76	2.5707	1.83547	0.180959	0.0763473	1	1	0.000224912	0.0879648	0.714514
C17orf77	2.42066	0.74873	1.58989	1	1	1	0.489004	0.39984	0.303878
C17orf78	4.54007	4.42451	0.0283304	0.157474	0.314545	1	0.00112852	0.000331862	0.678129
C17orf80	0.881838	2.4612	0.0168504	1	1	1	0.618153	0.243902	0.886845
C17orf85	0.91569	0.0540029	0.331527	1	1	1	0.133946	0.77609	0.0307877
C17orf87	1.09443	0.452548	8.77365e-05	1	1	1	0.104358	0.248301	0.996801
C17orf98	0.0683793	0.0168088	3.1699	1	1	1	0.632547	0.90004	0.0535786
C18orf1	0.0243075	1.49755	3.95447e-06	1	1	1	0.989604	0.140344	0.996401
C18orf10	0.597189	0.470948	0.771538	1	1	1	0.917633	0.489004	0.592563
C18orf19	0.000452201	0.194492	0.0853277	1	1	1	0.9996	0.605758	0.892443
C18orf2	1.54361	1.29692	0.0306794	1	1	1	0.647341	0.235106	0.663335
C18orf21	0.972472	4.73195	0.690585	1	1	1	0.181527	0.0251899	0.420232
C18orf22	0.169957	0.750076	0.33278	1	1	1	0.456617	0.319072	0.503798
C18orf24	0.44786	0.0534811	0.935993	1	1	1	0.0655738	0.664934	0.161535
C18orf25	0.5404	0.757123	0.621514	1	1	1	0.187125	0.630548	0.127549
C18orf26	0.0658742	6.9576	0.166695	1	1	1	0.755698	0.0171931	0.611755
C18orf34	2.97862	6.69633	1.32509	1	1	1	0.343463	0.0335866	0.157537
C18orf45	0.0298341	0.0113333	0.187305	1	1	1	0.892443	0.90084	0.323871
C18orf51	1.78775	0.807787	0.0441309	0.0851356	1	1	0.000312967	0.339464	0.766493
C18orf54	1.99685	0.666681	2.34243	0.175449	1	1	0.00138455	0.389044	0.144742
C18orf55	2.81081	1.74919	0.0365358	0.324103	1	1	0.00345387	0.177129	0.814074
C18orf56	1.50724	0.0391336	0.24139	1	1	1	0.145542	0.834066	0.398241
C18orf62	3.54834	0.408204	0.0268587	0.442357	1	1	0.00508098	0.139144	0.696921
C18orf8	5.50033	0.00174094	0.430219	0.0424098	1	1	1.35687e-05	0.981208	0.590564
C19orf10	1.30303	0.0353012	0.0558639	1	1	1	0.679328	0.759296	0.986006
C19orf12	3.71542	3.07499	0.108253	1	0.459572	1	0.0155938	0.00100072	0.77449
C19orf15	0.938882	3.40312	0.0901704	1	1	1	0.0327869	0.0419832	0.403039
C19orf18	1.63152	0.134802	1.99772	1	1	1	0.904838	0.620552	0.265494
C19orf2	0.55784	6.33322	0.681978	1	1	1	0.597361	0.0139944	0.0935626
C19orf20	0.187454	0.243656	3.47336	1	1	1	0.467413	0.570572	0.241903
C19orf21	0.845359	0.311223	0.00208436	1	1	1	0.191523	0.57377	0.976409
C19orf22	0.358534	0.895365	0.301656	1	1	1	0.648541	0.209916	0.592963
C19orf25	1.56775	9.97257	0.958563	1	0.560226	1	0.757697	0.00159104	0.513395
C19orf28	0.794138	0.315068	0.239887	1	1	1	0.67413	0.522991	0.670532
C19orf29	2.31148	10.5653	0.0307369	1	1	1	0.209916	0.0235906	0.683727
C19orf33	0.0132385	0.317232	0.0722444	1	1	1	0.970812	0.546181	0.733706
C19orf36	0.483806	0.401534	0.307734	1	1	1	0.832467	0.755298	0.744902
C19orf40	0.0814834	0.746272	0.00095966	1	1	1	0.614154	0.226709	0.980008
C19orf42	2.97914	0.736682	0.499141	1	1	1	0.292283	0.434626	0.92483
C19orf44	1.66976	1.93102	0.21596	1	1	1	0.656937	0.35066	0.892843
C19orf45	0.031235	1.14201	0.706886	1	1	1	0.883647	0.385446	0.290284
C19orf46	1.6392	0.213908	0.181405	1	1	1	0.0995602	0.616553	0.644142
C19orf47	3.73032	0.237084	1.7388	1	1	1	0.109556	0.520592	0.386645
C19orf48	0.47842	7.77174	1.15256e-06	1	0.300378	1	0.42583	3.89915e-05	0.998001
C19orf53	0.0106747	0.966053	0.156503	1	1	1	0.880848	0.0903638	0.621751
C19orf54	1.58684	0.485392	1.63162	1	1	1	0.60016	0.235506	0.0855658
C19orf55	3.84015	0.457756	0.756676	1	1	1	0.0603759	0.154738	0.240704
C19orf57	2.47642	0.136573	0.00809642	1	1	1	0.160736	0.548181	0.811675
C19orf6	0.00102955	0.104377	1.49456	1	1	1	0.995602	0.695322	0.0107957
C19orf60	0.122291	0.874324	9.66827	1	1	1	0.359456	0.306677	0.000616819
C19orf61	1.45729	0.879404	0.422625	1	1	1	0.679328	0.202319	0.497801
C19orf62	1.56124	1.44233	0.00121901	1	1	1	0.0263894	0.346661	0.934826
C19orf66	0.0819819	1.20991	0.000735855	1	1	1	0.657337	0.185126	0.968013
C1D	1.56454	0.361832	0.217958	1	1	1	0.542983	0.598561	0.322271
C1GALT1	1.59213	0.00336739	0.000504963	1	1	1	0.017593	0.947221	0.97401
C1orf100	5.16967	1.84043	0.93313	0.077997	1	1	0.000252786	0.30108	0.388245
C1orf101	0.0503839	4.35608	4.56493e-05	1	1	1	0.729308	0.0579768	0.994002
C1orf102	0.261526	5.21563	0.00344755	1	0.497258	1	0.780888	0.00119212	0.945622
C1orf103	0.0350037	3.15886	0.638895	1	1	1	0.869252	0.0479808	0.183527
C1orf105	1.31345	2.99306	0.00136913	1	1	1	0.720912	0.0807677	0.962815
C1orf106	5.26835	3.64931	1.32741	0.0726052	0.535273	1	0.00019875	0.00147401	0.377449
C1orf107	3.47047	0.0258942	0.00574822	1	1	1	0.0147941	0.829668	0.878449
C1orf109	1.82026	0.489119	0.085778	0.859872	1	1	0.0103958	0.590964	0.854458
C1orf110	2.18558	0.0283004	0.56905	1	1	1	0.138345	0.823271	0.42383
C1orf111	0.158859	1.50547	0.0393647	1	1	1	0.880448	0.0559776	0.70092
C1orf112	0.0320285	1.18432	0.777738	1	1	1	0.892043	0.70092	0.188325
C1orf113	3.51919	0.0890087	0.346686	0.0589018	1	1	7.18336e-05	0.795682	0.153938
C1orf114	9.97422	4.24289	0.414104	0.060673	0.310748	1	8.53946e-05	0.000292776	0.106757
C1orf115	0.939493	0.86617	0.0261101	1	1	1	0.44902	0.418233	0.961216
C1orf116	1.12733	0.166216	0.0581129	1	1	1	0.306677	0.638545	0.678129
C1orf123	0.00666834	2.04508	0.8369	1	1	1	1	0.333067	0.00104727
C1orf124	1.74592	0.165349	0.444248	1	1	1	0.2487	0.759696	0.393043
C1orf125	1.65205	0.277451	0.235352	1	1	1	0.615354	0.558577	0.690124
C1orf129	0.00150544	0.524187	0.825574	1	1	1	0.930028	0.411835	0.291483
C1orf130	0.554574	2.76367	0.464301	1	1	1	0.851259	0.0603759	0.157537
C1orf131	0.01258	0.0041042	0.000990566	1	1	1	0.847261	0.934826	0.982007
C1orf135	0.521715	1.87214	1.35087	1	1	1	0.960816	0.196721	0.694122
C1orf14	0.493242	1.57461	0.0192003	1	1	1	0.177929	0.198321	0.87405
C1orf141	0.632038	0.00141274	1.4717	1	1	1	0.796881	0.977609	0.228708
C1orf144	1.08063	0.223212	0.0262033	1	1	1	0.345462	0.292683	0.821671
C1orf149	0.606261	1.54414	0.213368	1	1	1	0.986006	0.130748	0.672131
C1orf150	0.996757	1.47484	1.22247	1	1	1	0.988405	0.0715714	0.980408
C1orf151	0.978537	2.03987	0.369816	1	1	1	0.97601	0.0863654	0.737705
C1orf156	3.02525e-05	0.565693	2.32369	1	1	1	0.993203	0.682927	0.0335866
C1orf158	2.30962	3.83275	1.30997	1	1	1	0.45022	0.0419832	0.387045
C1orf159	0.00110904	0.0138621	0.0920719	1	1	1	0.986405	0.863654	0.911635
C1orf161	1.93562	1.88942	2.22011	1	1	1	0.306677	0.133147	0.0603759
C1orf162	2.29012	2.69104e-05	0.328219	1	1	1	0.520992	0.995202	0.85046
C1orf163	2.75298	0.0503387	0.0642409	0.097977	1	1	0.00044274	0.843662	0.631747
C1orf168	0.166527	0.424975	1.75711	1	1	1	0.456217	0.123151	0.012395
C1orf172	4.44512	0.117055	0.562959	0.112479	1	1	0.000614999	0.601359	0.0771691
C1orf173	1.79682	0.170114	0.00152571	0.245612	1	1	0.00233709	0.505798	0.914834
C1orf174	0.335645	6.08845	0.0021381	1	1	1	0.373051	0.0171931	0.913235
C1orf175	0.378743	1.01458	0.240995	1	1	1	0.977209	0.508197	0.441024
C1orf177	1.19937	4.89507	0.118417	1	1	1	0.210716	0.0447821	0.654538
C1orf182	1.53677	0.523527	0.126123	1	1	1	0.790084	0.243902	0.692923
C1orf183	1.92459	0.247574	1.20636	1	1	1	0.630148	0.594562	0.181127
C1orf187	1.16178	0.440266	1.01474	1	1	1	0.97481	0.352259	0.0455818
C1orf198	0.36991	2.37691	0.00764566	1	1	1	0.436225	0.0259896	0.904838
C1orf201	1.39447	1.01463	1.18782	1	1	1	0.588565	0.396241	0.0163934
C1orf21	3.12776	0.716749	0.677993	1	1	1	0.429828	0.0655738	0.427429
C1orf212	11.9945	0.829853	0.767453	0.0664049	1	1	0.000131017	0.594162	0.039984
C1orf213	0.952025	0.0795063	0.392022	1	1	1	0.297081	0.827269	0.12635
C1orf226	0.00879952	0.109599	0.0468836	1	1	1	0.977609	0.80088	0.834066
C1orf25	0.763007	0.0723664	7.24179e-05	1	1	1	0.132347	0.676529	0.988804
C1orf26	1.37128	0.686441	0.173632	1	1	1	0.970412	0.283886	0.379048
C1orf27	0.00216145	0.125493	0.43538	1	1	1	0.966413	0.865254	0.153938
C1orf31	0.548007	0.0451236	0.354355	1	1	1	0.634546	0.820072	0.5002
C1orf38	0.332701	0.848917	1.55747	1	1	1	0.754098	0.183127	0.0759696
C1orf43	1.86468	2.06775	0.00246928	1	1	1	0.201519	0.0635746	0.932827
C1orf49	1.41017	9.67327	0.213893	1	1	1	0.711715	0.0219912	0.651339
C1orf51	1.72346	0.37684	0.772337	1	1	1	0.353059	0.678129	0.704918
C1orf52	0.617034	0.27562	0.402663	1	1	1	0.156337	0.572971	0.386645
C1orf53	0.0370004	2.46311	0.0104915	1	1	1	0.742103	0.0231907	0.888445
C1orf54	0.0126901	3.02518	0.0806841	1	1	1	0.954418	0.0611755	0.854058
C1orf55	0.00644747	0.488246	0.0205946	1	1	1	0.996401	0.355458	0.965614
C1orf57	0.625777	5.04315	0.170347	1	1	1	0.707717	0.0243902	0.465814
C1orf61	1.66793	0.787215	0.168296	1	1	1	0.0387845	0.168732	0.401439
C1orf62	0.784554	1.66936	0.11507	1	1	1	0.939224	0.241903	0.964014
C1orf63	12.1287	0.0206693	0.00104705	0.058139	1	1	6.04516e-05	0.818473	0.985606
C1orf64	0.0893234	0.570234	0.88354	1	1	1	0.389844	0.336265	0.364654
C1orf65	2.33876	0.0580318	0.792694	1	1	1	0.155538	0.656937	0.587765
C1orf66	1.96053	2.35321	0.179911	0.286679	1	1	0.00289945	0.0355858	0.252699
C1orf71	0.045275	0.426523	0.00874504	1	1	1	0.564174	0.341863	0.87485
C1orf74	1.56077	0.316238	0.363927	1	1	1	0.0951619	0.389444	0.268293
C1orf77	0.027925	0.728976	0.00600054	1	1	1	0.779288	0.191923	0.911635
C1orf83	0.118805	0.508182	0.015481	1	1	1	0.703718	0.445022	0.897641
C1orf84	3.0825	0.305311	0.632835	1	1	1	0.037585	0.242703	0.267493
C1orf85	1.18994	0.0350124	0.573805	1	1	1	0.429028	0.720112	0.09996
C1orf87	0.820623	0.0668499	3.82587	1	1	1	0.0331867	0.85086	0.000699072
C1orf88	0.182702	0.325913	0.246862	1	1	1	0.501	0.555378	0.454618
C1orf9	0.00119352	0.00786968	0.468805	1	1	1	0.996002	0.943623	0.133147
C1orf91	3.00098	0.0744418	0.875761	1	1	1	0.142743	0.7493	0.447421
C1orf92	0.331501	0.905592	2.83226	1	1	1	0.644542	0.460216	0.0103958
C1orf94	2.43778	0.395553	0.783776	1	1	1	0.382247	0.347061	0.641343
C1orf95	0.0995174	0.188426	0.462605	1	1	1	0.848461	0.721311	0.734106
C1orf96	3.11689	2.20365	1.76641	1	1	1	0.213115	0.0663735	0.359456
C1QA	1.11486	0.673627	0.365115	1	1	1	0.0935626	0.459816	0.757297
C1QB	1.15308	0.508482	0.125565	1	1	1	0.137545	0.37505	0.556577
C1QC	0.0010085	1.44907	0.834749	1	1	1	0.954418	0.420632	0.0147941
C1QL1	0.0124935	0.202865	0.000230875	1	1	1	0.793682	0.491803	0.990004
C1QL3	1.20441	0.0189441	0.399479	1	1	1	0.380648	0.921631	0.413435
C1QTNF1	2.95226	1.27992	0.722393	1	1	1	0.0167933	0.186326	0.171531
C1QTNF2	0.620391	1.04425	0.000593273	1	1	1	0.39984	0.22431	0.966413
C1QTNF3	0.0168773	0.0203323	2.45282	1	1	1	0.868852	0.85006	0.0719712
C1QTNF5	0.176666	0.00545406	0.302499	1	1	1	0.904038	0.928029	0.0923631
C1QTNF6	0.14921	0.136039	0.0562054	1	1	1	0.528589	0.616154	0.822071
C1QTNF7	0.0958761	0.183802	0.169181	1	1	1	0.668133	0.593762	0.372251
C1QTNF9	0.704143	0.00340918	0.0570278	1	1	1	0.143942	0.95082	0.756497
C1R	0.605269	0.267676	2.16125	1	1	1	0.0763695	0.5002	0.00173782
C1RL	0.231227	1.15422	0.697104	1	1	1	0.5006	0.366254	0.162335
C1S	1.12756	0.964915	0.261531	1	1	1	0.848061	0.368652	0.787285
C2	1.34204	0.0413799	0.119672	1	1	1	0.0335866	0.772491	0.782487
C20orf103	0.890652	0.024657	0.0740163	1	1	1	0.996002	0.817673	0.991203
C20orf108	4.42313	0.345341	0.0063986	0.179144	1	1	0.00143479	0.526989	0.893243
C20orf11	2.05895	1.17578	0.249807	1	1	1	0.510196	0.269092	0.753299
C20orf111	0.320209	1.24778	0.13798	1	1	1	0.812475	0.0995602	0.391843
C20orf112	6.16363	2.15203	0.0140323	0.075344	1	1	0.000217737	0.067573	0.946421
C20orf114	0.0835417	0.00085291	0.103601	1	1	1	0.926429	0.967613	0.836066
C20orf117	4.40398	0.83849	1.67816	0.137408	1	1	0.000897193	0.545382	0.0631747
C20orf118	1.84335	1.78682	0.174744	1	1	1	0.113155	0.115154	0.7489
C20orf12	3.09806	0.024431	0.216323	0.160711	1	1	0.00118478	0.933626	0.318273
C20orf132	3.38017e-05	3.85095	0.0325402	1	0.41174	1	1	0.00071137	0.998001
C20orf151	0.107892	0.389376	1.05258	1	1	1	1	0.371052	0.287485
C20orf152	2.45133	0.391144	0.230923	1	1	1	0.622551	0.42383	0.185526
C20orf160	0.271102	2.4085	0.00493266	1	1	1	0.597761	0.0147941	0.914034
C20orf165	0.0428379	0.331979	0.744442	1	1	1	0.614154	0.779288	0.462615
C20orf166	0.0532799	5.03107	0.692632	1	0.885673	1	0.988005	0.0037201	0.0211915
C20orf177	4.34444	0.239985	1.76217	1	1	1	0.0558522	0.669332	0.255898
C20orf185	5.46135	3.63215	0.576465	0.072489	0.312036	1	0.000191701	0.000308509	0.0759696
C20orf186	8.94985	1.43382	0.556413	0.0539551	1	1	4.3438e-05	0.353059	0.161935
C20orf191	0.00762624	0.348277	0.0668825	1	1	1	0.9996	0.664934	0.52379
C20orf194	0.73207	0.575005	0.0675106	1	1	1	0.672131	0.531387	0.532587
C20orf196	0.491748	0.843816	0.323575	1	1	1	0.961216	0.145542	0.62535
C20orf197	3.68819	0.609044	0.0405464	1	1	1	0.131547	0.241104	0.835266
C20orf20	0.291938	5.77542	0.420737	1	1	1	0.747701	0.0159936	0.499
C20orf26	1.71797	0.0171342	0.127955	0.337879	1	1	0.00365448	0.962815	0.469012
C20orf27	0.987637	0.0722291	0.240358	1	1	1	0.777289	0.786086	0.92403
C20orf29	1.70636	1.83029	0.39964	1	1	1	0.714514	0.12555	0.826869
C20orf3	0.193429	0.233138	1.25293	1	1	1	0.629348	0.603758	0.192723
C20orf30	0.015687	0.022755	1.72314	1	1	1	0.738505	0.837665	0.214714
C20orf39	0.202985	0.0550986	0.715327	1	1	1	0.816873	0.771292	0.2507
C20orf4	3.36889	4.85105	1.06555	1	1	1	0.160736	0.0351859	0.763694
C20orf43	2.60901	5.00775	0.303347	0.132124	0.300662	1	0.000817977	0.000136739	0.528589
C20orf46	0.00436729	1.05899	0.0936396	1	1	1	0.986405	0.345462	0.602559
C20orf54	0.500041	0.322876	0.507838	1	1	1	0.673731	0.499	0.133147
C20orf7	0.124895	3.91361	0.0114633	1	1	1	0.628948	0.213115	0.85006
C20orf71	0.309241	0.020264	0.189419	1	1	1	0.114354	0.77569	0.616953
C20orf72	0.175564	0.0600186	0.000128457	1	1	1	0.669732	0.87445	0.990004
C20orf74	0.137707	8.20155	0.0464821	1	0.566341	1	0.932827	0.00168609	0.610956
C20orf85	0.959729	0.176011	0.149819	1	1	1	0.0243902	0.7509	0.484206
C20orf94	0.767675	0.178103	0.539323	1	1	1	0.127549	0.739704	0.135146
C20orf96	0.61475	0.0335852	0.0261284	1	1	1	0.97481	0.865654	0.690124
C21orf2	0.252303	1.54239	0.219979	1	1	1	0.459816	0.0187925	0.483806
C21orf29	0.0596473	1.41476	0.478499	1	1	1	0.992003	0.144342	0.0167933
C21orf33	1.24959	2.61858	0.461543	1	1	1	0.583766	0.0311875	0.0155938
C21orf45	3.95357	1.15667	0.0211152	0.114629	1	1	0.000631321	0.254698	0.766493
C21orf56	1.38442	2.66543	0.16981	1	1	1	0.762895	0.0719712	0.996002
C21orf57	0.0152781	0.0704098	0.0290961	1	1	1	0.822071	0.7505	0.788884
C21orf59	1.34408	3.03416	0.164177	1	1	1	0.12555	0.0415834	0.969212
C21orf62	0.178171	0.136023	1.12825	1	1	1	0.9996	0.469012	0.7493
C21orf63	0.00960997	0.0285076	0.468587	1	1	1	0.773291	0.87445	0.515794
C21orf66	0.37996	2.84466	0.00309123	1	1	1	0.503399	0.019992	0.926829
C21orf7	0.118188	0.0358379	0.097168	1	1	1	0.978808	0.768493	0.922431
C21orf70	1.75123	1.62206	0.326845	1	1	1	0.387445	0.243503	0.783686
C21orf91	0.567265	2.38597	0.0496825	1	1	1	0.967213	0.0803679	0.784886
C22orf13	1.1715	3.02562	0.276951	1	1	1	0.718513	0.110756	0.941223
C22orf15	0.19387	0.0779139	8.80175e-07	1	1	1	0.705318	0.670132	0.9988
C22orf24	0.129708	0.0199907	0.0114714	1	1	1	0.804878	0.809276	0.939224
C22orf25	0.609255	1.78327	1.33505e-05	1	1	1	0.0143942	0.0559776	0.994002
C22orf26	0.533055	3.63418e-06	0.915081	1	1	1	0.994802	0.994402	0.848461
C22orf28	0.438944	0.119561	0.166893	1	1	1	0.490604	0.718113	0.630148
C22orf29	1.88319	2.48366	0.995177	1	1	1	0.513794	0.129548	0.808876
C22orf30	0.265464	5.5599	0.0923333	1	1	1	0.685326	0.0495802	0.477409
C22orf31	0.52009	1.2354	0.652757	1	1	1	0.279488	0.141943	0.223511
C22orf33	0.0588964	0.631735	0.0183975	1	1	1	0.990404	0.539384	0.860856
C22orf39	0.365945	0.0731026	0.581658	1	1	1	0.226709	0.709716	0.326269
C22orf40	1.23059	4.93282	2.20225	1	1	1	0.646541	0.0767693	0.130348
C22orf41	1.21784	1.36873	0.0415248	0.468416	1	1	0.00542692	0.501	0.745302
C22orf9	0.0379132	0.00212865	0.675861	1	1	1	0.90044	0.97441	0.20072
C2CD2	0.0206674	0.00400254	0.0586786	1	1	1	0.987205	0.966014	0.702919
C2CD3	0.877083	0.227543	0.120633	1	1	1	0.395842	0.327469	0.442623
C2orf16	0.00224805	0.287307	0.025729	1	1	1	1	0.420632	0.952019
C2orf18	2.27868	1.23061	0.230302	0.0694555	1	1	0.000158459	0.203519	0.536585
C2orf21	0.602777	6.76614	0.0125158	1	1	1	0.783287	0.0571771	0.944022
C2orf24	1.23742	0.0110597	1.29735	1	1	1	0.127149	0.879648	0.119552
C2orf27	0.0249958	0.0629732	2.24693	1	1	1	0.935226	0.747701	0.0135946
C2orf28	0.00234115	0.0204705	2.74591	1	1	1	0.997201	0.860456	0.0151939
C2orf3	0.318576	0.0987344	0.188275	1	1	1	0.686925	0.644142	0.582167
C2orf30	0.698221	6.92837	0.142515	1	1	1	0.57377	0.0251899	0.505798
C2orf34	0.653743	0.219113	0.727342	1	1	1	0.469412	0.768093	0.0687725
C2orf37	1.08846	0.0170631	1.34202	1	1	1	0.640544	0.808077	0.236306
C2orf39	10.2495	0.840423	0.258873	0.144751	1	1	0.000981979	0.118752	0.395842
C2orf40	0.560848	6.62129	0.263865	1	1	1	0.303079	0.0307877	0.47421
C2orf42	0.722849	1.15564	0.146163	1	1	1	0.0255898	0.127149	0.548181
C2orf43	1.08461	0.0147072	0.0153004	1	1	1	0.846461	0.809676	0.877649
C2orf44	1.84923	0.167065	0.589288	1	1	1	0.0955618	0.687725	0.108357
C2orf47	0.995263	3.11021	1.21174	1	0.431529	1	0.165934	0.000875481	0.116753
C2orf48	0.38409	0.718107	0.474654	1	1	1	0.253099	0.433427	0.264294
C2orf50	2.03669	0.879869	2.05338	1	1	1	0.62375	0.423031	0.376649
C2orf51	0.0173463	0.425663	1.08787	1	1	1	0.737705	0.34866	0.101159
C2orf53	2.61764	14.1457	0.751471	1	1	1	0.460216	0.0354609	0.397441
C2orf54	0.38072	0.0985682	0.049632	1	1	1	0.931227	0.660536	0.914034
C2orf55	0.758134	3.98109	0.0476809	1	1	1	0.369452	0.0207917	0.628948
C2orf56	0.0193572	0.389358	0.0518531	1	1	1	0.998401	0.570172	0.970012
C2orf61	1.14573	2.89705	0.679006	1	1	1	0.560576	0.130348	0.310276
C2orf62	0.784058	0.0532567	0.984446	1	1	1	0.588165	0.782087	0.346661
C2orf63	0.115601	0.0188732	1.87998	1	1	1	0.904438	0.87365	0.0187925
C2orf64	0.208912	0.997728	1.76012	1	1	1	0.993203	0.22551	0.569772
C2orf65	9.14544	1.49023	0.194148	0.0827116	1	1	0.000292043	0.144342	0.137545
C2orf66	0.0164519	4.77455	0.256138	1	1	1	0.97441	0.0619752	0.532187
C2orf67	0.895107	3.94836	1.12327	1	1	1	0.867253	0.0647741	0.62455
C2orf69	0.495561	0.00491478	0.00359156	1	1	1	0.167933	0.886046	0.960816
C2orf70	0.000679504	1.20137	0.735492	1	1	1	0.994802	0.162335	0.109956
C2orf71	0.151012	1.20757	0.422544	1	1	1	0.858457	0.229108	0.371851
C2orf73	0.490812	0.0263272	3.36422	1	1	1	0.0655738	0.783287	0.0515794
C2orf76	0.000594804	0.0939237	0.164691	1	1	1	0.9988	0.60016	0.667333
C2orf77	1.7729	0.0202695	0.0116445	0.286679	1	1	0.00290517	0.90044	0.836865
C2orf80	0.959649	0.457988	0.153297	1	1	1	0.122351	0.57457	0.593363
C2orf83	0.161197	0.0185983	0.887805	1	1	1	0.629748	0.890444	0.148341
C2orf84	4.63338	1.98671	0.0274289	1	1	1	0.0435826	0.217513	0.94922
C3	2.66373	1.42733	0.438696	0.129893	1	1	0.000791508	0.393443	0.531787
C3AR1	1.85244	0.198718	0.254051	1	1	1	0.388645	0.72611	0.582967
C3orf1	0.706525	0.217592	0.404238	1	1	1	0.961615	0.618952	0.57497
C3orf10	0.448397	0.9942	1.27371	1	1	1	0.113155	0.321871	0.0147941
C3orf14	0.00234215	0.558769	0.0309378	1	1	1	0.993603	0.201519	0.965214
C3orf15	2.20252	0.117681	0.209679	1	1	1	0.44902	0.758896	0.92603
C3orf17	0.0248492	0.407708	0.819369	1	1	1	0.947221	0.35026	0.107157
C3orf19	0.00737532	1.16848	0.0416284	1	1	1	0.933227	0.303079	0.827669
C3orf20	0.343932	0.0186709	0.661022	1	1	1	0.855658	0.783686	0.345862
C3orf21	4.10884	0.00176357	0.121019	0.145505	1	1	0.000994474	0.962415	0.796881
C3orf22	1.83762	2.74826	0.00191431	1	1	1	0.12475	0.0303878	0.922031
C3orf23	0.368792	1.13972	0.0498784	1	1	1	0.514994	0.0879648	0.972411
C3orf24	0.286717	0.216927	0.191538	1	1	1	0.131947	0.567373	0.341463
C3orf25	2.08672	0.224893	0.00430734	1	1	1	0.0967613	0.497401	0.872451
C3orf26	1.11021	4.87023	0.3858	1	1	1	0.62495	0.097561	0.581367
C3orf27	0.438352	7.03246	0.162197	1	0.815257	1	0.830068	0.00329664	0.782487
C3orf30	0.0356405	0.347412	0.0608213	1	1	1	0.647341	0.414634	0.653339
C3orf31	1.65864	0.00216969	0.0841211	0.440833	1	1	0.00506055	0.958017	0.767293
C3orf32	0.618683	1.9734	0.0383268	1	1	1	0.984406	0.146741	0.598161
C3orf33	1.45278	0.665127	3.25161	0.286859	1	1	0.00292178	0.798481	0.0127949
C3orf34	10.9736	3.031	1.06882	0.0726052	1	1	0.000197692	0.0535786	0.42463
C3orf35	0.0215165	0.00614813	0.659116	1	1	1	0.963215	0.952819	0.7505
C3orf37	1.3959	0.432248	0.00304661	1	1	1	0.664934	0.502199	1
C3orf39	0.185215	0.133905	0.00633503	1	1	1	0.697321	0.576969	0.897241
C3orf44	0.233786	4.87272e-05	0.00264305	1	1	1	0.991203	0.993603	0.987205
C3orf45	7.96921	1.90726	1.05193	0.100351	1	1	0.000480782	0.0939624	0.0247901
C3orf50	0.00123258	1.649	0.347905	1	1	1	0.9996	0.0307877	0.508597
C3orf52	1.09967	6.17765	0.125977	1	1	1	0.792883	0.0155938	0.984006
C3orf55	0.9188	0.238709	0.045046	1	1	1	0.0131947	0.678529	0.705318
C3orf57	1.55995	0.985375	0.345447	0.362852	1	1	0.00400405	0.695322	0.656537
C3orf58	2.83004	4.62557	0.170346	1	1	1	0.461016	0.0679728	0.996801
C3orf59	0.124632	0.108608	0.264904	1	1	1	0.995202	0.566973	0.392643
C3orf63	3.12616	0.231249	2.55112	0.273817	1	1	0.00271449	0.238305	0.162335
C3orf64	0.189615	0.514022	0.523652	1	1	1	0.289484	0.653339	0.603359
C3orf67	0.00919051	6.98423	0.0307794	1	1	1	0.917633	0.0603759	0.727709
C3orf70	0.0548725	0.134356	0.00477934	1	1	1	0.792083	0.730508	0.902439
C3orf72	1.41012	0.26967	0.20548	1	1	1	0.77529	0.652939	0.732907
C3orf75	1.89736	0.863387	0.0113241	1	1	1	0.226709	0.344662	0.831667
C4BPA	3.96584	0.0335183	0.747645	1	1	1	0.291483	0.713315	0.94922
C4BPB	0.00375386	2.07692	1.20423	1	0.300662	1	1	0.00020726	0.607357
C4ORF12	1.50162	1.65546	1.12427	1	1	1	0.0639744	0.328668	0.0615754
C4orf14	0.201217	0.518575	3.70451	1	1	1	0.369452	0.665334	0.0419832
C4orf15	0.0383987	1.61704	0.0622892	1	1	1	0.808876	0.266293	0.656537
C4orf16	0.0056812	0.0104751	0.093443	1	1	1	0.945622	0.918033	0.7513
C4orf17	0.166573	0.155484	0.114185	1	1	1	0.585766	0.503399	0.383447
C4orf18	0.525369	1.92451	1.53631	1	1	1	0.992003	0.0759696	0.470612
C4orf19	0.113154	0.150855	0.275599	1	1	1	0.876849	0.780488	0.381847
C4orf21	0.340317	0.0796084	0.0150635	1	1	1	0.129548	0.723311	0.843662
C4orf22	1.13126	0.667882	0.488883	1	1	1	0.77609	0.328269	0.692923
C4orf23	2.82851	10.9574	0.626357	1	1	1	0.304278	0.0163934	0.412235
C4orf26	0.169643	0.354125	0.729808	1	1	1	0.519792	0.288285	0.22591
C4orf27	2.70214	0.162843	1.29476	1	1	1	0.734106	0.568972	0.779288
C4orf29	0.187482	2.81656	0.00450415	1	1	1	0.387045	0.0515794	0.890844
C4orf30	4.6666	0.675067	7.35002	0.00423837	1	0.710913	2.81239e-08	0.640944	9.07465e-06
C4orf31	0.784011	0.0549009	0.160703	1	1	1	0.880848	0.759296	0.927229
C4orf32	0.84407	1.94944	0.379407	1	1	1	0.0219912	0.0935626	0.231507
C4orf33	0.032877	1.2132	0.662155	1	1	1	0.952819	0.269492	0.105158
C4orf34	0.221693	1.40277	0.18766	1	1	1	0.658936	0.12475	0.316673
C4orf35	0.537121	0.616251	0.0228309	1	1	1	0.644542	0.387845	0.808077
C4orf36	4.0493	2.7041	0.13036	1	0.518521	1	0.0131947	0.00134261	0.488605
C4orf37	5.96262	0.0106744	0.000790834	0.0472783	1	1	2.32899e-05	0.837265	0.952419
C4orf39	0.316473	0.0646909	1.2972	1	1	1	0.815274	0.808077	0.00197359
C4orf40	0.0964243	2.16332	0.0454808	1	1	1	0.820872	0.0255898	0.636945
C4orf41	0.587269	0.237479	0.0638592	1	1	1	0.752499	0.507397	0.812075
C4orf43	0.198421	0.220452	1.70783	1	1	1	0.797281	0.576969	0.112355
C4orf44	0.0702814	0.0591436	0.152334	1	1	1	0.84966	0.806877	0.395442
C4orf45	0.014235	2.65296	0.000111848	1	1	1	0.9996	0.284286	0.968013
C4orf47	2.10746	0.0283815	1.06353	1	1	1	0.801279	0.781287	0.795682
C4orf49	0.000225671	0.459563	0.321175	1	1	1	1	0.478209	0.696122
C4orf6	7.87339	2.59797	1.95555	0.337879	1	1	0.00364741	0.089964	0.142343
C4orf8	0.843125	0.112733	0.053449	1	1	1	0.808477	0.782887	0.592963
C5	1.73307	0.72515	1.77177	1	1	1	0.551779	0.396241	0.34906
C5AR1	0.0273391	2.10094	0.322408	1	1	1	0.806877	0.163934	0.431028
C5orf13	1.28119	1.12777	0.0658842	1	1	1	0.210716	0.235106	0.705318
C5orf20	1.18989	0.0260661	0.00571983	1	1	1	0.814474	0.721311	0.863255
C5orf22	0.124158	3.08196	1.01314	1	1	1	0.95042	0.0115954	0.000954548
C5orf23	1.17352	0.452928	1.15632	1	1	1	0.131947	0.391843	0.111555
C5orf24	0.89906	1.18021	0.402627	1	1	1	0.285486	0.671731	0.97601
C5orf25	1.04825	3.17302	0.0327064	1	1	1	0.415834	0.189924	0.72451
C5orf28	2.47764	2.33933	0.0531061	0.115995	1	1	0.000645726	0.0259896	0.978009
C5orf30	0.132885	2.32303	0.713727	1	1	1	0.384646	0.0527789	0.120352
C5orf32	0.00683279	1.09767	0.364275	1	1	1	0.966014	0.435826	0.279488
C5orf33	5.00613	2.18461	0.226601	0.140823	1	1	0.00093257	0.439424	0.188325
C5orf34	5.79972	1.68024	0.549468	0.0619693	1	1	9.04182e-05	0.0503799	0.0495802
C5orf35	5.8853	0.465154	0.430214	1	1	1	0.121551	0.0379848	0.953619
C5orf36	0.501321	0.00274246	1.04571	1	1	1	0.789684	0.958417	0.145542
C5orf37	0.36122	1.40987	0.0718065	1	1	1	0.113555	0.222311	0.741703
C5orf4	0.0251992	2.7752	2.60668	1	1	1	0.632947	0.0355858	0.138744
C5orf40	0.0300158	2.31853	0.0349109	1	1	1	0.910436	0.0563775	0.689724
C5orf41	1.34063	0.0991443	0.00402138	1	1	1	0.057577	0.70052	0.941223
C5orf42	3.34863	0.237663	1.25685	1	1	1	0.201919	0.513794	0.22591
C5orf44	0.00423953	0.773948	1.34915	1	1	1	0.930028	0.491004	0.0459816
C5orf45	0.299067	0.327862	0.862229	1	1	1	0.762895	0.369852	0.511395
C5orf46	3.30437	2.17511	0.293345	1	1	1	0.115954	0.0851659	0.901239
C5orf48	1.85205	0.560171	0.277519	1	1	1	0.431028	0.528589	0.946821
C5orf49	1.49342	0.0761001	0.0423282	1	1	1	0.336265	0.728509	0.835666
C6	0.705122	1.1101	0.00430521	1	1	1	0.343862	0.219112	0.945622
C6orf10	1.49239	1.81625	6.64313e-05	1	1	1	0.452219	0.009996	0.992003
C6orf103	0.0202691	0.00307283	0.0219158	1	1	1	0.9992	0.922831	0.715714
C6orf105	2.9892	0.140607	0.292526	0.0751805	1	1	0.000214143	0.541383	0.240304
C6orf106	1.74896	5.86433	0.364251	1	1	1	0.760496	0.0387845	0.962415
C6orf114	1.54362	0.126569	0.178479	1	1	1	0.77569	0.52499	0.861655
C6orf115	0.00821924	0.273508	0.120199	1	1	1	0.971611	0.617753	0.717713
C6orf118	0.609261	2.52961	0.199874	1	1	1	0.789284	0.0891643	0.814474
C6orf125	0.122597	0.791547	0.617225	1	1	1	1	0.0219912	0.834866
C6orf126	0.907204	0.365864	1.38424	1	1	1	0.718513	0.44982	0.354658
C6orf127	0.0297875	0.819469	0.435126	1	1	1	0.804878	0.683327	0.371451
C6orf129	0.0850226	0.0125384	0.022412	1	1	1	0.978409	0.87565	0.822071
C6orf130	0.0328204	0.0751694	0.777853	1	1	1	0.720912	0.782087	0.057577
C6orf134	1.32547	0.261059	0.584991	1	1	1	0.447821	0.377449	0.159136
C6orf138	0.546523	5.03125	0.287267	1	1	1	0.932827	0.0239904	0.89964
C6orf142	0.855698	1.32521	0.00234817	1	1	1	0.453818	0.153539	0.915634
C6orf145	2.02344	0.500768	0.532301	1	1	1	0.0411835	0.133147	0.526189
C6orf146	0.0445282	4.15142	0.966211	1	1	1	0.772091	0.0563775	0.15074
C6orf15	0.043756	0.103383	0.237448	1	1	1	0.890844	0.72451	0.783686
C6orf150	0.00345568	4.57205	0.133287	1	1	1	0.896841	0.0359856	0.706517
C6orf154	3.59592	4.79517	1.10706	1	1	1	0.12435	0.0751699	0.861255
C6orf162	0.573813	0.0994416	0.0109656	1	1	1	0.858057	0.737305	0.871251
C6orf165	1.45269	1.61673	0.000434021	1	1	1	0.579768	0.257897	0.948421
C6orf167	1.30032	1.32133	0.0739961	0.318057	1	1	0.00336411	0.671731	0.57417
C6orf168	2.01654	0.139457	0.904023	0.204037	1	1	0.00176278	0.640544	0.0927629
C6orf170	0.0587595	0.520979	0.0698351	1	1	1	0.417833	0.429828	0.335066
C6orf174	9.00896	3.68323	0.0307608	0.0685036	1	1	0.000145579	0.0119952	0.660136
C6orf182	1.20262	0.0212435	0.536672	1	1	1	0.971212	0.808876	0.973211
C6orf186	2.15714	1.34311	0.168333	1	1	1	0.518193	0.207517	0.834866
C6orf190	1.1535	0.515784	0.835576	0.199939	1	1	0.00171146	0.651739	0.00392478
C6orf191	0.892809	2.71637e-05	0.103969	1	1	1	0.0447821	0.996401	0.632947
C6orf192	0.25854	0.0895229	0.000446699	1	1	1	0.828869	0.810076	0.993603
C6orf195	0.825034	0.511812	0.0825124	1	1	1	0.0551779	0.768093	0.705718
C6orf199	0.771322	2.34091	0.611681	1	1	1	0.762095	0.115954	0.736905
C6orf201	0.745289	0.723273	0.351333	1	1	1	0.507797	0.391443	0.559776
C6orf203	0.748373	5.25167	1.49843	1	1	1	0.027589	0.0635746	0.201519
C6orf204	1.24656	0.00581299	0.00233648	0.910033	1	1	0.0111955	0.90004	0.97601
C6orf211	0.0808302	0.768311	0.632289	1	1	1	0.485806	0.144742	0.209516
C6orf221	0.157291	0.894085	0.00386028	1	1	1	0.608157	0.219912	0.913634
C6orf222	0.865559	0.331335	0.000914304	1	1	1	0.155938	0.831667	0.953219
C6orf223	4.69681	2.64329	0.300643	0.295782	1	1	0.00305589	0.0045252	0.618553
C6orf225	1.89624	0.860742	1.61372	1	1	1	0.0755698	0.212715	0.371851
C6orf27	0.00216011	2.18957	0.248588	1	1	1	0.944822	0.318273	0.365054
C6orf47	1.57731	0.605793	0.0110402	1	1	1	0.732507	0.467413	0.997201
C6orf48	2.18676	2.47048	0.0346316	0.237055	1	1	0.00223994	0.04998	0.678529
C6orf57	0.727916	0.525126	1.2997	1	1	1	0.260296	0.437825	0.0627749
C6orf58	2.4462	1.07778	0.386284	0.0771699	1	1	0.000237681	0.215114	0.378648
C6orf62	4.61245	4.00097	0.00143493	0.0619693	1	1	9.21765e-05	0.019992	0.937225
C6orf64	0.00473897	0.0290889	0.259038	1	1	1	0.966014	0.781687	0.182727
C6orf66	0.0302679	1.44246	0.282561	1	1	1	0.961615	0.178728	0.745302
C6orf70	3.30694	0.381024	0.165665	1	1	1	0.0147941	0.340264	0.337065
C6orf72	3.54798	0.221969	0.664609	0.307971	1	1	0.00323496	0.69892	0.119952
C6orf81	1.01559	0.0749016	2.25881	1	1	1	0.990804	0.641743	0.459816
C6orf89	0.229024	0.468547	0.410469	1	1	1	0.938824	0.62415	0.454218
C6orf91	1.51427	0.288391	4.66879e-06	1	1	1	0.446621	0.435026	0.994002
C6orf97	0.00508133	3.4828	0.0454473	1	0.36708	1	0.945622	0.000555161	0.608956
C7	0.184325	0.956465	0.0674702	1	1	1	0.680528	0.306677	0.629348
C7orf10	0.845565	0.0997748	0.723013	1	1	1	0.973211	0.656937	0.586565
C7orf16	0.222912	1.28743	0.00582378	1	1	1	0.941223	0.140344	0.982407
C7orf20	0.889991	1.27793	0.357071	1	1	1	0.637745	0.463415	0.62535
C7orf23	0.00206087	0.553126	0.567437	1	1	1	0.978409	0.214314	0.193523
C7orf27	0.301744	4.98171	1.72598	1	1	1	0.760496	0.0231907	0.0203918
C7orf29	0.234624	0.0355472	0.120716	1	1	1	0.353059	0.827269	0.604958
C7orf30	1.73249	2.20978	0.868847	1	1	1	0.0531787	0.229108	0.540584
C7orf31	0.588523	0.61207	0.0481553	1	1	1	0.714114	0.335466	0.567773
C7orf33	0.847722	0.271194	0.220268	1	1	1	0.852459	0.506597	0.676129
C7orf36	0.491053	1.70343	0.00644312	1	1	1	0.870852	0.162335	0.952819
C7orf40	0.114396	0.147231	1.15508	1	1	1	0.809676	0.784486	0.182327
C7orf41	0.0603538	0.0938532	0.204323	1	1	1	0.939624	0.708117	0.934826
C7orf42	0.00217326	4.33218	0.482934	1	1	1	0.9988	0.118353	0.0571771
C7orf44	0.0247542	0.274386	0.525025	1	1	1	0.94922	0.604958	0.262695
C7orf45	0.179893	0.835526	0.263665	1	1	1	0.720112	0.490604	0.740504
C7orf46	0.586538	0.0158905	0.113175	1	1	1	0.394242	0.894442	0.456617
C7orf49	0.267017	0.0101382	0.0411724	1	1	1	0.246701	0.911235	0.748501
C7orf50	1.17932	3.39989	1.55713	1	1	1	0.216713	0.0135946	0.0803679
C7orf51	1.44001	0.0555721	0.00891529	1	1	1	0.510196	0.836465	0.95042
C7orf52	3.05565	0.316869	0.0346963	1	1	1	0.215914	0.385846	0.772891
C7orf53	2.94869	2.36815	0.0027594	0.0536163	1	1	3.84236e-05	0.115154	0.884046
[truncated: 12,807 more rows]
