# Supplementary material for: Signatures of Environmental Genetic Adaptation Pinpoint Pathogens as the Main Selective Pressure through Human Evolution
Source: PLoS Genet. 2011 Nov 3;7(11):e1002355. doi: 10.1371/journal.pgen.1002355 (PMC3207877; doi:10.1371/journal.pgen.1002355)
Supplement: Table S6 — Genes having at least one significantly associated SNP with Bayenv software (ranked Bayes factor >0.995) for one variable for each environmental class. (XLS) [file pgen.1002355.s010.xls]

## Sheet: Bayenv
Supplemental Table S6: Genes having at least one significantly associated SNP (ranked Bayes factor > 0.995) for one variable for each environmental class.
PATHOGENS	SUBSISTENCE	CLIMATE
A2BP1	A2BP1	A1CF
AADACL4	A2ML1	A2BP1
AATF	AAA1	A2ML1
ABCA12	AACS	A4GALT
ABCA13	AADACL1	AACS
ABCA4	AASS	ABCA1
ABCA7	AATK	ABCA13
ABCB10	ABAT	ABCA4
ABCB4	ABCA13	ABCA9
ABCC11	ABCA4	ABCB11
ABCC12	ABCB5	ABCB5
ABCC8	ABCC1	ABCC1
ABCG8	ABCC11	ABCC11
ABHD12	ABCC2	ABCC13
ABI3BP	ABCC4	ABCC3
ABL1	ABCC6	ABCC4
ABR	ABCD4	ABCF1
ABTB2	ABCG1	ABCG5
ACCN1	ABHD1	ABLIM1
ACMSD	ABHD12B	ABLIM3
ACO1	ABI3BP	ABR
ACO2	ABL2	ABTB2
ACOX3	ABLIM3	ACAA2
ACSF2	ABR	ACAD10
ACSM1	ABTB2	ACCN1
ACTL8	ACACB	ACCS
ACTN1	ACADL	ACMSD
ACTR10	ACBD5	ACO1
ACYP1	ACCN1	ACO2
ADAM10	ACCN5	ACOT11
ADAM12	ACCS	ACOX3
ADAM17	ACER2	ACPL2
ADAM18	ACLY	ACTN3
ADAM19	ACOT12	ACTR2
ADAM22	ACOX3	ACYP2
ADAM29	ACSF3	ADAM12
ADAM7	ACSL1	ADAM2
ADAMTS12	ACSL6	ADAM22
ADAMTS14	ACSM2B	ADAM23
ADAMTS17	ACSS2	ADAMTS12
ADAMTS20	ACYP2	ADAMTS14
ADAMTS3	ADAM10	ADAMTS16
ADAMTS6	ADAM12	ADAMTS17
ADAMTS9	ADAM2	ADAMTS18
ADAMTSL3	ADAM22	ADAMTS3
ADARB1	ADAM8	ADAMTS6
ADARB2	ADAMTS16	ADAMTS9
ADCY1	ADAMTS17	ADAMTSL1
ADCY10	ADAMTS18	ADAMTSL3
ADCY2	ADAMTS19	ADARB1
ADCY8	ADAMTS2	ADAT1
ADD2	ADAMTS20	ADCY1
ADH1A	ADAMTS9	ADCY10
ADH1B	ADAMTSL4	ADCY8
ADH1C	ADARB1	ADCY9
ADH4	ADAT1	ADD3
ADH6	ADCY1	ADK
ADORA1	ADCY5	ADORA1
ADORA3	ADCY8	ADRA1D
ADRA1A	ADCY9	ADRB2
ADRA1B	ADRA1A	ADSS
ADRBK2	ADRA1B	AFAP1
AFAP1	ADRA1D	AFF3
AFAP1L1	ADRB2	AGAP11
AFAP1L2	ADRBK2	AGBL1
AFF1	AES	AGBL4
AFF3	AFAP1	AGL
AFG3L2	AFAP1L1	AGT
AFM	AFF3	AGTPBP1
AGAP1	AFG3L1	AGTR1
AGBL1	AFM	AGXT2L2
AGBL4	AGAP1	AHCYL2
AGXT2L1	AGAP2	AHI1
AHRR	AGBL1	AHNAK
AJAP1	AGBL4	AIG1
AK7	AGPAT1	AJAP1
AKAP12	AGPAT2	AK3
AKAP2	AGPAT3	AK5
AKAP6	AGPAT4	AKAP12
ALCAM	AGPS	AKAP13
ALDH1L1	AGTPBP1	AKAP6
ALDH1L2	AIF1L	AKR1C3
ALDOB	AK3L1	AKR1C4
ALK	AKAP12	AKT3
ALOX12B	AKAP7	ALDH16A1
ALPK1	AKR1A1	ALDH1A1
ALS2CL	AKT3	ALDH1L1
ALS2CR12	ALAD	ALDH1L2
ALX4	ALCAM	ALK
AMACR	ALDH16A1	ALMS1
AMZ1	ALDH1A1	ALOX12B
ANGPT1	ALDH1L1	ALPK2
ANGPT2	ALDH9A1	ALPK3
ANGPT4	ALK	ALS2CL
ANGPTL5	ALPK1	ALX4
ANK1	ALPK2	AMACR
ANK2	AMACR	AMIGO2
ANK3	AMDHD1	AMPH
ANKFN1	ANGPT2	AMZ1
ANKMY2	ANGPT4	ANGEL2
ANKRD11	ANK3	ANGPT2
ANKRD46	ANKFN1	ANGPTL1
ANKRD50	ANKFY1	ANK2
ANKRD55	ANKH	ANK3
ANKS1B	ANKMY1	ANKFN1
ANO1	ANKMY2	ANKH
ANO10	ANKRD11	ANKMY1
ANO2	ANKRD12	ANKMY2
ANO3	ANKRD26	ANKRD11
ANTXR1	ANKRD27	ANKRD12
ANXA2	ANKRD33	ANKRD28
ANXA4	ANKS1A	ANKRD36B
AOAH	ANKS1B	ANKRD46
AOX1	ANO1	ANKRD50
AP1B1	ANO2	ANKRD55
AP1S3	ANO3	ANKS1B
AP3M1	ANO4	ANKS3
APBB2	ANO6	ANO2
APITD1	ANTXR1	ANO3
APOBEC3C	ANXA10	ANO4
APOBEC4	ANXA6	ANO6
APOL6	ANXA7	ANTXR1
APP	AOC3	ANXA6
ARAP1	AP2A1	ANXA7
ARGFX	AP2S1	AOF1
ARHGAP15	AP3B1	AOX1
ARHGAP22	APBA1	AP1S3
ARHGAP25	APBA2	AP2A2
ARHGAP26	APLF	AP3B1
ARHGAP9	APOA2	APBB2
ARHGEF11	APOL3	APITD1
ARHGEF3	ARFGAP2	APOC4
ARL6	ARHGAP15	APOH
ARL6IP6	ARHGAP20	APOL2
ARMC5	ARHGAP24	AQP8
ARMC7	ARHGAP26	AQP9
ARNT2	ARHGEF10	ARGFX
ARPC5	ARHGEF10L	ARHGAP12
ARSB	ARHGEF15	ARHGAP19
ARSG	ARHGEF17	ARHGAP22
ART4	ARHGEF3	ARHGAP24
ASAM	ARID1B	ARHGAP25
ASAP1	ARID3A	ARHGAP26
ASAP2	ARID3B	ARHGAP30
ASB3	ARID5B	ARHGDIB
ASPH	ARMC2	ARHGEF18
ASTN2	ARMC9	ARHGEF3
ASZ1	ARNTL	ARID1B
ATF6B	ARNTL2	ARMC4
ATF7IP	ARSG	ARMC9
ATP2B2	ARSK	ARNTL
ATP8A1	ART1	ARNTL2
ATP8A2	ARV1	ARPC2
ATP8B1	ARVCF	ARS2
ATXN1	ASB3	ARSG
ATXN10	ASH2L	ARVCF
ATXN7L1	ASPH	ASAM
AUTS2	ASTL	ASAP3
AVEN	ASTN2	ASB4
B3GNTL1	ATG16L1	ASCC2
B4GALNT3	ATG2B	ASCC3
B4GALT6	ATG5	ASPH
BACE2	ATG7	ASTN2
BACH2	ATMIN	ASXL3
BAI3	ATOH8	ATAD3A
BAIAP2L1	ATP10A	ATF2
BAT2D1	ATP1A2	ATF6
BAZ2B	ATP2A2	ATF7
BBS9	ATP2A3	ATF7IP
BBX	ATP2B2	ATG3
BCKDK	ATP2C2	ATIC
BCL11B	ATP4A	ATN1
BCL2	ATP5A1	ATP10B
BCL7C	ATP6V0A4	ATP10D
BDKRB2	ATP6V0D2	ATP11A
BDNFOS	ATP6V1B2	ATP2A1
BEST1	ATP8B4	ATP2B2
BICC1	ATP9B	ATP2B4
BICD1	ATRN	ATP2C2
BLM	ATXN1	ATP6V0A1
BMP7	ATXN10	ATP6V0A4
BMPR1B	ATXN2L	ATP6V1B2
BNC2	ATXN7L1	ATP8A1
BPI	ATXN8OS	ATP8A2
BRAF	AURKC	ATP9A
BRE	AUTS2	ATXN1
BRIP1	AVL9	ATXN2L
BRUNOL4	B3GALT1	AURKC
BRUNOL5	B3GALTL	AUTS2
BRWD1	B3GAT2	AXIN1
BST1	B3GNT5	B3GALTL
BTBD9	B4GALNT3	B3GAT2
BXDC1	BAALC	B4GALNT3
BZW2	BACH1	B4GALT4
C10orf107	BACH2	BAALC
C10orf11	BAK1	BACE2
C10orf114	BAZ1B	BACH2
C10orf129	BAZ2B	BAIAP2
C10orf18	BCAS1	BAK1
C10orf46	BCAS3	BANK1
C10orf58	BCAS4	BARX2
C10orf72	BCAT1	BAZ2B
C11orf10	BCKDHB	BBOX1
C11orf2	BCL2	BBX
C11orf70	BCL6	BCAS4
C11orf73	BCR	BCAT1
C11orf9	BEND3	BCL11A
C12orf5	BEST1	BCL2
C12orf63	BEST3	BCL2L11
C13orf16	BICC1	BCL2L14
C14orf145	BICD1	BCYRN1
C14orf149	BMP6	BDH2
C14orf166B	BMPR1A	BDNFOS
C14orf37	BNC2	BEND7
C14orf43	BPI	BEST3
C14orf83	BPIL2	BFSP2
C15orf2	BRE	BICD1
C15orf26	BRIP1	BIRC6
C16orf45	BRUNOL4	BLK
C16orf55	BRUNOL5	BMP5
C16orf63	BSPRY	BMP6
C16orf74	BTBD11	BMP7
C16orf89	BTBD8	BNC2
C17orf53	BTBD9	BPIL3
C17orf85	BTG4	BRAP
C18orf1	C10orf11	BRDT
C1orf101	C10orf46	BRE
C1orf114	C10orf47	BSPRY
C1orf129	C10orf54	BST1
C1orf175	C10orf59	BTBD11
C1orf198	C10orf71	BTBD9
C1orf63	C10orf72	BTN3A2
C1QTNF1	C11orf35	BYSL
C1QTNF2	C11orf40	C10orf11
C1S	C11orf49	C10orf114
C20orf185	C11orf53	C10orf119
C20orf196	C12orf11	C10orf141
C20orf26	C12orf26	C10orf27
C20orf39	C12orf29	C10orf28
C20orf74	C12orf4	C10orf46
C2CD2	C12orf41	C10orf54
C2orf21	C12orf51	C10orf59
C2orf28	C12orf63	C10orf72
C2orf30	C14orf101	C10orf79
C2orf34	C14orf118	C10orf81
C2orf42	C14orf145	C11orf40
C3	C14orf166B	C11orf41
C3orf32	C14orf21	C11orf49
C3orf33	C14orf37	C12orf30
C3orf50	C14orf43	C12orf41
C3orf59	C15orf2	C12orf63
C3orf63	C15orf23	C13orf1
C4orf34	C15orf39	C14orf105
C4orf37	C16orf53	C14orf143
C4orf45	C16orf57	C14orf145
C5orf25	C16orf61	C14orf166B
C5orf36	C16orf73	C14orf43
C6	C16orf74	C14orf45
C6orf103	C17orf39	C15orf41
C6orf114	C17orf49	C16orf35
C6orf145	C17orf66	C16orf38
C6orf146	C17orf68	C16orf5
C6orf165	C18orf1	C16orf62
C6orf186	C18orf34	C16orf63
C6orf195	C19orf47	C16orf71
C7orf42	C19orf53	C18orf1
C7orf53	C1GALT1	C18orf19
C7orf58	C1orf101	C18orf34
C8orf79	C1orf115	C18orf45
C8orf80	C1orf201	C19orf60
C9orf150	C1QTNF3	C1GALT1
C9orf7	C20orf12	C1orf100
C9orf89	C20orf152	C1orf125
C9orf91	C20orf196	C1orf77
C9orf98	C20orf26	C1orf95
CA10	C20orf54	C1QL3
CACHD1	C20orf7	C1QTNF1
CACNA1A	C20orf74	C1R
CACNA1C	C20orf94	C20orf12
CACNA1E	C20orf96	C20orf132
CACNA1G	C21orf7	C20orf185
CACNA1H	C22orf25	C20orf186
CACNA2D1	C22orf30	C20orf194
CACNA2D3	C2CD2	C20orf39
CACNA2D4	C2orf21	C20orf54
CACNB2	C2orf30	C20orf7
CACNB4	C2orf34	C20orf74
CACNG2	C2orf43	C20orf96
CADM1	C2orf53	C21orf7
CADM2	C2orf55	C22orf28
CADM4	C2orf67	C2CD3
CADPS	C2orf80	C2orf21
CADPS2	C3orf14	C2orf30
CALB2	C3orf50	C2orf34
CALCB	C3orf59	C2orf43
CALN1	C3orf63	C2orf48
CAMK1D	C4orf18	C2orf63
CAMK2A	C4orf19	C2orf76
CAMK2D	C4orf23	C3orf32
CAMK4	C4orf27	C3orf37
CAMTA1	C4orf39	C3orf50
CAMTA2	C5orf34	C4orf18
CAP2	C5orf36	C4orf19
CAPN3	C5orf41	C4orf22
CAPN7	C6orf105	C4orf30
CAPN9	C6orf126	C4orf45
CASC1	C6orf138	C5
CASC5	C6orf146	C5orf36
CASP10	C6orf167	C6orf138
CASP3	C6orf168	C6orf174
CASP5	C6orf174	C6orf190
CASP7	C6orf190	C6orf192
CASZ1	C6orf201	C6orf201
CATSPER4	C7	C6orf204
CBARA1	C7orf10	C6orf70
CBLN2	C7orf58	C8A
CBX2	C7orf60	C8orf34
CBX5	C7orf63	C9orf135
CC2D2A	C8orf79	C9orf3
CCDC105	C9orf102	C9orf41
CCDC109A	C9orf126	C9orf68
CCDC109B	C9orf139	C9orf91
CCDC112	C9orf150	CA10
CCDC127	C9orf156	CA8
CCDC129	C9orf3	CABLES2
CCDC140	C9orf30	CABYR
CCDC146	C9orf61	CACHD1
CCDC147	C9orf80	CACNA1A
CCDC148	C9orf91	CACNA1C
CCDC21	CA10	CACNA1D
CCDC25	CABC1	CACNA1E
CCDC3	CABLES1	CACNA1H
CCDC33	CABP1	CACNA1I
CCDC46	CABYR	CACNA1S
CCDC50	CACNA1A	CACNA2D1
CCDC54	CACNA1C	CACNA2D3
CCDC6	CACNA1E	CACNB2
CCDC60	CACNA1H	CACNB4
CCDC68	CACNA2D1	CACNG2
CCDC80	CACNA2D2	CACNG4
CCDC81	CACNA2D3	CACNG7
CCDC85A	CACNB2	CADM1
CCDC88C	CACNG3	CADM2
CCDC91	CADPS	CADPS
CCM2	CADPS2	CADPS2
CCND2	CALN1	CALB1
CCNJL	CALY	CALCOCO1
CCNT2	CAMK1D	CALD1
CCR4	CAMK2A	CALN1
CCR9	CAMK2B	CAMK1D
CD163	CAMK4	CAMK4
CD22	CAMKK1	CAMKV
CD226	CAMTA1	CAMTA1
CD44	CANT1	CANT1
CD48	CAPN10	CAPN11
CD82	CAPN3	CAPN9
CD8B	CAPN9	CARD16
CDC123	CAPRIN1	CASC1
CDC73	CAPSL	CASP4
CDH11	CAPZB	CASP8
CDH12	CARD11	CASR
CDH13	CARD8	CASZ1
CDH15	CASP10	CATSPER4
CDH18	CASP3	CBLB
CDH19	CASP4	CC2D2A
CDH23	CASR	CCBE1
CDH4	CBLB	CCDC102B
CDH8	CC2D2A	CCDC13
CDH9	CCBE1	CCDC134
CDK8	CCBP2	CCDC138
CDKAL1	CCDC102B	CCDC18
CDKL1	CCDC109B	CCDC27
CDKN2BAS	CCDC113	CCDC3
CDR2L	CCDC129	CCDC33
CDYL	CCDC13	CCDC37
CDYL2	CCDC148	CCDC38
CENPP	CCDC3	CCDC40
CENPV	CCDC33	CCDC46
CEP152	CCDC37	CCDC60
CEP57	CCDC40	CCDC64
CERK	CCDC46	CCDC67
CERKL	CCDC5	CCDC69
CFB	CCDC50	CCDC73
CFTR	CCDC57	CCDC77
CGN	CCDC67	CCDC80
CHAT	CCDC69	CCDC83
CHCHD5	CCDC83	CCDC85A
CHCHD6	CCDC85A	CCM2
CHGB	CCDC88C	CCNJL
CHIA	CCDC97	CCR9
CHMP1A	CCHCR1	CD109
CHMP4A	CCL28	CD163L1
CHMP4B	CCL5	CD22
CHN1	CCM2	CD274
CHRM2	CCNG1	CD44
CHRM3	CCNJL	CD80
CHRNA1	CCNYL1	CD82
CHRNA2	CCR3	CDAN1
CHRNA7	CCR6	CDC123
CHRNB3	CCR9	CDC2
CHST11	CD22	CDC42BPA
CHST8	CD226	CDC42SE2
CHST9	CD247	CDCP2
CHSY3	CD44	CDH11
CHUK	CD59	CDH12
CICE	CDC2L5	CDH13
CIR	CDC42BPA	CDH23
CLCA2	CDC42BPB	CDH4
CLCNKA	CDC5L	CDH8
CLEC1A	CDH10	CDH9
CLINT1	CDH13	CDKAL1
CLIP2	CDH2	CDKN2BAS
CLMN	CDH23	CDON
CLNS1A	CDH4	CDR2L
CLPB	CDH6	CDS2
CLSTN2	CDH8	CECR2
CLTCL1	CDH9	CENPP
CLUL1	CDKAL1	CEP110
CMIP	CDKN2BAS	CEP192
CMKLR1	CDS2	CEP350
CMTM8	CDYL	CERK
CMYA5	CECR2	CERKL
CNBD1	CELSR3	CFB
CNGB1	CENPN	CGNL1
CNGB3	CENPO	CHCHD3
CNIH3	CEP72	CHD2
CNKSR3	CERKL	CHD3
CNN1	CGNL1	CHD5
CNNM4	CHCHD3	CHL1
CNRIP1	CHD2	CHMP1A
CNTFR	CHD9	CHN2
CNTLN	CHERP	CHRDL2
CNTN3	CHKA	CHRM2
CNTN4	CHMP7	CHRM3
CNTN5	CHN1	CHRNA7
CNTNAP2	CHN2	CHST11
CNTNAP5	CHRNA7	CHST13
COBL	CHST5	CHST8
COG3	CHST8	CHST9
COL11A1	CHST9	CIRH1A
COL15A1	CHSY3	CLASP2
COL16A1	CHUK	CLCN3
COL1A2	CHURC1	CLDN10
COL22A1	CLASP2	CLEC16A
COL23A1	CLCA1	CLEC1A
COL24A1	CLCA2	CLNK
COL27A1	CLCN3	CLSTN1
COL29A1	CLCNKB	CLSTN2
COL3A1	CLDN10	CLYBL
COL4A4	CLEC16A	CMAH
COL5A1	CLEC3B	CMBL
COL6A3	CLEC7A	CMKLR1
COL6A6	CLGN	CMTM6
COLEC10	CLIC5	CMYA5
COLEC12	CLINT1	CNBD1
COMMD10	CLK3	CNGA3
COPS3	CLN8	CNGB1
CORO2B	CLNK	CNKSR3
CORO7	CLPB	CNTLN
CORT	CLPTM1L	CNTN2
CPD	CLSTN2	CNTN3
CPEB2	CLSTN3	CNTN4
CPEB4	CLUL1	CNTN5
CPNE4	CLYBL	CNTN6
CPNE7	CMIP	CNTNAP2
CPO	CMTM4	CNTNAP5
CRBN	CMTM6	COG2
CREB1	CMTM8	COG6
CREB3L2	CNBD1	COL12A1
CREB5	CNGA3	COL15A1
CREG2	CNGB1	COL19A1
CRIM1	CNOT2	COL21A1
CRLF1	CNP	COL23A1
CRMP1	CNTLN	COL24A1
CROP	CNTN1	COL25A1
CRY2	CNTN2	COL27A1
CRYL1	CNTN3	COL29A1
CRYM	CNTN4	COL4A1
CSDC2	CNTN5	COL4A2
CSF1R	CNTN6	COL4A3
CSK	CNTNAP2	COL4A3BP
CSMD1	CNTNAP4	COL4A4
CSMD2	CNTNAP5	COL5A1
CSN1S1	COBLL1	COL6A2
CSNK1A1	COCH	COL6A3
CSNK2A2	COG5	COL6A6
CSTF3	COL11A2	COLEC10
CTAGE5	COL12A1	COLEC12
CTBP2	COL13A1	COPS7A
CTCFL	COL14A1	CORIN
CTNNA1	COL15A1	CORO2B
CTNNA2	COL17A1	CORO7
CTNNA3	COL19A1	CORT
CTNNBIP1	COL21A1	COX10
CTNND2	COL22A1	CPA5
CTPS	COL23A1	CPEB1
CTTNBP2NL	COL27A1	CPEB4
CUL1	COL29A1	CPNE1
CUL2	COL4A1	CPNE4
CUL9	COL4A2	CPNE8
CUX2	COL4A3	CPT1A
CWF19L1	COL6A3	CPVL
CXCR7	COL6A6	CPXM2
CYLC2	COL8A1	CR1
CYP1A2	COLEC10	CRADD
CYP3A4	COLEC12	CRAMP1L
CYTSA	COMMD1	CRBN
CYYR1	COPG	CREB3L2
DAAM1	COPS7A	CREB5
DAB1	COTL1	CREBBP
DAB2IP	COX10	CRIP3
DACH1	COX4NB	CRISP3
DACT3	COX7B2	CRLF1
DAPK1	CPE	CRTC1
DAPP1	CPEB1	CRTC3
DCAKD	CPLX1	CRYL1
DCC	CPLX4	CSF1R
DCLK1	CPN1	CSGALNACT1
DDA1	CPNE1	CSMD1
DDAH1	CPNE3	CSMD2
DDR2	CPNE4	CSNK1G1
DDX10	CPS1	CSRP2
DDX21	CPT1A	CTBP2
DDX55	CPVL	CTNNA2
DDX58	CPXM2	CTNNA3
DEAF1	CRADD	CTNND2
2011-12-01	CRAMP1L	CTTNBP2
DEFB119	CREB3L2	CTTNBP2NL
DEFB125	CREB3L3	CUBN
DENND1A	CREB5	CUGBP2
DEPDC1	CRIM1	CUL4A
DEPDC5	CRLS1	CUX1
DEPDC6	CRNKL1	CUX2
DFFB	CRTC1	CXADR
DFNB31	CRYGC	CYB5A
DGKB	CRYL1	CYBRD1
DGKG	CS	CYFIP1
DGKH	CSF1R	CYFIP2
DGKI	CSGALNACT1	CYLC2
DGUOK	CSMD1	CYP19A1
DHDDS	CSMD2	CYP20A1
DHRS11	CSMD3	CYP27A1
DICER1	CSN1S1	CYP2U1
DIS3L2	CTBP2	CYR61
DISC1	CTNNA1	DAAM1
DKFZp586D211	CTNNA2	DAB1
DKFZp686A1627	CTNNA3	DAB2IP
DKFZp686C05222	CTNNBIP1	DAO
DKFZp686E10196	CTNND2	DAPK1
DLEU2	CTSL2	DAPK2
DLG2	CTTNBP2	DAPK3
DMC1	CUBN	DAPL1
DMP1	CUGBP1	DAPP1
DMRT1	CUGBP2	DAZAP1
DNA2	CUL1	DCC
DNAH1	CUL3	DCLK1
DNAH11	CUL4A	DDAH1
DNAH2	CUL9	DDB2
DNAH3	CUX1	DDC
DNAH7	CWF19L1	DDX49
DNAH8	CXCL12	DEAF1
DNAH9	CXCR5	DEFB125
DNAI2	CYBRD1	DEK
DNAJC11	CYFIP1	DENND5B
DNAJC27	CYP26B1	DEPDC6
DNAL1	CYP3A4	DFNA5
DNM3	CYP4F12	DGKB
DNMT3A	CYTIP	DGKG
DNMT3B	CYYR1	DGKH
DNMT3L	DAAM1	DGKI
DOCK1	DAB1	DHCR7
DOCK2	DAB2IP	DIAPH3
DOCK3	DACH1	DIO1
DOCK4	DAO	DIP2A
DOCK8	DAP	DIP2C
DOK6	DAPK1	DIS3L2
DOK7	DAPK2	DISC1
DOT1L	DAPP1	DKFZP564O0823
DPF3	DBC1	DKK3
DPP6	DBH	DLEU2
DPYD	DCC	DLG2
DPYS	DCTN2	DLGAP1
DRD2	DCUN1D4	DLGAP2
DRD3	DDX18	DLGAP4
DSCAM	DDX60L	DMPK
DSCAML1	2011-12-01	DMRT1
DSG3	DECR1	DMRT2
DTNB	DEFB125	DNAH11
DUSP27	DENND1A	DNAH2
DYDC1	DENND2A	DNAH3
DYM	DENND3	DNAH5
DYRK2	DEPDC6	DNAH7
DYSF	DERA	DNAH8
EAF1	DFNA5	DNAJC25
EBF2	DFNB31	DNAJC25-GNG10
ECM2	DFNB59	DNM3
EEF2K	DGKB	DNMT1
EEFSEC	DGKD	DNTT
EEPD1	DGKH	DOCK1
EFCAB7	DHCR7	DOCK10
EFHD1	DHRS11	DOCK2
EFNA3	DIAPH3	DOCK3
EFNA5	DIP2A	DOCK4
EGFR	DIP2B	DOCK5
EHD4	DIP2C	DOCK8
EHMT1	DISC1	DOCK9
EIF2AK2	DKFZP564O0823	DOK6
EIF2C2	DKFZp761F2014	DOPEY2
EIF4E3	DKK2	DPF3
EIF4ENIF1	DLC1	DPP10
ELA2B	DLEC1	DPP4
ELAVL2	DLG2	DPP6
ELFN2	DLGAP1	DPPA2
ELL	DLGAP2	DPY19L3
ELMO1	DLGAP4	DPYD
ELN	DMBX1	DPYSL2
ELOVL4	DMRT1	DSC1
ELP2	DMXL2	DSCAM
ELP4	DNAH11	DSCAML1
EML4	DNAH2	DSE
EML5	DNAH3	DST
EMX2OS	DNAH7	DTNA
ENAH	DNAH8	DTX4
ENOPH1	DNAH9	DUOX1
ENOX1	DNAI1	DUPD1
ENPP1	DNAJB12	DUSP10
ENPP2	DNAJC25-GNG10	DUSP27
ENPP3	DNAJC5	DYDC1
ENPP6	DNAJC5B	DYNC1I1
EP300	DNAJC6	DYSF
EPB41L2	DNAJC7	DYTN
EPB41L4A	DNAJC9	E2F2
EPCAM	DNER	E2F3
EPHA4	DNM2	EAF2
EPHA6	DNM3	EBF1
EPHB1	DNMT1	EBF2
EPHB2	DNPEP	ECD
EPHB4	DOCK1	ECH1
EPN2	DOCK10	EDAR
EPS8L2	DOCK2	EDN3
EPSTI1	DOCK3	EEF2K
ERBB4	DOCK4	EFCAB4A
ERC1	DOCK5	EFHB
ERC2	DOCK6	EFNA5
ERG	DOCK8	EFR3A
ERO1LB	DOK5	EFR3B
ESM1	DOK6	EFTUD1
ESR1	DOT1L	EGF
ESR2	DPCR1	EGFLAM
ESRRG	DPF3	EGFR
ESSPL	DPH5	EHBP1
ETS1	DPP10	EHD4
ETV1	DPP6	EHF
ETV3L	DPY19L4	EHHADH
ETV6	DPYD	EIF2AK4
EXOC2	DPYSL5	EIF2B3
EXOC4	DSC2	EIF2C2
EXT1	DSCAM	EIF3E
EYA4	DSCAML1	EIF3L
EZH2	DSE	EIF4E
F2	DST	EIF4E3
F2RL2	DSTYK	EIF4ENIF1
F5	DTD1	ELAVL1
FAAH	DTNA	ELAVL2
FADS2	DTNB	ELAVL4
FAF1	DUOX2	ELMO1
FAIM2	DYM	EML4
FAM101A	DYNC1I1	ENOX1
FAM105A	DYNC1LI1	ENPP3
FAM105B	DYSF	ENTPD7
FAM107B	DYTN	EPAS1
FAM110B	E2F3	EPB41L4A
FAM114A1	EBF1	EPB41L5
FAM129C	EBF2	EPC2
FAM131C	EBF3	EPDR1
FAM135B	ECD	EPHA2
FAM13A	EDEM1	EPHA3
FAM13C	EDEM2	EPHA4
FAM154A	EEA1	EPHA6
FAM155A	EEF2K	EPHA7
FAM162B	EFCAB2	EPHA8
FAM171B	EFCAB6	EPHB1
FAM178A	EFR3B	EPHB2
FAM19A1	EFTUD1	EPS8L2
FAM19A2	EFTUD2	ERBB4
FAM19A4	EGFL8	ERC1
FAM38B	EGFLAM	ERC2
FAM3B	EGFR	ERG
FAM49A	EHD2	ERRFI1
FAM59A	EHHADH	ESPL1
FAM69B	EID1	ESR1
FAM76B	EIF2AK4	ESRRG
FAM78B	EIF3L	ESSPL
FAM83D	EIF4E3	ETS1
FAM96A	EIF4ENIF1	ETV1
FANCA	ELAVL2	ETV6
FANCD2	ELAVL4	EVC
FARP1	ELMO1	EVC2
FARS2	ELOVL6	EWSR1
FAT1	ELOVL7	EXOC2
FBLN2	EMID2	EXT1
FBLN5	EML3	EXT2
FBLN7	EML4	EXTL3
FBN2	EMR2	EYA1
FBN3	ENHO	EYA2
FBXL11	ENOPH1	EYA4
FBXL19	ENOX1	EYS
FBXL7	ENPP2	F2R
FBXW8	ENPP6	F5
FCHSD2	EPB41L1	FAM107B
FER1L6	EPB41L2	FAM110B
FGD3	EPB41L4A	FAM114A1
FGD4	EPHA3	FAM117A
FGF12	EPHA4	FAM120A
FGF14	EPHA6	FAM125B
FGFR2	EPHA7	FAM135B
FGGY	EPHB1	FAM13A
FGL1	EPHB2	FAM13AOS
FHDC1	EPHB6	FAM149B1
FHIT	EPN2	FAM155A
FHOD3	EPS8	FAM160A1
FIGN	EPSTI1	FAM163A
FKTN	ERBB2IP	FAM171B
FLJ12993	ERBB4	FAM178B
FLJ20184	ERC1	FAM184A
FLJ20674	ERC2	FAM19A1
FLJ23834	ERG	FAM19A2
FLJ35220	ERICH1	FAM19A4
FLJ37543	ERN2	FAM19A5
FLJ40235	ERP27	FAM38B
FLJ41603	ERRFI1	FAM3C
FLJ43860	ESR1	FAM40A
FLJ46082	ESRRB	FAM49A
FLNB	ESRRG	FAM53B
FLT1	ETS1	FAM5B
FMN1	ETV1	FAM60A
FMN2	ETV6	FAM62B
FMNL2	EVC	FAM78B
FNDC1	EXOC2	FAM89A
FNDC3B	EXOC4	FAM8A1
FOXN2	EXOC6	FAM96A
FOXP1	EXOC6B	FARP2
FOXP2	EXT1	FARS2
FRAS1	EXTL3	FASLG
FREM2	F10	FAT4
FRMD4A	F13A1	FBLN2
FRMD4B	F2	FBLN5
FRMD6	F2RL1	FBN2
FRMPD2	FAF1	FBXL14
FRY	FAM105B	FBXL7
FRYL	FAM110B	FBXO10
FST	FAM114A1	FBXO11
FSTL1	FAM117B	FBXO2
FSTL4	FAM120A	FBXO31
FSTL5	FAM124A	FBXO4
FTO	FAM124B	FBXO40
FUT2	FAM125B	FBXO42
FUT8	FAM134B	FBXW10
FUT9	FAM135B	FBXW8
GABBR2	FAM13A	FCAR
GABRA4	FAM13C	FCHO2
GABRB1	FAM149B1	FCHSD2
GABRB3	FAM155A	FER
GABRG3	FAM164B	FER1L5
GABRP	FAM178B	FER1L6
GALNS	FAM179A	FERMT1
GALNT10	FAM179B	FEZ2
GALNT12	FAM184A	FFAR2
GALNT13	FAM19A1	FGD3
GALNT8	FAM19A2	FGF1
GALNTL1	FAM19A4	FGF12
GALNTL4	FAM19A5	FGF14
GALNTL5	FAM20B	FGF2
GAN	FAM38B	FGGY
GARNL1	FAM40A	FHDC1
GARNL3	FAM49A	FHIT
GBA3	FAM53B	FHL2
GCC2	FAM59A	FHOD3
GCG	FAM60A	FIBP
GCH1	FAM62B	FIG4
GCKR	FAM63B	FIP1L1
GCM2	FAM65B	FLJ10357
GFOD1	FAM71F2	FLJ11151
GFRA1	FAM73B	FLJ25770
GGNBP2	FAM82A1	FLJ35024
GIMAP7	FAM82B	FLJ37078
GINS1	FAM83A	FLJ37543
GLB1L2	FAM83D	FLJ41603
GLI1	FAM89A	FLJ43080
GLI3	FANCE	FLJ43860
GLIS1	FANCM	FLJ46082
GLIS3	FARP1	FLJ46361
GLO1	FARS2	FLVCR2
GLP2R	FASLG	FMN1
GLRA3	FAT4	FMN2
GLS	FBN3	FMNL2
GLUD1	FBXL11	FN3KRP
GLUL	FBXL2	FNBP4
GMDS	FBXL7	FNDC3B
GMPS	FBXO11	FNIP2
GNA12	FBXO21	FNTB
GNA15	FBXO4	FOXN2
GNAO1	FBXW2	FOXN3
GNAQ	FBXW7	FOXO3
GNB1L	FCHO1	FOXP1
GNE	FCHO2	FOXP2
GNG4	FCHSD2	FPR3
GNLY	FER	FRAS1
GOLT1A	FER1L6	FREM1
GOPC	FERMT1	FREM2
GOSR2	FFAR2	FRMD1
GPC5	FGD5	FRMD3
GPC6	FGD6	FRMD4A
GPD2	FGF1	FRMD5
GPM6A	FGFR2	FRMD6
GPR133	FGGY	FSIP1
GPR139	FHIT	FSTL4
GPR155	FHL2	FSTL5
GPR158	FHOD3	FTO
GPR177	FKBP14	FUBP3
GPR44	FLAD1	FUT9
GPR98	FLI1	FXYD3
GPRC5B	FLJ21511	FYCO1
GRAMD1B	FLJ21865	GABBR2
GRB10	FLJ22374	GABRA1
GRIA1	FLJ22662	GABRB1
GRIA4	FLJ35024	GABRB2
GRID1	FLJ37078	GABRG3
GRIK1	FLJ41603	GABRR1
GRIK2	FLJ43080	GABRR3
GRIK4	FLJ46082	GADL1
GRIK5	FLJ46481	GALNT10
GRIN2B	FLT3	GALNT12
GRIN3A	FMN1	GALNT13
GRIP1	FMNL1	GALNT2
GRK5	FNBP1	GALNTL2
GRM7	FNDC3B	GALNTL4
GRM8	FNTB	GAN
GSG1L	FOXI2	GARNL3
GSK3B	FOXN3	GARNL4
GSR	FOXP1	GAS2
GSTCD	FPR2	GAS7
GTF2IRD1	FRAS1	GATA4
GTF3C4	FREM1	GATA5
GTPBP1	FREM2	GATAD2A
GUCY1A2	FREQ	GBA3
GUCY2C	FRK	GBF1
GYPC	FRMD4A	GCG
HABP2	FRMD5	GCKR
HAL	FRMD6	GCLC
HAO1	FRMPD1	GCOM1
HDAC4	FRYL	GDA
HDAC7	FSHR	GDF10
HDAC9	FSIP1	GDPD1
HDC	FSTL4	GDPD5
HEATR1	FSTL5	GFRA2
HELB	FUS	GFRAL
HERC4	FUT9	GGTA1
HERPUD1	GABBR2	GIGYF1
HERPUD2	GABRA4	GIN1
HGS	GABRB1	GK5
HHAT	GABRB3	GLB1L2
HIP1	GABRG3	GLB1L3
HIVEP3	GABRR2	GLI2
HK1	GADD45B	GLI3
HK2	GALNT10	GLIS1
HKDC1	GALNT13	GLIS2
HLF	GALNT14	GLIS3
HMCN1	GALNTL4	GLP1R
HMGN3	GALNTL6	GLRB
HMP19	GANC	GLS
HNRNPD	GAP43	GLUD1
HNRPDL	GAS2	GLUL
HOMER1	GAS7	GMDS
HPN	GATA4	GMPS
HPSE2	GBA3	GNA12
HRASLS2	GBE1	GNA14
HRASLS5	GCAT	GNAI1
HRH1	GCG	GNAL
HRSP12	GCKR	GNAO1
HS3ST2	GDNF	GNAS
HS3ST4	GEMIN5	GNL3
HSD17B12	GFRA1	GNLY
HSD17B14	GFRA2	GOLGA5
HSD17B2	GFRAL	GOLGA7B
HSD17B4	GGA2	GOLM1
HSP90B1	GIGYF1	GOLPH3
HSP90B3P	GIGYF2	GOLSYN
HSPA12A	GJA9	GPA33
HSPA12B	GJC3	GPATCH8
HSPA1L	GK5	GPC5
HSPA8	GLB1L2	GPC6
HSPG2	GLDN	GPD1L
HTR3A	GLI1	GPLD1
HUNK	GLI2	GPR107
IAH1	GLIS1	GPR110
ICA1	GLIS3	GPR111
ICT1	GLRB	GPR116
IDO2	GLT1D1	GPR128
IFI27L1	GLUD1	GPR133
IFT172	GLUL	GPR155
IGDCC3	GMDS	GPR158
IGF2BP3	GML	GPR176
IGFBP7	GNAI1	GPR177
IGSF2	GNAO1	GPR19
IKBKAP	GNG12	GPR83
IKZF2	GPAM	GPR98
IKZF3	GPBP1L1	GRAP2
IL15RA	GPC5	GRB14
IL18RAP	GPC6	GRIA1
IL19	GPD2	GRIA4
IL1F10	GPM6A	GRID1
IL1RAP	GPR107	GRIK4
IL21R	GPR111	GRIN2B
IL27RA	GPR120	GRIP1
ILDR1	GPR128	GRK5
ILKAP	GPR133	GRM5
IMMP2L	GPR137B	GRM7
IMP5	GPR158	GRP
IMPA2	GPR176	GSG1
INADL	GPR39	GSG1L
INCENP	GPSM2	GSTZ1
INO80	GRB10	GTDC1
INSC	GRHL1	GTF2A1L
IPO8	GRHL2	GTF2E1
IQGAP2	GRIA1	GTF2E2
IQWD1	GRIA4	GTF3C4
IRAK4	GRID1	GUCY1A2
IRF8	GRID2	GUCY1A3
IRX1	GRIK1	GUCY2C
ISM2	GRIK2	GUCY2D
ISOC1	GRIK3	GULP1
ITCH	GRIK5	GYG1
ITFG1	GRIN2A	GZMK
ITGA11	GRIN2B	H2AFY2
ITGA7	GRIN3B	HAAO
ITGA9	GRK5	HABP2
ITGAD	GRK6	HADHB
ITGAM	GRM1	HAGH
ITGAX	GRM4	HAS1
ITGB5	GRM5	HCG26
ITGB6	GRM7	HCN1
ITGB8	GRM8	HCRTR2
ITK	GRXCR1	HDAC4
ITPR1	GSDMB	HDAC7
ITPRIPL1	GSG1	HDLBP
ITSN1	GSG1L	HEATR5B
IWS1	GSK3A	HEATR7A
JAGN1	GSTA4	HECTD1
JAK1	GTDC1	HECW1
JAK2	GTF2A1L	HEG1
JAKMIP1	GTF2H1	HERC2
JARID1B	GTPBP1	HERC4
JARID2	GUCY1B2	HERPUD2
JAZF1	GUCY2C	HES7
JDP2	GUCY2D	HEYL
JMJD2B	H6PD	HICE1
JMJD2C	HABP2	HIP1
KALRN	HADHB	HIPK2
KANK4	HAL	HIVEP1
KARS	HAO1	HIVEP2
KAT2B	HAS3	HK1
KATNAL1	HCCA2	HK2
KBTBD3	HCN1	HKDC1
KCNAB1	HCRTR2	HLA-DPB2
KCNB2	HDAC2	HLCS
KCNC3	HDAC4	HLF
KCND3	HDAC9	HMCN1
KCNE1	HDLBP	HMGCL
KCNG2	HEBP2	HMMR
KCNG3	HECW1	HN1L
KCNH5	HECW2	HNRNPD
KCNIP4	HEG1	HOXA11
KCNJ12	HELLS	HP1BP3
KCNJ6	HEMGN	HPCAL1
KCNK2	HHLA2	HPGD
KCNK3	HIATL1	HPSE2
KCNK9	HIF1A	HRNBP3
KCNMA1	HIP1	HRSP12
KCNMB2	HIPK2	HS1BP3
KCNMB3	HIVEP1	HS3ST1
KCNN3	HIVEP2	HS3ST2
KCNQ1	HK1	HS3ST3A1
KCNQ3	HLA-DOA	HS3ST4
KCNQ5	HLA-DPA1	HSD17B12
KCNT1	HLCS	HSD17B2
KCNT2	HLF	HSDL2
KCTD11	HMCN1	HSF2
KCTD13	HMGCLL1	HSF2BP
KHDRBS3	HN1L	HSF5
KIAA0101	HNF1A	HSPA12A
KIAA0284	HNRNPUL1	HSPG2
KIAA0391	HNRPLL	HTR5A
KIAA0427	HOXA11	HTR7P
KIAA0574	HPCAL1	HUNK
KIAA0686	HPN	HYDIN
KIAA0746	HPS5	HYOU1
KIAA0774	HRH1	IDH3B
KIAA0913	HRNBP3	IDO2
KIAA1009	HS1BP3	IFIH1
KIAA1217	HS3ST4	IFLTD1
KIAA1303	HS6ST3	IFNAR2
KIAA1305	HSD17B12	IFRD1
KIAA1377	HSD17B2	IFT122
KIAA1486	HSD17B3	IFT140
KIAA1549	HSD17B4	IGDCC3
KIAA1632	HSF2	IGF1
KIAA1680	HSPA4	IGF2BP1
KIAA1737	HSPH1	IGF2BP3
KIAA1853	HTATIP2	IGF2R
KIAA1919	HTR1E	IGFBP7
KIF13B	HTR4	IGFBPL1
KIF16B	HTRA1	IGHMBP2
KIF1A	HTRA3	IGSF2
KIF26B	HYDIN	IGSF21
KIF3C	IBSP	IGSF22
KIF6	ICK	IGSF5
KIFC1	ID4	IGSF6
KIFC3	IDO2	IKBKAP
KIRREL	IFI30	IKZF2
KIRREL3	IFIH1	IL10RB
KIT	IFRG15	IL12B
KLF5	IFT140	IL12RB1
KLHL1	IGDCC3	IL19
KLHL32	IGF1	IL1F10
KLHL7	IGF1R	IL1F8
KLHL8	IGF2	IL1F9
KRAS	IGF2BP1	IL21
KREMEN1	IGF2BP2	IL21R
KRT4	IGF2BP3	IL28RA
KRT71	IGF2R	IL2RA
KRT74	IGSF10	IL2RB
KRT82	IGSF21	ILDR1
KSR2	IGSF5	ILF2
KYNU	IGSF9B	IMMP2L
L3MBTL2	IKZF3	INADL
L3MBTL3	IL12A	INPP4B
L3MBTL4	IL12RB1	INPP5A
LACTB2	IL12RB2	INPP5D
LAD1	IL17REL	INSR
LAMA1	IL18BP	INTS2
LAMA2	IL1F8	INTS4
LAMA4	IL1F9	INTS7
LARGE	IL1R1	IPO8
LARP1	IL33	IQGAP2
LARS2	IL7R	IQGAP3
LASS6	ILVBL	IQSEC1
LBR	IMMP2L	IRF2BP2
LCE5A	IMPA2	ISX
LCLAT1	INADL	ITCH
LCORL	INHBC	ITGA1
LDB2	INPP5A	ITGA11
LDLRAD3	INPP5E	ITGA9
LEKR1	INSC	ITGAM
LEMD3	INSIG2	ITGAX
LEPR	INTS3	ITGB1
LGR4	INTS8	ITGB2
LGR5	IPO8	ITGB3
LHFP	IQCC	ITGBL1
LHFPL3	IQCD	ITIH5
LILRB4	IQGAP2	ITPK1
LIMCH1	IRAK2	ITPKB
LIMK1	IRF2	ITPR1
LIMS1	IRS2	ITPR2
LIN7A	ISX	ITPR3
LINGO2	ITFG1	ITSN1
LIPC	ITGA11	ITSN2
LIPG	ITGA8	JAK1
LMO1	ITGA9	JAZF1
LMTK2	ITGAE	JDP2
LMX1A	ITGB1	JMJD2C
LMX1B	ITGB3	JPH3
LOC100130017	ITGB5	KALRN
LOC116236	ITGB8	KANK1
LOC728819	ITIH2	KATNAL1
LOC92973	ITIH5	KCNAB1
LONP2	ITK	KCNB1
LONRF1	ITPK1	KCNB2
LONRF2	ITPR1	KCND2
LOXL1	ITPR2	KCNG3
LOXL2	ITSN1	KCNH5
LPAR1	ITSN2	KCNIP3
LPP	JAG1	KCNIP4
LRBA	JAZF1	KCNJ12
LRFN2	JMJD1C	KCNJ3
LRP1B	JMJD2C	KCNJ4
LRP2	JMY	KCNJ6
LRRC16A	JPH2	KCNK13
LRRC16B	JPH3	KCNK2
LRRC4C	KANK1	KCNMA1
LRRC59	KAT2B	KCNN3
LRRC7	KATNAL1	KCNQ1
LRRC8D	KCNA6	KCNQ3
LRRIQ3	KCNB1	KCNQ5
LRTM2	KCND2	KCNT1
LSAMP	KCND3	KCNT2
LSM1	KCNG3	KCNU1
LSP1	KCNH5	KCTD16
LSS	KCNH7	KCTD3
LTBP1	KCNH8	KCTD8
LTBP2	KCNIP1	KHDRBS2
LTBP4	KCNIP3	KIAA0101
LYAR	KCNIP4	KIAA0146
LYN	KCNJ1	KIAA0284
LYPD6B	KCNJ6	KIAA0323
LYZL2	KCNK10	KIAA0391
LZIC	KCNK13	KIAA0427
MACC1	KCNK2	KIAA0430
MACROD1	KCNMA1	KIAA0564
MACROD2	KCNMB2	KIAA0574
MAD1L1	KCNMB3	KIAA0686
MADD	KCNMB4	KIAA0748
MAGI1	KCNN3	KIAA0892
MAGI2	KCNQ1	KIAA0922
MAK10	KCNQ1OT1	KIAA1026
MAP2K6	KCNQ5	KIAA1045
MAP3K1	KCNU1	KIAA1128
MAP3K13	KCTD1	KIAA1147
MAP3K5	KCTD16	KIAA1199
MAP3K7IP1	KCTD5	KIAA1211
MAP4K5	KDSR	KIAA1217
MAP6	KHDRBS2	KIAA1267
MAPK10	KIAA0427	KIAA1303
MAPK8	KIAA0556	KIAA1377
MAPKAP1	KIAA0574	KIAA1429
MAPKAPK2	KIAA0586	KIAA1462
MAPKBP1	KIAA0748	KIAA1467
2011-03-01	KIAA0802	KIAA1486
2011-03-03	KIAA0947	KIAA1549
2011-03-07	KIAA1012	KIAA1618
MARCO	KIAA1026	KIAA1647
MARK3	KIAA1109	KIAA1680
MASP1	KIAA1128	KIAA1715
MAST4	KIAA1211	KIAA1853
MAT1A	KIAA1217	KIAA1958
MBNL1	KIAA1303	KIAA2026
MBNL2	KIAA1407	KIF13B
MBOAT2	KIAA1429	KIF16B
MCC	KIAA1467	KIF21A
MCHR1	KIAA1468	KIF26B
MCM3AP	KIAA1486	KIF5A
MCM8	KIAA1680	KIF5B
MCPH1	KIAA1683	KIF6
MCTP1	KIAA1715	KIFAP3
MCTP2	KIAA1755	KIRREL
MDGA1	KIAA1797	KIRREL3
MDGA2	KIAA1958	KIT
MDH1B	KIAA2026	KLF12
MDM4	KIDINS220	KLHL26
MDS1	KIF16B	KLHL32
MECR	KIF1B	KLHL7
MEGF10	KIF21B	KLK2
MEGF11	KIF23	KLK5
MEGF6	KIF26B	KLRAQ1
MEI1	KIF3A	KLRB1
MEIS1	KIF5A	KMO
MEOX2	KIF5B	KRAS
MERTK	KIF6	KRT73
METT10D	KIRREL	KRT76
METT5D1	KIRREL3	KSR2
MFHAS1	KIT	KTN1
MGAT3	KLF12	L3MBTL3
MGAT4A	KLF7	L3MBTL4
MGAT4C	KLHDC6	LACE1
MGAT5B	KLHL1	LAMA1
MGC13057	KLHL14	LAMA2
MGEA5	KLHL26	LANCL1
MGRN1	KLHL28	LAP3
MICB	KLHL31	LAPTM4B
MINK1	KLK14	LARGE
MITF	KLKBL4	LARP5
MKL1	KLRAQ1	LARS2
MLLT3	KLRK1	LASP1
MLXIP	KRAS	LCN10
MMP10	KRBA2	LCORL
MMP16	KRT4	LDB2
MMP20	KRT72	LDB3
MMP7	KRT78	LDLRAD3
MN1	KSR2	LEKR1
MOBKL2B	L3MBTL3	LEPR
2011-07-02	L3MBTL4	LEPROT
MORC1	LAIR1	LGALS4
MORN1	LAMA1	LGALS8
MORN5	LAMA2	LGI2
MPDU1	LAMA3	LGR4
MPHOSPH8	LAMC1	LGR5
MPP7	LAMC2	LHCGR
MPPE1	LAMP3	LHFP
MPZL1	LARGE	LHFPL2
MRC1	LARP6	LHFPL4
MRPL33	LARS	LHPP
MRPL48	LASP1	LIMCH1
MRRF	LASS3	LIMK1
MRVI1	LASS5	LIMS1
MS4A10	LBH	LIN28B
MSGN1	LCN10	LINGO2
MSH2	LCT	LIPC
MSH4	LDB2	LIPJ
MSI2	LDB3	LMBR1
MSRA	LDLRAD3	LMLN
MSRB3	LECT2	LMO1
MTA2	LEKR1	LMO3
MTAP	LEMD1	LMX1A
MTDH	LEPR	LNX1
MTFMT	LEPROT	LOC26010
MTHFD1L	LGI2	LOC283551
MTMR14	LGMN	LOC284417
MTMR2	LHCGR	LOC340357
MTMR6	LHFP	LOC441108
MTMR7	LHFPL3	LOC51057
MTMR9	LHFPL4	LOC553158
MTR	LHPP	LOC647121
MTUS1	LHX2	LOC728621
MUC17	LHX4	LOC729920
MUC4	LHX8	LONP2
MUCL1	LILRA1	LOXL2
MYBPC3	LIMCH1	LOXL4
MYBPH	LIMS2	LPAR1
MYH9	LINGO1	LPHN2
MYLK4	LINGO2	LPHN3
MYO15A	LIPA	LPP
MYO16	LIPC	LRBA
MYO1E	LIPG	LRCH1
MYO3A	LITAF	LRDD
MYO3B	LIX1	LRFN2
MYO5C	LMBR1	LRIG3
MYO6	LMCD1	LRP1B
MYO9B	LMNB1	LRP2
MYOCD	LMNB2	LRP8
MYOF	LMO3	LRRC16A
MYOM3	LMX1B	LRRC20
MYPN	LNX1	LRRC28
MYRIP	LOC100130017	LRRC3B
MYST1	LOC158381	LRRC4C
MYT1L	LOC26010	LRRC52
N4BP1	LOC441108	LRRC59
N4BP2	LOC441204	LRRK1
N4BP2L2	LOC51057	LRRTM3
NAALADL2	LOC729920	LSAMP
NACC1	LOH12CR1	LSG1
NAF1	LOXL2	LSM7
NALCN	LPAR1	LSS
NANS	LPHN3	LUZP1
NAP1L1	LPIN1	LVRN
NAP5	LPO	LY75
NAPEPLD	LPP	LYAR
NAPSB	LRBA	LYSMD1
NAV2	LRGUK	LYST
NAV3	LRIG3	LYZL2
NBAS	LRP11	M6PRBP1
NBEA	LRP1B	MACF1
NBPF22P	LRP8	MACROD2
NCALD	LRRC1	MAGI1
NCAM1	LRRC28	MAGI2
NCAPD2	LRRC4C	MAGI3
NCAPH	LRRC56	MAL
NCKAP1L	LRRC7	MALT1
NCOA1	LRRC8B	MAML2
NCOR1	LRRFIP2	MAN1A1
NCRNA00153	LRRK1	MAP2
NDC80	LRRN1	MAP3K4
NDST1	LSAMP	MAP3K7
NDST3	LSM14A	MAP3K7IP2
NDST4	LST-3TM12	MAP3K8
NEBL	LTBP1	MAP6
NEDD4L	LTBP4	MAPK10
NEK9	LUZP1	MAPK4
NELL1	LUZP2	MAPK8IP3
NELL2	LY6G5B	MAPKBP1
NF1	LY75	2011-03-01
NFASC	LY86	2011-03-04
NFATC1	LYPD5	2011-03-08
NFATC4	LYPD6B	MARK3
NFIA	LYZL2	MAST2
NFIB	MACF1	MAST3
NGEF	MACROD2	MAST4
NGF	MAGI1	MAT1A
NHLRC2	MAGI2	MATN2
NIT2	MAL	MAX
NKAIN2	MAMDC2	MBOAT1
NKAIN3	MAML2	MCC
NKD1	MAN1A1	MCCC1
NKTR	MAN1C1	MCF2L2
NLGN1	MANEA	MCHR1
NLP	MAP2	MCM3AP
NMB	MAP2K6	MCM5
NOL10	MAP3K13	MCPH1
NOL4	MAP3K14	MDGA1
NOL8	MAP3K5	MDGA2
NOS1	MAP3K7	MDH2
NOSTRIN	MAP4K1	MDN1
NOX3	MAP7	MDS1
NPAS2	MAP9	ME3
NPAS3	MAPK10	MED12L
NPR1	MAPK13	MED13L
NPTXR	MAPK4	MED27
NQO2	MAPRE1	MEF2B
NR3C2	2011-03-03	MEGF11
NR5A2	2011-03-04	MEIS1
NRG1	2011-03-06	MEOX2
NRG2	MARCO	MERTK
NRG3	MARK1	METT10D
NRIP1	MARK4	METTL5
NRP1	MAST2	METTL9
NRP2	MAST4	MFI2
NRXN1	MAX	MFSD4
NRXN3	MBD2	MGA
NT5C2	MBD3	MGAT4A
NT5C3	MBD5	MGAT4C
NT5M	MBNL2	MGAT5B
NTF3	MBTPS1	MGLL
NTM	MCCC2	MGRN1
NTN1	MCF2L2	MGST1
NTRK2	MCM3AP	MICAL3
NTRK3	MCM3APAS	MIPOL1
NUBPL	MCM5	MKL1
NUDCD1	MCPH1	MKL2
NUFIP1	MCTP1	MKNK1
NUPL2	MCTP2	MLLT10
NUS1	MDFI	MLLT3
NXF1	MDFIC	MMD
NXN	MDGA2	MME
NXPH1	MDM1	MMP1
OAF	MDS1	MMP15
OCA2	MED12L	MMP16
ODZ2	MED15	MMP7
ODZ4	MED26	MMP8
OGFR	MED27	MN1
OLA1	MEF2A	MOBKL2B
OLFM1	MEGF11	MOCOS
OLFM3	MEGF8	MON1A
ONECUT2	MEIS2	MPDZ
OPCML	MEMO1	MPND
OPRM1	METTL5	MPPED1
OR10AD1	MFAP5	MPPED2
OR2AE1	MFHAS1	MPRIP
OR2L13	MGAT4A	MPV17L
OR4D1	MGAT4C	MPZ
OR51G1	MGAT5	MPZL1
OR52D1	MGAT5B	MRC1
OR9Q1	MGC16385	MREG
OSBPL10	MGMT	MRPL13
OSBPL3	MGRN1	MRPL15
OSBPL6	MGST3	MRPS21
OSBPL9	MIB1	MRVI1
OSMR	MICAL2	MSI2
OSTN	MICALCL	MSLN
OXSR1	MIPEP	MSMB
P2RY6	MITF	MSRA
PACRG	MKL1	MTA3
PACSIN2	MKL2	MTCH1
PAG1	MKX	MTFR1
PAH	MLL3	MTHFD1
PAK7	MLL5	MTHFD1L
PALLD	MMD	MTHFR
PALM2	MMP16	MTMR3
PALM2-AKAP2	MMP24	MTNR1A
PAM	MNS1	MTSS1
PANK1	MORN1	MTUS1
PAPLN	MPP2	MTX2
PAPPA	MPP7	MUC16
PARD3B	MPPED1	MUC2
PARK2	MPRIP	MUC6
PARP11	MPZL1	MUDENG
PARP4	MRAP2	MUTED
PARVG	MRRF	MYBPC3
PASK	MSH4	MYCBP2
PAX2	MSH6	MYCBPAP
PAX3	MSI2	MYLK
PAX5	MSMB	MYO10
PAX7	MSRA	MYO16
PAX8	MSRB3	MYO1D
PBX3	MTA3	MYO3B
PCCA	MTFMT	MYO5C
PCDH15	MTHFD1L	MYO9B
PCDH17	MTMR3	MYOM1
PCDH9	MTR	MYOM3
PCLO	MTRR	MYST1
PCM1	MTSS1	MYST3
PCSK5	MUC15	MYT1L
PCSK6	MUPCDH	N4BP2L2
PCTK3	MURC	NAALADL2
PCTP	MUSK	NADK
PDE10A	MVP	NADSYN1
PDE1C	MXRA7	NAGPA
PDE2A	MYCBPAP	NANS
PDE4C	MYEF2	NAP5
PDE4D	MYH10	NARF
PDE6A	MYH11	NARG2
PDE7B	MYH14	NAT12
PDE8A	MYH2	NAT13
PDE8B	MYLK	NAT15
PDE9A	MYO10	NAV1
PDGFRA	MYO16	NAV2
PDGFRB	MYO1D	NAV3
PDGFRL	MYO1E	NBAS
PDIA2	MYO1H	NBEA
PDILT	MYO3B	NBPF22P
PDSS2	MYO5B	NCALD
PDZD2	MYO7A	NCAM2
PEBP4	MYO9B	NCAPG
PEMT	MYOM3	NCAPH
PER3	MYRIP	NCAPH2
PFTK1	MYT1L	NCF4
PGGT1B	NAALADL2	NCLN
PGM1	NACC2	NCOA7
PHACTR1	NADSYN1	NCOR2
PHF21A	NALCN	NCSTN
PHF21B	NAP5	NDST2
PHLDB2	NASP	NDST3
PHYH	NAT10	NDST4
PHYHIPL	NAV1	NDUFA12
PIAS4	NAV2	NDUFS5
PIBF1	NAV3	NEB
PID1	NBAS	NEDD4
PIGL	NBEA	NEGR1
PIGT	NCALD	NEIL3
PIK3C2G	NCAM1	NEK1
PIK3R4	NCAM2	NEK9
PIP3-E	NCKAP1L	NELL1
PIP4K2A	NCRNA00119	NELL2
PIP5K1B	NDRG4	NFAM1
PIP5K1C	NDST1	NFASC
PISD	NDST3	NFIA
PITPNC1	NDST4	NFIB
PITPNM2	NDUFAF2	NFIC
PKD1L1	NDUFB10	NGEF
PKD2	NDUFS5	NIN
PKHD1	NEBL	NIPA1
PKIB	NEDD4L	NIPSNAP1
PKP4	NEGR1	NKAIN2
PLA1A	NEK1	NKAIN3
PLA2G2C	NELL1	NKD1
PLA2G5	NELL2	NLGN1
PLA2R1	NEO1	NLN
PLAGL1	NF1	NLRP11
PLCB1	NFAM1	NLRP4
PLCB4	NFASC	NLRP5
PLCG2	NFAT5	NMNAT3
PLCH1	NFIB	NMT2
PLCXD2	NID2	NOL4
PLCXD3	NKAIN2	NOS1AP
PLCZ1	NKD1	NOSIP
PLEKHA5	NLGN1	NOV
PLEKHA6	NLK	NOX3
PLEKHG1	NLN	NPAS2
PLEKHH2	NLP	NPAS3
PLEKHM1	NLRC5	NPLOC4
PLEKHM3	NLRP5	NPR1
PLG	NMI	NR1H3
PLS1	NMNAT3	NR3C1
PLSCR1	NNT	NR3C2
PLTP	NOD1	NRAP
PLXDC2	NOL10	NRD1
PLXNA2	NOL4	NRG1
PLXNA4	NOS1AP	NRG2
PMEPA1	NOS2	NRG3
PMM1	NOV	NRG4
PMM2	NPAL2	NRXN1
PNPLA1	NPAS3	NRXN3
POLD3	NPDC1	NSMCE2
POLG2	NPLOC4	NSUN4
POLR1E	NPR1	NT5C3
POLR2G	NPSR1	NTM
PON1	NR1I2	NTN1
PON2	NR3C1	NTN4
POP1	NR3C2	NTNG1
POR	NRAP	NTRK3
POT1	NRBF2	NUDT6
POU2F3	NRCAM	NUP205
POU6F2	NRG1	NUP37
PPA2	NRG2	NUPL2
PPAP2B	NRG3	NXPH1
PPARG	NRSN2	NXPH2
PPCDC	NRXN1	OAS3
PPFIBP1	NRXN3	OASL
PPIC	NSMCE2	OBFC1
PPM1E	NT5DC1	OBSCN
PPME1	NT5M	OCA2
PPP2R2C	NTM	ODC1
PPP2R5C	NTN4	ODZ2
PPP3CA	NTRK3	ODZ3
PPPDE1	NUDT13	ODZ4
PRB2	NUDT3	OLFM2
PRDM16	NUP214	OLFM3
PRDM7	NUP37	OPALIN
PREP	NUP50	OPCML
PREX1	NXN	OPRK1
PRG-3	NXPH1	OPRM1
PRIC285	NXPH4	OPTN
PRKAG2	OBSCN	OR10AD1
PRKCA	OBSL1	OR13C8
PRKCE	OCA2	OR1L8
PRKCQ	ODZ2	OR1N2
PRKD1	ODZ3	OR4L1
PRKG1	ODZ4	OR51B6
PRO0611	OLFM2	OR51Q1
PROM1	OLFML2A	OR52D1
PROM2	OPALIN	OR52J3
PRPSAP2	OPCML	ORMDL3
PRR16	OPRK1	OSBPL1A
PRSS7	OPRM1	OSBPL3
PRTFDC1	OR4C11	OSBPL5
PRTG	OR4D6	OSBPL6
PSD3	OR4L1	OSMR
PSEN1	OR52N4	OTOP1
PSMC1	OR6Q1	OTUD3
PSMD14	OR7A5	OVCH1
PSME4	OR9Q1	OVCH2
PSTPIP1	ORC4L	OXSR1
PTER	OSBP2	P2RX6
PTGDR	OSBPL10	P2RY12
PTGER3	OSBPL6	P4HA2
PTGR1	OSMR	P4HA3
PTK2	OTUB2	PACRG
PTK2B	OTUD3	PACS1
PTK6	OVCH1	PAIP2B
PTPDC1	OVOL2	PAK6
PTPN12	P2RX5	PAK7
PTPN14	P2RY12	PALLD
PTPN2	P76	PALM2
PTPN3	PACRG	PALM2-AKAP2
PTPN5	PACS1	PAM
PTPRA	PAH	PANK1
PTPRC	PAICS	PANX1
PTPRD	PAIP2B	PAPSS2
PTPRE	PAK6	PAQR8
PTPRK	PAK7	PARD3
PTPRM	PALB2	PARD3B
PTPRN2	PALLD	PARK2
PTPRR	PALM2	PARL
PTPRT	PALM2-AKAP2	PARP4
PTTG1	PAP2D	PATZ1
PUM1	PAPLN	PAX3
PUS10	PAPPA	PBRM1
PVALB	PAPSS1	PBX1
PXDNL	PAQR5	PC
QRSL1	PARD3	PCCA
QSOX1	PARK2	PCDH15
R3HDM2	PARL	PCDH21
RAB22A	PARP4	PCDH7
RAB27A	PARP8	PCGF3
RAB27B	PARVA	PCLO
RAB2B	PARVB	PCM1
RAB30	PARVG	PCNP
RAB31	PATL1	PCNXL2
RAB38	PAX6	PCOLCE2
RAB3C	PBX1	PCSK5
RAB6B	PCCA	PCTK3
RABGEF1	PCDH15	PDCD4
RABL4	PCDHB3	PDCD5
RAD51L1	PCDHGA1	PDE1A
RAI1	PCDHGA10	PDE1C
RALA	PCDHGA11	PDE4B
RALYL	PCDHGA12	PDE4D
RANBP3L	PCDHGA2	PDE7A
RANBP9	PCDHGA3	PDE7B
RANGAP1	PCDHGA4	PDE8B
RAP1GDS1	PCDHGA5	PDE9A
RAPGEF3	PCDHGA6	PDGFC
RAPGEF4	PCDHGA7	PDGFD
RAPGEF5	PCDHGA8	PDGFRB
RAPH1	PCDHGA9	PDLIM5
RASGEF1B	PCDHGB1	PDSS2
RASGRF1	PCDHGB2	PDZD2
RASGRF2	PCDHGB3	PDZRN4
RASGRP3	PCDHGB4	PEBP4
RASGRP4	PCDHGB5	PECI
RASSF6	PCDHGB6	PELI2
RAVER2	PCDHGB7	PER2
RBKS	PCDHGC3	PEX5L
RBM28	PCDHGC4	PFKP
RBMS1	PCDHGC5	PFTK1
RBMS3	PCGF3	PGBD5
RBP2	PCID2	PGGT1B
RBPMS	PCM1	PGM1
RCBTB1	PCNT	PGM2
RCSD1	PCOLCE2	PGM2L1
RCVRN	PCSK6	PHACTR1
RDH10	PCTK2	PHACTR2
RDH16	PDCD5	PHC3
RECK	PDCD6IP	PHF11
REG4	PDE10A	PHF13
RELN	PDE1A	PHF2
RERE	PDE1C	PHF20
RFC4	PDE3A	PHF3
RFTN1	PDE4B	PHGDH
RFWD2	PDE4C	PHLDB2
RFWD3	PDE4D	PHYHIP
RFX6	PDE6B	PI4KA
RFX7	PDE6C	PIAS4
RGL1	PDE6D	PID1
RGNEF	PDE7B	PIGO
RGR	PDE8B	PIK3AP1
RGS1	PDE9A	PIK3C2G
RGS20	PDGFC	PIK3CD
RGS21	PDGFD	PIK3R3
RGS6	PDHX	PIK3R4
RGS7	PDIA2	PIK3R6
RHBG	PDIA5	PINK1
RHOBTB3	PDPN	PION
RICH2	PDSS2	PIP3-E
RIMBP2	PDZRN3	PIP5K1B
RIMS1	PEBP4	PIP5K1C
RIN2	PEG10	PIP5K3
RIN3	PEPD	PITPNB
RIPK1	PERP	PITPNC1
RIT2	PGGT1B	PITPNM2
RLBP1L1	PGLYRP4	PITPNM3
RNF144A	PGR	PIWIL2
RNF160	PHACTR1	PKD2L1
RNF165	PHACTR2	PKIB
RNF216	PHACTR3	PKM2
RNF220	PHB	PKN2
RNPEP	PHF2	PKNOX2
ROBO1	PHF20	PKP1
ROR1	PHF21B	PKP2
RORA	PHF3	PKP4
RPA3	PIBF1	PLA2G2C
RPAP3	PID1	PLA2G4E
RPE65	PIGB	PLA2G5
RPH3AL	PIGG	PLA2R1
RPS18	PIK3C2B	PLCB1
RPS6KA2	PIK3C2G	PLCB4
RREB1	PIK3R3	PLCE1
RSAD1	PIK3R6	PLCG1
RSF1	PILRB	PLCL2
RSPO2	PION	PLCXD2
RSPO3	PIP3-E	PLCXD3
RSU1	PIP4K2A	PLCZ1
RTBDN	PIP5K1B	PLD1
RTN4RL1	PIP5K1C	PLD5
RTTN	PIPSL	PLEKHA6
RUNX1	PITPNA	PLEKHA7
RUNX2	PITPNM3	PLEKHB1
RUVBL1	PIWIL2	PLEKHF2
RYR1	PIWIL4	PLEKHG5
RYR2	PKD1L2	PLEKHH1
RYR3	PKD2L1	PLEKHM3
SAA4	PKHD1L1	PLLP
SAMD12	PKIA	PLXDC2
SAMD3	PKIB	PLXNA2
SAMD4A	PKN1	PLXNA4
SASH1	PKN2	PNPLA1
SCD5	PKNOX1	PNPO
SCG2	PKNOX2	PODN
SCGN	PKP1	POLD3
SCHIP1	PKP4	POLK
SCLT1	PLA2G16	POLL
SCLY	PLA2G4F	POLR2G
SCN1A	PLB1	POLR3G
SCN9A	PLCB1	POM121C
SCNN1A	PLCB4	PON1
SCRIB	PLCE1	POU2F3
SCRN3	PLCG2	PPA2
SCTR	PLCL1	PPARA
SCUBE1	PLCXD2	PPARGC1B
SDK1	PLCXD3	PPHLN1
SEC16B	PLD2	PPM1H
SEC63	PLEKHA3	PPM2C
SEMA3A	PLEKHA5	PPME1
SEMA3E	PLEKHA7	PPP1R12A
SEMA5A	PLEKHA8	PPP1R12B
SEPHS1	PLEKHA9	PPP1R7
SEPT9	PLEKHB2	PPP1R9A
SERGEF	PLEKHF2	PPP2R2A
SERPINA1	PLEKHG1	PPP2R5C
SERPINA6	PLEKHG4B	PPP2R5E
SERPING1	PLEKHG5	PPP3CA
SERPINH1	PLEKHG7	PPP4C
SESN3	PLSCR2	PPP4R4
SETD1A	PLXDC1	PPP5C
SEZ6L	PLXDC2	PPPDE1
SFRP1	PLXNA2	PPPDE2
SFRP4	PLXNA4	PQLC1
SFTPD	PLXNC1	PRDM11
SFXN5	PMEPA1	PRDM12
SGCG	PMM1	PRDM16
SGCZ	PMP69	PREP
SGK196	PNLIPRP2	PREX1
SGOL1	PNLIPRP3	PREX2
SGPP2	PNPLA1	PRG2
SGSM1	PODN	PRG-3
SH2D1B	POLR3F	PRICKLE1
SH3BGRL2	POM121C	PRICKLE2
SH3BP5	PON2	PRIM2
SH3D19	POU2F2	PRKAG2
SH3PXD2A	POU6F2	PRKCA
SH3TC2	PPARA	PRKCB
SHANK1	PPARGC1B	PRKCE
SHC4	PPFIA2	PRKCH
SHMT1	PPFIA3	PRKCI
SHPK	PPFIBP1	PRKDC
SIDT1	PPM1B	PRKG1
SIGLEC1	PPM1E	PRKRIP1
SIGLEC5	PPM1H	PROM1
SIM1	PPP1R7	PRPF4B
SIPA1	PPP2R2A	PRR14
SIPA1L1	PPP2R2B	PRR16
SIPA1L2	PPP3CA	PRR5
SIPA1L3	PPP3CB	PRRX1
SIRPB2	PPP4R1	PRSS8
SIRT3	PPP4R4	PRTFDC1
SIRT5	PQLC1	PRTG
SLC10A2	PRDM12	PSD
SLC10A7	PRDM16	PSD3
SLC12A8	PRDM2	PSKH2
SLC14A1	PRDX1	PSMB1
SLC14A2	PREPL	PSMD14
SLC15A2	PREX1	PSME4
SLC16A5	PRG2	PSTPIP1
SLC16A7	PRG-3	PSTPIP2
SLC16A9	PRIC285	PTCHD3
SLC17A6	PRKACB	PTDSS2
SLC1A1	PRKCA	PTEN
SLC1A2	PRKCE	PTEN2
SLC1A4	PRKCH	PTER
SLC24A2	PRKCI	PTK2B
SLC24A3	PRKCQ	PTPN21
SLC25A21	PRKG1	PTPN22
SLC25A29	PRMT8	PTPN3
SLC25A33	PRNP	PTPN9
SLC26A11	PROK1	PTPRC
SLC26A5	PROM1	PTPRD
SLC27A1	PRPF18	PTPRG
SLC28A1	PRPF4	PTPRH
SLC2A12	PRPF40B	PTPRK
SLC2A9	PRPF8	PTPRM
SLC35C1	PRR14	PTPRR
SLC35F1	PRR16	PTPRS
SLC35F3	PRR4	PTPRT
SLC35F4	PRRX1	PVRL4
SLC37A1	PRRX2	PVT1
SLC39A1	PRSS12	PWP2
SLC39A11	PRSS23	PWWP2B
SLC39A12	PRTG	PXDN
SLC3A2	PSCA	PXDNL
SLC44A5	PSD3	PXN
SLC45A2	PSEN1	PYY
SLC4A10	PSMD13	QRICH2
SLC4A4	PSMD14	QSOX1
SLC5A12	PSME4	RAB11FIP2
SLC5A4	PSORS1C1	RAB14
SLC5A6	PSORS1C2	RAB20
SLC6A11	PSTPIP2	RAB27B
SLC6A5	PTGFRN	RAB2A
SLC7A1	PTK2B	RAB31
SLC7A5	PTK6	RAB3C
SLC9A11	PTPLB	RAB40B
SLC9A9	PTPN1	RABGEF1
SLCO1B1	PTPN3	RAD23B
SLCO2B1	PTPN5	RAD51L1
SLCO3A1	PTPN7	RAD54B
SLFN11	PTPN9	RAI14
SLIT3	PTPRB	RALGPS2
SMG1	PTPRD	RALYL
SMG6	PTPRG	RANBP17
SMOC2	PTPRJ	RANBP9
SMURF2	PTPRK	RAP1GDS1
SMYD2	PTPRM	RAPGEF3
SMYD3	PTPRN2	RAPGEF5
SMYD4	PTPRO	RARB
SNAP91	PTPRR	RASA3
SNAPC4	PTPRS	RASGRF1
SND1	PTPRT	RASGRF2
SNORD113-7	PTPRZ1	RASSF1
SNRNP200	PVRIG	RASSF5
SNTG1	PVRL1	RASSF9
SNX1	PVRL4	RAVER2
SNX19	PVT1	RBBP4
SNX25	PXDN	RBBP8
SNX29	PXMP3	RBM11
SOBP	PXMP4	RBM19
SOCS2	PXT1	RBM33
SOCS4	PYGL	RBM35A
SORBS1	QTRTD1	RBM47
SORBS2	R3HDM2	RBM6
SORCS1	RAB10	RBMS3
SORCS2	RAB11FIP3	RBPMS
SORCS3	RAB31	RBPMS2
SORL1	RAB3B	RCAN1
SOS1	RAB3GAP1	RCBTB1
SOX5	RAB40B	RCBTB2
SP100	RAB8A	RCL1
SP3	RABGGTB	RCSD1
SPAG16	RAD18	RCVRN
SPATA13	RAD51L1	RDH12
SPATA18	RAD54L	RECQL
SPATA7	RAI14	REEP1
SPC25	RALYL	RELN
SPEN	RANBP17	RERE
SPINK5	RANBP9	RERG
SPIRE1	RAP1GAP	RET
SPOCK3	RAPGEF3	RFC3
SPRED2	RAPGEF4	RFTN1
SPSB1	RARB	RFWD2
SPTB	RASAL1	RFWD3
SPTBN1	RASGRF2	RFX3
SPTBN5	RASGRP3	RFX4
SPTLC2	RASSF9	RGMB
SPTLC3	RB1CC1	RGNEF
SPTY2D1	RBBP4	RGS17
SQRDL	RBBP9	RGS20
SRD5A1	RBM12	RGS5
SRD5A3	RBM15B	RGS6
SREBF1	RBM19	RGS7
SREBF2	RBM26	RHBDD1
SRGAP1	RBM27	RHOJ
SRL	RBM33	RHPN2
SSBP2	RBM47	RICH2
SSBP3	RBM9	RIMKLA
ST14	RBMS3	RIMS1
ST18	RBPMS	RIMS2
ST3GAL1	RCSD1	RIN2
ST6GAL2	RECK	RIPK4
ST6GALNAC3	REEP3	RIT2
ST8SIA1	RELL1	RLBP1L1
ST8SIA2	RELN	RNF126
STAB2	RERG	RNF144B
STAC	RFC1	RNF150
STARD13	RFC3	RNF175
STARD5	RFC5	RNF185
STAU2	RFFL	RNF213
STIM2	RFTN1	RNF214
STK10	RFX3	RNF220
STK32A	RFX4	RNF24
STK32B	RGL1	RNFT2
STK32C	RGMA	RNGTT
STOM	RGMB	RNPEP
STOML3	RGNEF	ROBO1
STOX1	RGS17	ROBO2
STX4	RGS3	ROCK1
STX8	RGS6	ROR1
SUCLG1	RGS7	RORA
SULF1	RGS8	RORB
SV2C	RHBG	RP1
SVOP	RHOBTB1	RPA1
SYK	RHOJ	RPA3
SYN3	RHPN2	RPAIN
SYNE1	RIMBP2	RPAP3
SYNE2	RIMKLB	RPGRIP1L
SYNPO2	RIMS1	RPL13A_6_816
SYT1	RIPK1	RPLP0P2
SYT10	RLBP1L1	RPN2
SYT6	RNASEH2B	RPRD2
SYT7	RNASEK	RPS9
SYT9	RNF115	RPTN
TACC2	RNF144A	RREB1
TACR1	RNF165	RRM1
TADA1L	ROBO1	RSBN1
TAL1	ROBO2	RSPO2
TANC1	ROR2	RSPO4
TAOK1	RORA	RSRC1
TARBP1	RPAP3	RSU1
TAS1R2	RPGRIP1L	RTEL1
TBC1D1	RPH3A	RTN4
TBC1D2	RPH3AL	RXRG
TBC1D22A	RPL13A_6_816	RYR1
TBC1D8	RPLP0P2	RYR2
TBCD	RPLP2	RYR3
TBPL2	RPP40	S100Z
TBX15	RPS6KA2	SAG
TBX6	RRM1	SAMD12
TCF12	RSF1	SAMD3
TCF4	RSHL1	SAMSN1
TCF7L2	RSU1	SAP30BP
TEAD1	RTEL1	SAP30L
TEAD4	RTN1	SAPS2
TECTA	RUFY3	SASH1
TERF2IP	RUNX1	SATB1
TESC	RUNX1T1	SATB2
TET1	RUNX3	SBF2
TEX14	RUSC2	SBNO1
TEX15	RXRA	SCAPER
TGFA	RYR1	SCARNA16
TGFB1I1	RYR2	SCCPDH
TGFBR3	RYR3	SCD
THADA	S100A1L	SCD5
THOC1	S100Z	SCFD2
THRB	SAA2	SCGN
THSD4	SALL2	SCHIP1
THSD7A	SAMD4A	SCIN
TIA1	SAMSN1	SCN10A
TIAM1	SAP130	SCN4B
TIMM44	SAPS1	SCN5A
TJP1	SAPS2	SCN8A
TLE1	SATB2	SCO2
TLR10	SBF1	SCP2
TM4SF20	SBNO2	SCTR
TM9SF2	SCAPER	SCUBE1
TMBIM4	SCARA5	SCUBE2
TMC1	SCARB1	SDC3
TMC2	SCARF1	SDK1
TMC3	SCD5	SEC1
TMCC3	SCFD1	SEC14L3
TMED10	SCFD2	SEC14L5
TMEM117	SCGN	SEC23A
TMEM119	SCHIP1	SEC23IP
TMEM123	SCIN	SEC62
TMEM131	SCML4	SECTM1
TMEM132B	SCN3A	SEH1L
TMEM132D	SCN5A	SEL1L
TMEM143	SCP2	SELP
TMEM163	SCPEP1	SEMA3E
TMEM195	SCRN1	SEMA5A
TMEM207	SCRN3	SEMA6D
TMEM44	SCUBE1	SEMA7A
TMEM55B	SDC1	SEPT2
TMEM56	SDC2	SEPT9
TMEM70	SDCCAG8	SERINC1
TMEM71	SDF4	SERINC5
TMEM87A	SDK1	SERPINA12
TMEM87B	SEC14L5	SERPINA4
TMPRSS11B	SEC16A	SERPINA6
TMPRSS11D	SEC24D	SERPINB2
TMPRSS7	SEC31B	SERPINI1
TMTC1	SELP	SESN3
TMX4	SEMA3A	SETBP1
TNFAIP8	SEMA3C	SETD1A
TNFRSF10A	SEMA3D	SEZ6L
TNFRSF10C	SEMA5A	SEZ6L2
TNFRSF11A	SEMA6A	SF3B2
TNFSF10	SEMA7A	SF3B3
TNIP3	SENP1	SFI1
TNKS	SEPP1	SFMBT2
TNNI1	SERINC1	SFRP1
TNNI3K	SERINC5	SFRP4
TNRC18	SERPINI1	SFRS18
TNRC6B	SERTAD1	SFT2D1
TNRC6C	SESN3	SFTPD
TOB2	SETD1A	SGCD
TOM1L2	SETX	SGCG
TOMM7	SEZ6L2	SGCZ
TOP2A	SF3B2	SGIP1
TOP3A	SF3B3	SGPL1
TOX	SFI1	SGSM1
TOX2	SFMBT1	SGSM2
TP63	SFMBT2	SH2B1
TP73	SFRS15	SH2D4B
TPK1	SFTA3	SH3GL2
TPO	SFTPB	SH3GL3
TPRG1	SGCB	SH3PXD2A
TRAK1	SGCD	SH3RF2
TRAK2	SGCZ	SH3RF3
TRAP1	SGIP1	SH3TC2
TRAPPC9	SGMS1	SHANK2
TRERF1	SGMS2	SHANK3
TRIM14	SGSM1	SHB
TRIM2	SGSM3	SHISA3
TRIM31	SH2B1	SHOC2
TRIM34	SH2D3A	SHPK
TRIM67	SH3BP4	SHROOM3
TRIM6-TRIM34	SH3GL1	SIAH3
TRIM71	SH3GL2	SIDT1
TRIM9	SH3GL3	SIGLEC12
TRIO	SH3GLB1	SIM1
TRIP11	SH3PXD2A	SIPA1L3
TRIP4	SH3RF2	SIRPA
TRIT1	SH3TC2	SIRPB2
TRPC6	SHANK2	SIRT5
TRPM1	SHB	SIRT6
TRPM3	SHC1	SLC10A7
TRPM8	SHC3	SLC12A1
TRPS1	SHC4	SLC12A8
TRPV1	SHROOM3	SLC13A4
TRPV3	SIAH2	SLC14A1
TSC22D1	SIAH3	SLC15A2
TSC22D2	SIGLEC10	SLC15A4
TSGA10	SIGLEC6	SLC16A10
TSHR	SIGLEC8	SLC16A7
TSHZ3	SIGLECP3	SLC1A1
TSNARE1	SIPA1L3	SLC22A1
TSPAN18	SKIL	SLC22A23
TSPAN19	SLA	SLC22A3
TSPAN5	SLAMF1	SLC23A2
TSPO	SLAMF8	SLC24A2
TTC19	SLC12A1	SLC24A3
TTC27	SLC12A8	SLC25A17
TTC39C	SLC14A2	SLC25A18
TTC7A	SLC16A12	SLC25A25
TTLL12	SLC17A4	SLC25A26
TTLL9	SLC17A6	SLC25A27
TUB	SLC1A1	SLC25A29
TUBGCP5	SLC1A2	SLC25A37
TULP1	SLC1A4	SLC26A5
TWF2	SLC1A7	SLC26A7
TXNDC11	SLC22A23	SLC26A9
TXNRD1	SLC22A4	SLC27A6
TXNRD2	SLC22A6	SLC29A4
TYW1	SLC22A8	SLC2A14
UBASH3B	SLC23A2	SLC2A3
UBE2F	SLC24A2	SLC2A9
UBE2U	SLC24A3	SLC30A7
UBR5	SLC24A5	SLC35F1
UGT2A1	SLC25A13	SLC35F3
UGT2A2	SLC25A21	SLC37A1
UHRF1	SLC25A35	SLC38A10
ULK4	SLC26A7	SLC38A4
[truncated: 483 more rows]

## Sheet: tests
Number of tested values.
PATHOGENS	SUBSISTENCE	CLIMATE
3664	4580	70
12	115	4580
36	125	115
180	65	60
436	110	65
340	50	290
24	30	545
12	200	425
68	545	60
28	425	160
24	215	215
128	320	320
80	35	35
8	55	100
320	625	35
132	105	625
188	35	5
296	155	70
1688	10	355
28	45	130
100	400	235
36	60	370
80	130	20
32	235	25
48	370	2110
80	205	50
168	15	35
12	35	125
4	2110	45
96	15	115
708	50	100
36	60	135
60	5	30
116	70	50
140	100	210
36	55	885
36	75	85
484	60	175
232	15	155
564	25	605
108	210	290
120	120	555
228	885	705
248	85	405
280	175	150
148	15	285
1004	555	310
116	705	1005
136	405	350
488	225	185
356	375	10
168	135	145
8	310	170
16	10	445
8	185	285
20	10	40
16	145	195
80	140	100
104	445	30
196	285	20
60	245	60
20	75	320
256	30	435
96	20	50
76	25	1200
116	20	840
348	320	100
24	120	35
12	435	105
464	25	55
960	15	40
672	580	90
16	10	95
128	1200	115
212	840	265
68	15	265
252	15	55
156	110	480
712	255	315
172	50	535
132	105	890
80	20	25
12	70	45
1180	315	115
36	130	10
184	10	90
28	115	165
44	45	100
112	215	1475
40	10	120
40	90	45
304	165	355
224	40	75
128	1475	35
28	230	140
188	355	50
656	50	5
456	40	440
240	280	50
72	160	15
100	570	280
28	300	5
20	60	820
152	210	570
1048	85	300
152	90	210
76	125	85
504	80	90
408	35	125
240	90	80
48	20	95
72	175	5
328	1310	35
104	190	25
32	630	190
72	510	1310
8	605	20
416	145	630
16	300	510
4	70	605
12	200	145
8	10	300
272	5	200
92	30	10
36	10	70
568	125	130
252	280	90
200	200	50
496	35	125
8	5	520
44	75	20
348	15	5
20	710	55
24	145	35
4	565	10
8	620	100
204	390	45
12	160	70
276	30	55
120	25	315
20	435	565
160	490	250
228	35	620
152	35	15
88	200	35
156	100	95
1364	135	435
24	140	490
4	155	140
56	150	135
408	35	140
244	20	155
640	10	15
104	105	5
708	110	150
156	10	105
360	195	200
784	5	20
184	1705	80
104	85	30
156	40	175
48	105	195
200	150	1705
424	25	180
652	50	5
44	430	35
52	35	130
204	20	60
352	45	70
176	510	20
4	460	50
124	20	10
280	30	365
4	135	170
76	90	195
84	25	10
24	365	510
172	210	105
356	190	460
64	885	25
124	195	135
344	5	25
604	450	305
44	60	800
56	10	215
280	980	885
92	45	5
444	40	10
60	105	980
44	130	95
48	15	105
408	195	130
28	160	195
112	35	45
100	530	160
732	20	250
4	30	530
20	255	75
96	310	20
36	370	205
12	110	160
116	260	255
4	220	65
8	350	220
12	30	110
24	175	260
36	35	95
52	30	350
104	100	40
52	215	125
336	445	335
20	265	30
96	115	105
156	755	110
76	55	100
36	120	120
12	350	445
4	115	80
56	555	130
16	75	140
16	75	265
40	450	155
20	45	755
8	510	35
20	40	5
492	915	40
92	45	350
12	70	75
32	75	60
124	280	450
28	45	510
4	145	40
20	5	25
32	40	915
12	80	5
32	20	25
156	45	60
432	40	60
200	10	50
100	20	45
160	10	75
104	30	280
4	130	145
36	75	95
328	45	35
12	420	40
56	120	155
52	15	80
20	195	30
312	95	10
100	15	130
32	15	5
32	5	20
164	10	175
96	10	420
16	50	120
64	60	95
132	50	20
252	15	170
8	5	35
32	10	25
20	25	15
36	615	165
136	220	20
24	20	30
12	15	615
24	110	35
224	115	220
208	15	135
112	50	5
84	35	110
4	130	95
20	50	220
56	195	5
176	540	120
488	50	15
228	40	25
328	125	10
772	180	130
340	20	35
64	90	40
32	65	55
652	50	85
1248	200	250
184	130	50
628	45	40
232	410	125
188	140	20
260	10	90
156	125	50
16	40	80
816	40	130
356	15	45
32	390	410
4	125	140
464	40	80
852	50	45
104	290	65
256	25	65
224	45	5
1120	15	390
12	5	50
124	80	290
48	35	325
12	245	15
132	5	120
56	205	115
28	25	80
20	50	205
12	120	90
32	90	185
40	185	35
128	70	70
28	105	95
68	455	60
12	280	75
24	25	580
12	65	110
104	260	205
12	45	20
60	110	135
80	10	70
20	105	610
12	25	80
140	205	25
4	20	20
120	85	285
68	40	410
268	70	965
56	610	490
40	45	425
212	135	40
108	60	175
324	20	205
100	410	815
4	965	1560
148	425	785
220	40	290
56	815	235
44	60	65
80	1560	25
276	785	325
168	235	195
164	1020	1020
48	445	445
44	580	15
44	10	25
20	1065	330
4	130	580
12	55	1065
44	280	280
24	55	20
108	1400	1400
192	25	25
24	30	35
112	60	165
28	165	15
60	20	70
36	60	35
100	255	60
696	245	145
2828	75	160
8	25	35
328	15	225
64	35	130
688	145	515
1020	225	465
204	130	60
120	515	15
56	55	20
904	465	15
80	100	40
120	25	265
8	175	135
140	60	65
240	335	150
64	265	55
8	135	405
56	65	275
20	55	30
64	405	110
96	15	75
16	125	65
108	60	20
8	110	55
96	75	85
8	85	345
120	345	60
40	210	55
48	15	15
4	75	105
12	20	90
24	5	30
44	60	65
160	5	240
304	55	110
16	15	140
52	20	15
108	45	75
8	15	35
584	30	250
152	135	35
248	210	60
168	240	125
16	70	870
4	45	3535
36	250	860
60	120	1275
20	35	255
28	195	150
40	3535	1130
32	315	150
160	860	200
8	1275	10
48	180	65
816	255	145
64	150	80
100	1130	65
460	150	110
76	65	70
232	175	80
172	145	120
312	10	20
132	30	530
172	35	185
184	30	190
184	120	25
8	530	100
8	185	450
48	190	5
32	130	770
276	5	35
276	20	200
1664	70	380
1988	55	135
2476	770	730
792	135	20
236	10	190
76	190	310
200	310	15
128	210	90
44	20	60
84	10	220
528	90	340
588	85	35
384	75	275
416	60	30
164	30	1020
40	220	390
176	340	80
292	10	60
144	40	95
60	30	20
52	300	215
416	50	390
124	15	100
24	25	165
184	275	230
28	60	345
4	15	70
16	1020	345
16	35	2080
52	125	2485
632	390	805
8	575	3095
28	35	990
40	20	115
24	290	70
172	390	105
764	100	160
24	165	445
308	120	180
8	15	735
124	345	480
12	465	530
24	70	520
156	345	205
20	2080	450
4	2485	415
124	805	305
16	3095	45
6592	330	220
844	990	365
4	190	60
24	30	180
32	130	75
12	50	65
40	105	520
304	465	10
24	260	190
28	160	230
1704	70	35
1916	445	5
28	180	155
1108	660	60
16	735	85
32	520	65
68	205	30
64	450	790
32	415	145
156	305	75
44	180	335
28	75	140
16	145	70
4	65	275
8	520	35
56	80	50
204	20	215
184	10	955
1528	145	85
132	155	10
208	45	15
12	95	10
344	140	40
56	85	145
24	45	195
1116	55	155
448	40	530
16	30	8240
128	50	1055
128	790	60
100	160	25
8	75	380
12	335	2130
88	140	2395
28	275	1385
0	35	155
8	215	40
16	20	730
420	955	745
8	385	25
76	40	395
188	60	195
20	40	80
136	10	70
880	195	75
256	5	230
288	155	190
340	530	20
24	8240	195
20	1055	25
4	775	20
40	5	30
212	380	5
464	35	230
92	2130	1910
76	2395	165
32	35	45
48	1385	430
28	10	185
1444	155	10
16	730	50
8	20	70
208	745	5
32	85	1395
24	55	560
636	25	160
92	40	25
140	395	170
140	55	20
436	45	35
368	30	20
36	75	25
80	230	130
4	20	235
20	10	125
376	35	1100
68	30	320
48	255	360
16	230	425
732	1910	25
700	165	245
172	260	30
528	45	175
588	125	295
680	430	265
44	185	580
48	70	75
280	280	200
1280	100	35
520	1395	1805
104	5	545
88	30	315
60	35	65
1176	220	5
640	0	260
40	40	35
140	20	795
40	525	115
8	95	175
212	110	390
12	235	175
332	80	545
12	125	20
276	170	55
8	5	470
48	1100	25
104	105	45
208	360	915
20	25	265
40	5	875
8	245	215
388	175	660
288	80	255
84	295	735
72	580	285
36	75	850
120	85	200
88	70	350
36	885	1375
16	45	65
132	1805	1600
100	545	20
24	315	35
736	65	650
20	15	200
8	260	45
28	100	1470
68	795	800
136	115	140
48	175	200
72	175	315
64	545	30
20	460	45
540	55	30
80	5	70
68	55	50
76	50	10
200	90	445
16	165	415
220	25	125
324	5	20
24	515	150
196	60	35
296	470	390
612	25	345
224	15	15
16	915	20
20	265	90
12	875	25
176	215	60
1408	660	5
320	255	70
864	85	485
444	735	90
52	235	110
16	850	105
432	60	90
80	30	415
972	350	360
20	15	110
128	1375	105
156	1600	110
8	60	25
380	650	185
272	60	70
416	30	150
348	1470	25
320	800	10
52	140	25
8	200	110
36	30	45
144	90	35
12	315	165
36	175	45
136	15	920
44	265	170
20	445	675
28	20	95
24	415	25
500	125	180
140	150	405
120	390	30
24	345	50
16	175	85
580	15	25
312	20	205
84	40	245
176	65	370
896	60	240
28	115	45
36	270	765
20	110	280
592	105	15
544	65	1760
176	5	400
584	415	1080
40	360	555
144	45	5
172	25	35
8	5	540
8	185	1215
60	10	25
12	110	160
12	45	195
60	165	475
20	45	245
536	920	195
748	170	15
156	105	340
144	260	435
148	5	100
44	170	30
276	45	310
112	5	445
40	25	400
4	675	245
356	85	30
64	250	180
96	35	625
252	275	175
52	405	150
176	205	15
360	245	80
776	370	280
120	240	725
264	765	390
60	280	25
40	15	10
2744	25	1120
744	40	105
72	220	165
20	40	45
64	1760	80
88	400	215
52	1080	740
108	555	680
24	75	220
132	20	565
20	50	730
60	5	20
152	540	15
252	190	180
160	1215	120
168	160	100
532	195	25
652	475	105
332	245	75
108	340	35
344	520	20
32	130	15
640	245	95
120	435	935
512	30	5
212	25	235
1232	485	180
224	10	185
352	10	345
72	170	35
256	30	445
52	175	70
4	150	50
56	50	10
600	80	45
640	125	15
472	50	80
20	280	50
144	280	10
200	725	80
548	390	20
52	105	50
308	10	120
292	1120	315
632	55	15
40	80	315
44	135	105
416	15	60
68	215	5
484	740	65
44	680	210
152	220	450
908	565	970
100	55	90
104	730	330
64	15	50
104	180	3430
92	120	110
16	215	930
4	25	5
20	105	135
12	75	30
16	165	25
104	10	210
288	10	40
12	125	285
20	15	35
24	30	165
56	15	75
12	35	155
340	20	190
244	20	315
1136	670	80
20	935	75
80	5	665
196	235	815
32	140	415
16	50	15
12	30	15
728	445	430
20	50	30
100	35	50
28	15	40
168	20	730
156	55	100
76	55	800
36	50	150
92	120	85
16	315	640
12	315	480
24	105	265
24	5	65
1152	210	495
1212	130	1540
48	210	120
340	150	440
260	330	265
72	3430	750
28	110	800
388	930	590
372	10	40
4	5	250
516	225	30
16	30	90
132	30	685
224	195	40
384	60	385
244	285	210
808	35	790
464	75	155
644	155	70
420	315	305
8	130	520
688	110	85
244	665	605
376	20	305
256	95	120
1292	430	1135
852	50	130
364	5	130
56	730	445
36	800	185
52	25	655
52	640	170
16	480	15
12	265	35
332	120	115
36	90	60
80	1540	5
124	120	15
68	440	85
72	180	175
368	65	110
48	380	35
740	265	10
36	750	105
84	800	100
36	10	135
48	250	30
20	685	10
44	65	10
8	385	45
484	365	70
164	790	80
376	135	195
192	10	425
116	520	305
84	605	10
88	315	1420
144	1135	135
44	945	70
16	45	40
8	150	20
8	185	15
92	655	910
28	170	25
480	115	125
8	145	310
16	15	95
80	5	195
32	15	210
128	60	55
656	20	20
92	360	20
12	100	45
96	135	20
80	20	90
44	10	25
20	85	140
64	5	80
20	10	35
8	45	1440
8	70	1515
76	150	75
20	15	140
160	195	95
8	305	70
236	1420	45
12	70	185
92	140	35
40	20	325
32	15	35
52	910	485
108	35	110
180	95	465
52	210	55
88	165	20
120	20	645
20	15	65
92	1440	120
32	1515	480
48	60	305
40	425	1010
200	95	525
56	45	860
8	35	470
28	35	320
32	325	585
544	65	1615
12	485	10
92	110	20
372	360	455
40	40	25
28	280	120
176	85	170
32	235	55
452	480	55
16	305	20
28	1010	415
68	1075	110
4	580	45
20	805	20
24	165	110
16	10	25
36	750	10
268	860	80
12	20	40
396	320	155
16	20	20
32	270	10
20	140	10
164	585	20
40	1615	135
124	1065	125
116	140	460
696	15	60
8	20	85
216	455	105
32	5	20
8	30	30
112	120	695
76	170	150
268	40	45
44	15	60
272	150	55
392	45	10
96	20	25
168	40	15
724	155	205
704	20	195
196	85	240
16	90	245
152	10	240
88	385	145
24	135	105
372	125	55
444	25	290
4	460	110
416	925	180
88	85	20
28	10	35
28	695	10
332	450	10
1320	150	5
16	5	35
436	15	235
176	80	70
28	35	600
140	50	1110
972	205	40
284	195	75
24	240	35
364	245	160
500	240	150
476	60	820
580	30	115
68	290	120
116	110	60
8	180	25
16	125	35
108	10	20
4	35	80
20	20	95
72	20	20
520	5	10
480	235	200
516	35	80
128	30	15
560	100	5
8	1110	115
48	75	25
1052	820	110
412	650	60
32	115	85
48	120	30
148	85	75
188	100	65
68	25	60
368	20	50
24	35	135
276	40	190
12	40	225
180	215	35
384	85	45
88	70	65
832	80	540
32	30	60
388	30	155
8	5	5
36	115	110
152	5	150
836	25	45
76	10	30
20	75	20
388	65	60
212	60	50
64	520	25
20	20	10
64	50	5
52	85	70
24	135	45
44	190	115
36	30	75
32	540	35
912	155	15
160	40	680
24	25	465
104	20	690
460	20	145
20	65	235
20	20	265
364	5	5
496	25	80
184	10	30
996	50	40
32	25	565
104	45	45
252	5	100
24	680	20
4	115	90
120	465	20
68	5	370
472	145	335
504	10	495
152	220	40
16	10	25
168	55	55
88	55	90
188	40	85
348	5	470
684	5	260
20	565	180
300	100	100
16	215	870
24	60	805
160	90	145
1064	45	270
240	335	75
36	220	140
92	495	490
56	85	120
232	55	905
108	85	210
20	205	880
4	155	710
4	90	110
16	260	465
16	145	195
32	180	555
32	870	335
52	805	35
200	270	415
228	75	40
744	50	1650
320	490	20
244	90	210
2168	905	55
280	45	545
528	110	175
20	210	220
244	710	1215
12	190	455
188	110	625
92	140	595
36	195	725
52	335	85
524	520	145
12	35	55
48	415	175
40	210	5
544	240	195
116	755	380
24	40	5
16	1650	80
152	65	25
216	545	50
36	235	90
4	175	650
104	220	45
144	1215	310
2688	355	600
296	30	645
40	130	40
888	455	5
1976	625	165
24	75	700
140	725	35
52	55	85
76	350	35
116	175	310
28	35	260
56	55	1315
52	380	40
260	650	515
4	75	60
76	600	70
20	30	40
32	40	45
0	295	185
0	35	235
0	70	40
72	700	50
76	40	460
136	85	50
648	260	345
36	1315	120
56	515	70
192	35	225
56	70	480
512	45	50
12	85	1040
48	185	20
40	460	25
612	65	485
608	50	65
348	50	190
164	430	1045
672	120	95
28	70	700
20	55	35
616	480	265
20	80	80
124	35	10
456	25	25
92	1040	50
44	50	35
164	20	130
96	25	80
104	485	30
44	190	25
36	1045	1140
148	95	40
36	700	130
56	145	575
324	90	65
188	485	455
72	115	620
4	35	40
36	10	10
32	35	85
44	40	1245
76	35	55
80	50	130
216	20	120
20	80	5
24	5	85
244	30	590
68	20	90
24	10	630
116	1140	190
288	130	210
0	575	30
96	10	15
100	455	90
48	620	70
4	140	110
8	55	235
264	95	150
48	80	435
100	1245	175
8	15	50
8	25	400
44	120	375
20	185	20
140	25	30
28	35	50
4	5	1330
40	50	300
56	590	10
692	90	150
752	630	55
84	15	115
4	190	65
84	70	290
28	210	240
20	30	265
420	70	25
40	60	25
72	150	40
24	435	80
240	855	220
48	50	415
56	400	30
308	20	80
28	120	360
72	35	20
12	20	250
20	375	30
12	25	285
132	30	210
204	1330	430
64	125	930
772	300	400
272	45	340
156	45	10
680	40	305
104	150	40
64	125	2710
108	60	350
164	5	135
240	65	660
112	135	135
124	240	125
384	25	140
12	50	305
356	265	30
16	80	15
44	210	230
52	220	260
1020	360	655
20	140	25
12	250	5
580	285	50
20	430	40
20	65	220
928	30	165
8	930	20
4	400	10
1268	85	65
436	40	45
184	40	55
432	2710	175
4	135	3360
488	115	1110
316	125	2470
32	305	150
16	10	10
84	235	65
52	30	850
52	25	200
36	230	150
44	100	135
32	655	35
104	25	55
156	30	30
368	680	65
492	30	325
24	40	385
1444	845	35
260	10	40
64	165	0
260	200	0
144	25	0
16	270	95
292	45	115
312	175	50
160	3360	810
136	1110	45
32	2470	310
20	10	65
1308	185	225
716	850	640
44	200	75
20	95	255
876	20	15
48	150	60
8	175	85
76	95	765
252	45	205
12	145	840
196	35	15
92	20	135
112	95	770
204	60	460
1636	325	290
8	15	160
28	385	125
44	20	45
332	0	570
204	0	205
1152	0	120
156	90	130
1180	45	55
108	40	20
240	115	20
160	810	25
1260	65	65
1264	60	45
24	15	70
40	335	405
48	240	235
112	130	215
1392	40	45
332	255	40
296	60	255
408	35	100
124	85	100
24	765	85
16	760	45
16	435	70
24	40	270
4	105	35
268	840	115
488	60	25
20	770	15
368	290	305
964	55	30
1128	40	20
4	125	145
104	105	360
80	570	150
212	20	5
44	320	130
1684	60	20
292	20	110
12	25	230
4	185	140
76	70	20
8	405	15
4	280	125
12	235	10
140	5	165
428	365	15
300	45	10
232	80	10
44	40	175
132	505	865
32	185	5
20	205	20
28	95	940
820	100	50
64	85	55
192	80	20
80	95	50
548	20	525
540	35	40
340	305	65
444	35	40
76	25	340
60	125	385
48	35	40
232	330	245
908	110	35
1972	140	25
40	125	15
72	50	75
76	25	25
40	70	100
40	35	30
156	865	200
376	20	505
108	940	965
68	105	310
48	50	850
276	25	130
1096	525	135
56	65	210
752	70	140
316	65	15
140	340	60
444	25	445
420	15	65
32	25	1275
32	190	10
564	20	50
408	50	20
100	30	25
20	5	1160
992	50	20
68	230	40
300	170	10
136	20	5
300	200	40
196	505	195
36	965	1585
104	310	545
160	340	230
12	75	540
40	850	5
232	630	610
576	130	700
388	135	15
64	140	20
48	480	20
424	445	50
52	1275	30
68	105	180
468	50	275
76	725	25
212	1160	10
176	20	130
48	20	195
16	195	75
20	1585	10
60	545	125
372	230	170
36	540	670
24	610	100
332	395	55
16	700	30
316	105	1805
212	145	325
316	50	85
36	40	325
8	130	365
244	195	390
32	90	60
216	15	200
52	10	180
356	460	60
220	615	25
148	670	1635
32	55	895
16	1805	55
24	325	1095
168	155	130
132	80	170
1044	85	120
244	325	120
380	60	130
148	390	90
220	175	315
164	1635	485
76	55	10
144	1095	25
208	40	140
320	130	255
172	60	2045
4	210	45
124	120	10
52	35	10
60	130	80
44	25	415
16	60	150
796	95	70
300	315	1440
584	485	195
88	80	1475
8	25	30
44	105	1575
100	2045	1580
40	5	185
8	45	35
36	10	50
4	295	1740
64	90	415
44	80	215
60	415	405
44	150	510
92	10	35
96	505	55
472	1440	25
88	195	20
104	1475	610
88	10	130
24	1575	45
232	1580	25
16	185	65
56	95	120
28	60	460
264	1740	5
92	215	1205
232	510	770
32	5	1410
4	20	50
460	40	265
12	25	30
148	15	2105
216	335	95
280	610	365
12	10	70
460	120	15
544	15	5
912	460	10
340	1205	30
224	770	15
1592	1410	30
4	50	30
188	25	15
4	30	5
48	2105	5
220	95	280
256	365	375
112	5	160
108	10	290
1012	15	165
32	15	35
12	10	25
76	5	140
60	175	60
44	15	25
108	270	25
16	535	55
152	290	25
32	165	30
128	35	1025
152	25	65
4	140	70
28	80	85
52	15	685
272	55	675
60	10	425
100	1025	555
80	65	95
120	100	75
72	15	50
3912	70	125
200	85	65
240	685	615
912	15	1135
912	675	2465
344	425	65
1572	555	90
12	135	15
44	60	195
44	290	50
28	80	495
436	85	80
44	615	345
80	2465	1370
12	65	35
48	90	350
76	130	80
60	270	395
32	395	175
52	95	10
252	5	425
120	30	115
300	495	555
84	345	40
24	1370	30
24	10	5
528	175	410
60	100	510
44	95	585
384	80	1240
40	165	75
48	155	375
40	145	375
80	145	245
32	140	130
248	130	385
320	120	130
24	110	230
28	145	290
184	145	720
432	140	235
276	125	485
16	110	25
44	105	195
52	95	35
32	60	240
20	35	235
116	30	530
1060	80	80
12	10	65
96	175	85
84	105	80
132	115	50
24	525	585
16	80	420
8	5	35
64	35	65
36	705	10
784	410	145
180	510	70
28	545	15
260	585	60
72	25	220
28	1240	20
32	20	55
72	75	25
212	45	465
312	375	5
24	375	165
12	245	415
68	130	35
28	385	20
892	100	20
760	15	85
36	150	15
64	85	170
212	290	395
188	330	395
400	485	45
212	5	115
224	170	45
16	45	305
308	65	40
132	40	185
196	110	55
36	585	80
144	420	275
92	355	10
248	30	75
40	145	395
616	70	105
380	265	130
1316	15	185
116	75	20
24	465	65
32	40	30
120	65	210
12	90	1305
848	415	305
88	20	325
8	85	15
40	5	125
152	170	275
36	395	205
332	265	95
8	395	145
108	45	645
76	10	260
364	60	330
132	185	40
16	55	25
100	70	40
924	275	105
1148	80	155
12	110	10
504	35	995
112	275	375
300	55	730
348	75	125
264	95	20
12	395	45
84	105	50
428	185	30
112	30	10
36	40	5
84	260	65
160	1305	10
24	305	80
12	325	120
32	475	110
84	245	110
300	275	235
1160	205	75
96	30	590
24	10	10
244	180	35
220	330	55
704	25	60
16	20	30
236	25	210
188	25	80
48	400	115
36	75	130
20	40	290
16	45	10
24	25	45
8	145	45
436	995	40
40	375	10
28	730	30
32	355	145
52	110	30
224	10	575
2212	35	185
8	40	270
20	55	435
140	125	20
224	45	350
28	15	185
88	10	360
108	55	65
40	10	575
260	590	680
68	110	495
32	235	1140
220	405	410
16	45	35
40	290	45
136	40	1990
56	70	15
36	590	235
80	30	55
4	80	5
80	545	275
156	290	165
208	10	45
40	55	5
36	45	140
28	30	135
112	30	5
144	575	1265
268	100	20
52	5	35
120	40	95
28	270	75
12	20	55
56	350	105
68	15	55
76	80	20
200	680	25
212	1140	5
32	410	135
360	35	190
684	425	70
616	1990	25
12	200	125
12	20	30
28	35	90
56	235	4890
40	85	1155
152	30	40
72	5	300
272	15	1140
16	5	430
320	275	145
500	175	1965
44	45	20
88	55	480
4	30	10
688	5	20
144	135	150
12	15	545
256	1265	25
56	40	30
136	65	45
212	95	100
108	75	20
52	125	20
4	35	105
152	105	75
124	150	35
112	190	315
36	5	375
64	70	30
840	65	30
108	125	65
64	100	660
412	45	40
28	30	270
1060	270	70
40	4890	480
168	1155	155
328	120	60
16	300	100
56	1140	40
696	1140	400
60	265	435
76	430	130
20	145	230
168	1965	540
4	175	5
12	5	70
456	80	20
12	20	65
52	480	10
104	150	35
724	25	40
160	10	205
4	45	110
8	80	105
312	20	260
568	15	50
480	25	1325
1072	50	120
548	315	20
176	40	160
40	45	105
1460	30	25
144	20	190
28	15	165
684	125	30
220	660	20
32	25	80
24	270	110
16	480	980
44	155	225
68	60	165
116	125	60
312	40	140
104	310	325
72	435	90
192	35	35
168	540	300
32	345	105
116	20	35
236	35	390
24	10	175
112	10	85
48	15	90
12	10	1115
12	205	950
60	30	65
220	50	155
84	110	55
224	260	265
192	80	55
44	1325	500
212	120	460
236	165	265
96	80	60
688	60	385
164	140	165
132	980	20
304	165	125
160	40	365
348	140	55
12	10	30
108	45	125
88	325	30
204	300	310
204	105	75
616	265	110
92	75	125
40	35	50
28	390	770
64	175	770
4	50	40
396	1115	475
12	950	1645
264	25	180
268	45	25
60	105	100
228	155	145
808	55	15
660	235	30
280	30	55
240	500	40
412	20	20
60	165	25
180	30	25
28	5	25
408	35	5
376	245	110
184	180	20
12	770	20
16	770	190
260	280	90
44	1645	225
124	30	415
16	55	35
324	140	80
72	150	110
500	40	125
128	20	1155
140	10	1435
28	30	60
104	1060	50
4	20	630
160	50	140
240	15	150
164	415	20
236	35	15
128	160	55
96	30	435
8	455	105
56	35	80
64	60	465
40	85	40
24	70	185
152	125	10
4	1155	35
324	1435	35
244	35	330
28	60	375
632	15	105
876	45	535
776	375	190
12	150	135
456	45	30
4	30	170
52	55	145
140	80	5
24	25	75
24	35	105
52	185	375
32	220	130
196	95	60
144	10	1450
36	330	30
156	50	55
8	375	110
264	105	35
16	535	25
28	190	10
76	195	5
408	80	20
1484	170	20
24	75	110
216	35	275
380	40	880
28	40	90
88	375	40
4	20	10
72	245	295
12	165	5
52	25	255
16	1450	100
36	110	40
4	35	45
60	95	25
60	20	100
368	110	30
20	305	445
188	170	10
52	90	545
32	880	10
116	335	15
32	40	30
36	30	105
132	5	285
20	5	50
288	255	35
52	100	20
100	5	20
64	30	40
4	10	460
40	120	280
12	10	2765
4	15	325
16	30	90
440	105	280
204	115	65
328	285	5
48	55	250
324	20	480
168	5	240
176	10	325
128	460	85
40	2765	415
60	325	85
884	430	620
188	35	30
48	280	170
92	20	5
52	5	45
48	30	50
80	105	420
124	10	145
44	480	170
236	240	10
356	15	100
40	325	260
24	85	75
40	85	50
176	620	35
148	170	20
652	10	180
244	145	85
156	275	335
68	420	55
56	25	65
76	145	35
40	5	50
12	40	60
196	20	70
108	10	250
148	260	55
292	20	375
8	165	75
196	40	180
28	25	450
24	85	855
196	335	30
152	150	30
280	140	20
32	20	160
64	95	20
104	250	15
56	265	95
20	40	70
12	105	145
52	375	105
68	40	90
92	5	10
64	15	70
268	180	15
44	450	340
32	855	40
68	20	400
92	105	625
80	770	110
56	5	65
408	145	80
[truncated: 483 more rows]
