# Supplementary material for: Signatures of Environmental Genetic Adaptation Pinpoint Pathogens as the Main Selective Pressure through Human Evolution
Source: PLoS Genet. 2011 Nov 3;7(11):e1002355. doi: 10.1371/journal.pgen.1002355 (PMC3207877; doi:10.1371/journal.pgen.1002355)
Supplement: Table S8 — Annotation of genes correlated with pathogen diversity. (XLS) [file pgen.1002355.s012.xls]

## Sheet: annotation
Gene Symbol	Entrez Gene ID	Aliases	Gene Name	Location	Bibliographic evidences for interaction to bacteria	Bibliographic evidences for interaction to viruses	Bibliographic evidences for interaction to protozoa	Bibliographic evidences for interaction to helminths	Bibliographic evidences for a role in immunity	Bibliographic evidences for a role in immunity	Bibliographic evidences for a role in immunity
ACTN1	87	FLJ40884, FLJ54432	actinin, alpha 1	14q22-q24
ADAM17	6868	ADAM18, CD156B, CSVP, MGC71942, TACE	ADAM metallopeptidase domain 17	2p25	Saha et al. 2010	Jia et al. 2009			Long et al. 2010
ADH1C	126	ADH3	alcohol dehydrogenase 1C (class I), gamma polypeptide	4q23
AFF4	27125	HSPC092, AF5Q31, MCEF, MGC75036	AF4/FMR2 family, member 4	5q31
ANTXR2	118429	CMG-2, CMG2, FLJ31074, ISH, JHF, MGC111533, MGC45856	anthrax toxin receptor 2	4q21.21	Liu et al. 2010				Wu et al. 2009
ARID1A	8289	RP1-50O24.1, B120, BAF250, BAF250a, BM029, C1orf4, P270, SMARCF1	AT rich interactive domain 1A	1p35.3
ARMC8	8289	RP1-50O24.1, B120, BAF250, BAF250a, BM029, C1orf4, P270, SMARCF1	AT rich interactive domain 1A (SWI-like)	1p35.3
ARRDC5	645432		arrestin domain containing 5	19p13.3
ATP10D	57205		ATPase, class V, type 10D	4p12
ATP1B1	481	ATP1B, MGC1798	ATPase, Na+/K+ transporting, beta 1 polypeptide	1q24		Mi et al. 2010			Vereninov et al. 2001
ATXN7L2	127002	FLJ00381, MGC46534	ataxin 7-like 2	1p13.3
BBX	56987		bobby sox homolog (Drosophila)	3q13.1
BCL2L15	440603	BCL2-like 15	Bfk, C1orf178, FLJ22588	1p13.2
BIK	638	BIP1, BP4, NBK	BCL2-interacting killer (apoptosis-inducing)	22q13.31
C11orf46	120534	FLJ38968, dJ299F11.1	chromosome 11 open reading frame 46	11p14.1
C14orf133	63894	FLJ12707, SPE-39, SPE39, VPS16B, hSPE-39	FLJ12707, SPE-39, SPE39, VPS16B, hSPE-39	14q24.3-q31
C16orf55	124045		chromosome 16 open reading frame 55	16q24.3
C18orf8	29919	FLJ23453, HsT2591, MIC1	chromosome 18 open reading frame 8	18q11.2
C4orf30	54876		DDB1 and CUL4 associated factor 16	4p15.31
C4orf37	285555		chromosome 4 open reading frame 37	19p13.12
CCDC105	126402		coiled-coil domain containing 105	19p13.12
CHMP4B	128866	C20orf178, CHMP4A, CTPP3, SNF7, SNF7-2, Shax1, VPS32B, Vps32-2, dJ553F4.4	chromatin modifying protein 4B	20q11.22		Kuang et al. 2011
CLDN1	9076	UNQ481/PRO944, CLD1, ILVASC, SEMP1	claudin 1	3q28-q29		Lupberger et al. 2011	Troeger et al. 2007		Ogasawara et al. 2010
CLP1	10978	HEAB, hClp1	CLP1, cleavage and polyadenylation factor I subunit, homolog (S. cerevisiae)	11q12
DENR	8562	H14, DRP, DRP1, SMAP-3	density-regulated protein	12q24.31
DEPDC1	55635	DEP.8, DEPDC1-V2, DEPDC1A, FLJ20354, SDP35	DEP domain containing 1	1p31.2
DHFR	1719	DHFRP1, DYR	dihydrofolate reductase	5q11.2-q13.2						Klinghoffer et al. 2009
DHODH	1723		dihydroorotate dehydrogenase	16q22	Walse et al. 2008	Evers et al. 2005; Wang et al. 2011	Imwong et al. 2011; Alam et al. 2011		Nahum et al. 2009
DLGAP3	58512	DAP3, SAPAP3	discs, large (Drosophila) homolog-associated protein 3	1p35.3-p34.1
DSC1	1823	CDHF1, DG2/DG3	desmocollin 1	18q12.2|18q12.1
EPHA10	284656	FLJ16103, FLJ33655, MGC43817	EPH receptor A10	1p34.3
ETNK1	55500		ethanolamine kinase 1	12p12.1
FAM131C	348487	C1orf117, FLJ36766, RP11-5P18.9	family with sequence similarity 131, member C	1p36.13
FAM18B2	201158	Nbla10383, MGC8763	family with sequence similarity 18, member B2	17p12
FBXL4	26235	FBL4, FBL5	F-box and leucine-rich repeat protein 4	6q16.1-q16.3
FOXRED1	55572		FAD-dependent oxidoreductase domain containing 1	11q24.2
GDF15	9518	GDF-15, MIC-1, MIC1, NAG-1, PDF, PLAB, PTGFB	growth differentiation factor 15	19p13.11		Si et al. 2011			De Jager et al. 2011	Flach et al. 2007	Growth differentiation factor 15, a novel acute phase response gene in Japanese flounder, Paralichthys olivaceus.
GFI1	2672	FLJ94509, GFI-1, SCN2, ZNF163	growth factor independent 1 transcription repressor	1p22	Flach et al. 2007; Parra et al. 2009				Armistead et al. 2010
GINS1	9837	RP4-691N24.2, KIAA0186, PSF1	GINS complex subunit 1 (Psf1 homolog)	20p11.21
GPR155	151556		G protein-coupled receptor 155	2q31.1
GTF2E1	2960	FE, TF2E1, TFIIE-A	general transcription factor IIE, polypeptide 1, alpha 56kDa	3q21-q24
HSD17B4	3295	DBP, MFE-2, MPF-2, SDR8C1	hydroxysteroid (17-beta) dehydrogenase 4	5q21
ICAM4	3386	CD242, LW	intercellular adhesion molecule 4 (Landsteiner-Wiener blood group)	19p13.2-cen		Lee et al. 2003
IL6	3569	BSF2, HGF, HSF, IFNB2, IL-6	interleukin 6 (interferon, beta 2)	7p21	Whelehan et al. 2011	Blanc et al. 2011; Mata et al. 2011	Burgess et al. 2010	Chavarria et al. 2005	Iikura et al. 2011
ILDR1	286676	ILDR1alpha, ILDR1beta, MGC50831	immunoglobulin-like domain containing receptor 1	3q13.33
IRX2	153572	IRXA2	iroquois homeobox 2	5p15.33
ITGAL	3683	CD11A, LFA-1, LFA1A	integrin, alpha L (antigen CD11A (p180), lymphocyte function-associated antigen 1; alpha polypeptide)	16p11.2
ITPRIPL1	150771	KIAA1754L	inositol 1,4,5-trisphosphate receptor interacting protein-like 1	2q11.2
IZUMO1	284359		izumo sperm-egg fusion 1	19q13.33
KCNC3	3748	KSHIIID, KV3.3, SCA13	potassium voltage-gated channel, Shaw-related subfamily, member 3 [	19q13.33
KCTD15	79047		potassium voltage-gated channel, Shaw-related subfamily, member 3	19q13.11
KIAA0284	283638	FAM68C, MGC131679	KIAA0284	14q32.33
KIAA0748	9840	HSPC257	KIAA0748	12q13.2
KLK13	26085	DKFZp586J1923, KLK-L4, KLKL4	kallikrein-related peptidase 13	19q13.33
KRT9	3857	CK-9, EPPK, K9	keratin 9	17q21.1-q21.2
LAG3	3902	CD223	lymphocyte-activation gene 3	12p13.32		Li et al. 2009			Subleski et al. 2011	Brismar Wendels et al. 2010
LARP1	23367	KIAA0731, LARP, MGC19556	La ribonucleoprotein domain family, member 1	5q33.2
LILRA3	11026	XXbac-BCX403H19.1, CD85E, HM31, HM43, ILT6, LIR-4, LIR4, e3	leukocyte immunoglobulin-like receptor, subfamily A (without TM domain), member 3	19q13.4					Hirayasu et al. 2008
LMBR1L	55716	UNQ458/PRO783, FLJ10494, FLJ36251, KIAA1174, LIMR	limb region 1 homolog (mouse)-like	12q13.12
LOC729234	729234		fumarylacetoacetate hydrolase domain containing 2 pseudogene	2q11.1
LRRC19	64922		leucine rich repeat containing 19	9p21.2					Chai et al. 2009
MLH3	27030	HNPCC7, MGC138372	mutL homolog 3 (E. coli)	14q24.3
MN1	4330	CTA-437G10__B.1, MGCR, MGCR1, MGCR1-PEN, dJ353E16.2	meningioma (disrupted in balanced translocation) 1	22q12.1
MSH6	2956	GTBP, HNPCC5, HSAP	mutS homolog 6 (E. coli)	2p16					Wiesendanger et al. 2000
MYD88	4615	MYD88D	myeloid differentiation primary response gene (88)	4615	Cohen-Poradosu et al. 2011	Kane et al. 2011	Kordes et al. 2011	Puneet et al. 2011
NAALADL1	10004		N-acetylated alpha-linked acidic dipeptidase-like 1	11q12					Xu et al. 2011	Ryan et al. 2011
NMB	4828	MGC17211, MGC2277, MGC3936	neuromedin B	15q22-qter
NMT1	4836	NMT	N-myristoyltransferase 1 [	17q21.31	Shrivastav et al. 2010				Boisson et al. 2003
NPC1	4864	FLJ98532, NPC	Niemann-Pick disease, type C1	18q11-q12	Watarai et al. 2002	Tang et al. 2009		Sym et al. 2000	Sagiv et al. 2006
NRG1	3084	ARIA, GGF, GGF2, HGL, HRG, HRG1, HRGA, MST131, NDF, SMDF	neuregulin 1	8p12					Tavanti et al. 2006
NRTN	4902	NTN	neurturin	19p13.3						Vargas-Leal et al. 2005
NUB1	51667	BS4, NUB1L, NYREN18	negative regulator of ubiquitin-like proteins 1	7q36
PCCA	5095	RP11-151A6.1	propionyl CoA carboxylase, alpha polypeptide	13q32
PIGL	9487		phosphatidylinositol glycan anchor biosynthesis, class L	17p12-p11.2
PLEKHH2	130271		pleckstrin homology domain containing, family H (with MyTH4 domain) member 2	2p21
PLEKHO2	80301	PP9099, DKFZp761K2312, FLJ38884, PLEKHQ1, PP1628, pp9099	pleckstrin homology domain containing, family O member 2	15q22.1
PON2	5445		paraoxonase 2	7q21.3	Ozer et al. 2005				Yuan et al. 2010	Altenhofer et al. 2010
PSKH1	5681		protein serine kinase H1	16q22.1
PYGB	5834	RP5-965G21.1, MGC9213	phosphorylase, glycogen; brain	20p11.2-p11.1
RMND5A	64795	CTLH, FLJ12753, FLJ13910, FLJ21795, MGC78451, RMD5, p44CTLH	required for meiotic nuclear division 5 homolog A (S. cerevisiae)	2p11.2
RPAIN	84268		RPA interacting protein	17p13.2					Zuniga et al. 2011
RPL3	6122	OK/SW-cl.32, L3, MGC104284, TARBP-B	ribosomal protein L3 [	22q13
SCAND2	54581		SCAN domain containing 2 pseudogene	15q25.2
SIPA1L2	57568		signal-induced proliferation-associated 1 like 2	1q42.2
SLC20A1	6574		solute carrier family 20 (phosphate transporter), member 1	2q11-q14
SLC35F3	148641		solute carrier family 35, member F3	1q42.2
SLC5A6	8884		solute carrier family 5 (sodium-dependent vitamin transporter), member 6	2p23
SLC9A4	389015	DKFZp313B031, NHE4	solute carrier family 9 (sodium/hydrogen exchanger), member 4	2q12.1
SMG1	23049	61E3.4, ATX, KIAA0421, LIP	smg-1 homolog, phosphatidylinositol 3-kinase-related kinase (C. elegans)	16p12.3		Prokopczyk et al. 2009
STIL	6491	RP1-18D14.8, DKFZp686O09161, MCPH7, SIL	SCL/TAL1 interrupting locus	1p32
TAL1	6886	SCL, TCL5, bHLHa17, tal-1	T-cell acute lymphocytic leukemia 1 [	1p32					Cambot et al. 2002
TEAD1	7003	AA, FLJ17970, NTEF-1, REF1, TCF-13, TCF13, TEAD-1, TEF-1	TEA domain family member 1 (SV40 transcriptional enhancer factor)	11p15.2
TECPR1	25851	DKFZP434B0335, FLJ23419, FLJ90593	tectonin beta-propeller repeat containing 1	7q21.3	Ogawa et al. 2011
TM4SF19	116211	OCTM4	transmembrane 4 L six family member 19	3q29
TMED10	10972	P24(DELTA), S31I125, S31III125, TMP21, Tmp-21-I, p23	transmembrane emp24-like trafficking protein 10 (yeast)	14q24.3
TRIM46	80128	RP11-263K19.1, FLJ23229, GENEY, TRIFIC	tripartite motif containing 46	1q22
TRUB1	142940	PUS4	TruB pseudouridine (psi) synthase homolog 1 (E. coli)	10q25.3
USP6NL	9712	RP11-89C21.1, KIAA0019, RNTRE, TRE2NL	USP6 N-terminal like	10p13
WIPF1	7456	MGC111041, PRPL-2, WASPIP, WIP	WAS/WASL interacting protein family, member 1	2q31.1					Krzewski et al. 2008
ZNF133	7692	RP4-568F9.5, ZNF150, pHZ-13, pHZ-66	zinc finger protein 133	20p11.23
ZNF23	7571	KOX16, MGC57283, ZNF359, ZNF612, Zfp612	zinc finger protein 23 (KOX 16)	16q22
ZNF267	10308		zinc finger protein 267	16p11.2
ZNF628	89887		Zinc finger protein 628	19q13.42

## Sheet: references
References
Alam MT, de Souza DK, Vinayak S, Griffing SM, Poe AC, et al. (2011) Selective sweeps and genetic lineages of plasmodium falciparum drug -resistant alleles in ghana. J Infect Dis 203(2): 220-227.
Altenhofer S, Witte I, Teiber JF, Wilgenbus P, Pautz A, et al. (2010) One enzyme, two functions: PON2 prevents mitochondrial superoxide formation and apoptosis independent from its lactonase activity. J Biol Chem 285(32): 24398-24403.
Armistead PM, Wieder E, Akande O, Alatrash G, Quintanilla K, et al. (2010) Cyclic neutropenia associated with T cell immunity to granulocyte proteases and a double de novo mutation in GFI1, a transcriptional regulator of ELANE. Br J Haematol 150(6): 716-719.
Blanc M, Hsieh WY, Robertson KA, Watterson S, Shui G, et al. (2011) Host defense against viral infection involves interferon mediated down-regulation of sterol biosynthesis. PLoS Biol 9(3): e1000598.
Boisson B, Giglione C, Meinnel T. (2003) Unexpected protein families including cell defense components feature in the N-myristoylome of a higher eukaryote. J Biol Chem 278(44): 43418-43429.
Brismar Wendel S, Kaldensjo T, Peterson P, Andersson S, Broliden K, et al. (2010) Slumbering mucosal immune response in the cervix of human papillomavirus DNA-positive and -negative women. Int J Oncol 37(6): 1565-1573.
Burgess ST, Frew D, Nunn F, Watkins CA, McNeilly TN, et al. (2010) Transcriptomic analysis of the temporal host response to skin infestation with the ectoparasitic mite psoroptes ovis. BMC Genomics 11: 624.
Cambot M, Aresta S, Kahn-Perles B, de Gunzburg J, Romeo PH. (2002) Human immune associated nucleotide 1: A member of a new guanosine triphosphatase family expressed in resting T and B cells. Blood 99(9): 3293-3301.
Chai L, Dai L, Che Y, Xu J, Liu G, et al. (2009) LRRC19, a novel member of the leucine-rich repeat protein family, activates NF-kappaB and induces expression of proinflammatory cytokines. Biochem Biophys Res Commun 388(3): 543-548.
Chavarria A, Fleury A, Garcia E, Marquez C, Fragoso G, et al. (2005) Relationship between the clinical heterogeneity of neurocysticercosis and the immune-inflammatory profiles. Clin Immunol 116(3): 271-278.
Cohen-Poradosu R, McLoughlin RM, Lee JC, Kasper DL. (2011) Bacteroides fragilis-stimulated interleukin-10 contains expanding disease. J Infect Dis 204(3): 363-371.
de Jager SC, Bermudez B, Bot I, Koenen RR, Bot M, et al. (2011) Growth differentiation factor 15 deficiency protects against atherosclerosis by attenuating CCR2-mediated macrophage chemotaxis. J Exp Med 208(2): 217-225.
Evers DL, Wang X, Huong SM, Andreoni KA, Huang ES. (2005) Inhibition of human cytomegalovirus signaling and replication by the immunosuppressant FK778. Antiviral Res 65(1): 1-12.
Flach CF, Qadri F, Bhuiyan TR, Alam NH, Jennische E, et al. (2007) Broad up-regulation of innate defense factors during acute cholera. Infect Immun 75(5): 2343-2350.
Hirayasu K, Ohashi J, Tanaka H, Kashiwase K, Ogawa A, et al. (2008) Evidence for natural selection on leukocyte immunoglobulin-like receptors for HLA class I in northeast asians. Am J Hum Genet 82(5): 1075-1083.
Iikura K, Katsunuma T, Saika S, Saito S, Ichinohe S, et al. (2011) Peripheral blood mononuclear cells from patients with bronchial asthma show impaired innate immune responses to rhinovirus in vitro. Int Arch Allergy Immunol 155 Suppl 1: 27-33.
Imwong M, Russell B, Suwanarusk R, Nzila A, Leimanis ML, et al. (2011) Methotrexate is highly potent against pyrimethamine-resistant plasmodium vivax. J Infect Dis 203(2): 207-210.
Jia HP, Look DC, Tan P, Shi L, Hickey M, et al. (2009) Ectodomain shedding of angiotensin converting enzyme 2 in human airway epithelia. Am J Physiol Lung Cell Mol Physiol 297(1): L84-96.
Kane M, Case LK, Wang C, Yurkovetskiy L, Dikiy S, et al. (2011) Innate immune sensing of retroviral infection via toll-like receptor 7 occurs upon viral entry. Immunity 35(1): 135-145.
Klinghoffer RA, Frazier J, Annis J, Berndt JD, Roberts BS, et al. (2009) A lentivirus-mediated genetic screen identifies dihydrofolate reductase (DHFR) as a modulator of beta-catenin/GSK3 signaling. PLoS One 4(9): e6892.
Kordes M, Matuschewski K, Hafalla JC. (2011) Caspase-1 activation of IL-1{beta} and IL18 is dispensable for the induction of experimental cerebral malaria. Infect Immun .
Krzewski K, Chen X, Strominger JL. (2008) WIP is essential for lytic granule polarization and NK cell cytotoxicity. Proc Natl Acad Sci U S A 105(7): 2568-2573.
Kuang Z, Seo EJ, Leis J. (2011) Mechanism of inhibition of retrovirus release from cells by interferon-induced gene ISG15. J Virol 85(14): 7153-7161.
Lee G, Spring FA, Parsons SF, Mankelow TJ, Peters LL, et al. (2003) Novel secreted isoform of adhesion molecule ICAM-4: Potential regulator of membrane-associated ICAM-4 interactions. Blood 101(5): 1790-1797.
Li Q, Smith AJ, Schacker TW, Carlis JV, Duan L, et al. (2009) Microarray analysis of lymphatic tissue reveals stage-specific, gene expression signatures in HIV-1 infection. J Immunol 183(3): 1975-1982.
Liu S, Miller-Randolph S, Crown D, Moayeri M, Sastalla I, et al. (2010) Anthrax toxin targeting of myeloid cells through the CMG2 receptor is essential for establishment of bacillus anthracis infections in mice. Cell Host Microbe 8(5): 455-462.
Long C, Wang Y, Herrera AH, Horiuchi K, Walcheck B. (2010) In vivo role of leukocyte ADAM17 in the inflammatory and host responses during E. coli-mediated peritonitis. J Leukoc Biol 87(6): 1097-1101.
Lupberger J, Zeisel MB, Xiao F, Thumann C, Fofana I, et al. (2011) EGFR and EphA2 are host factors for hepatitis C virus entry and possible targets for antiviral therapy. Nat Med 17(5): 589-595.
Mata M, Morcillo E, Gimeno C, Cortijo J. (2011) N-acetyl-l-cysteine (NAC) inhibit mucin synthesis and pro-inflammatory mediators in alveolar type II epithelial cells infected with influenza virus A and B and with respiratory syncytial virus (RSV). Biochem Pharmacol .
Mi S, Li Y, Yan J, Gao GF. (2010) Na(+)/K (+)-ATPase beta1 subunit interacts with M2 proteins of influenza A and B viruses and affects the virus replication. Sci China Life Sci 53(9): 1098-1105.
Nahum A, Erhart A, Ahounou D, Bonou D, Van Overmeir C, et al. (2009) Extended high efficacy of the combination sulphadoxine-pyrimethamine with artesunate in children with uncomplicated falciparum malaria on the benin coast, west africa. Malar J 8: 37.
Ogasawara N, Kojima T, Go M, Ohkuni T, Koizumi J, et al. (2010) PPARgamma agonists upregulate the barrier function of tight junctions via a PKC pathway in human nasal epithelial cells. Pharmacol Res 61(6): 489-498.
Ogawa M, Yoshikawa Y, Kobayashi T, Mimuro H, Fukumatsu M, et al. (2011) A Tecpr1-dependent selective autophagy pathway targets bacterial pathogens. Cell Host Microbe 9(5): 376-389.
Ozer EA, Pezzulo A, Shih DM, Chun C, Furlong C, et al. (2005) Human and murine paraoxonase 1 are host modulators of pseudomonas aeruginosa quorum-sensing. FEMS Microbiol Lett 253(1): 29-37.
Parra M, Yang AL, Lim J, Kolibab K, Derrick S, et al. (2009) Development of a murine mycobacterial growth inhibition assay for evaluating vaccines against mycobacterium tuberculosis. Clin Vaccine Immunol 16(7): 1025-1032.
Prokopczyk B, Sinha I, Trushin N, Freeman WM, El-Bayoumy K. (2009) Gene expression profiles in HPV-immortalized human cervical cells treated with the nicotine-derived carcinogen 4-(methylnitrosamino)-1-(3-pyridyl)-1-butanone. Chem Biol Interact 177(3): 173-180.
Puneet P, McGrath MA, Tay HK, Al-Riyami L, Rzepecka J, et al. (2011) The helminth product ES-62 protects against septic shock via toll-like receptor 4-dependent autophagosomal degradation of the adaptor MyD88. Nat Immunol 12(4): 344-351.
Ryan A, Lynch M, Smith SM, Amu S, Nel HJ, et al. (2011) A role for TLR4 in clostridium difficile infection and the recognition of surface layer proteins. PLoS Pathog 7(6): e1002076.
Sagiv Y, Hudspeth K, Mattner J, Schrantz N, Stern RK, et al. (2006) Cutting edge: Impaired glycosphingolipid trafficking and NKT cell development in mice lacking niemann-pick type C1 protein. J Immunol 177(1): 26-30.
Saha A, Backert S, Hammond CE, Gooz M, Smolka AJ. (2010) Helicobacter pylori CagL activates ADAM17 to induce repression of the gastric H, K-ATPase alpha subunit. Gastroenterology 139(1): 239-248.
Shrivastav A, Suri SS, Mohr R, Janardhan KS, Sharma RK, et al. (2010) Expression and activity of N-myristoyltransferase in lung inflammation of cattle and its role in neutrophil apoptosis. Vet Res 41(1): 9.
Si Y, Liu X, Cheng M, Wang M, Gong Q, et al. (2011) Growth differentiation factor 15 is induced by hepatitis C virus infection and regulates hepatocellular carcinoma-related genes. PLoS One 6(5): e19967.
Subleski JJ, Hall VL, Wolfe TB, Scarzello AJ, Weiss JM, et al. (2011) TCR-dependent and -independent activation underlie liver-specific regulation of NKT cells. J Immunol 186(2): 838-847.
Sym M, Basson M, Johnson C. (2000) A model for niemann-pick type C disease in the nematode caenorhabditis elegans. Curr Biol 10(9): 527-530.
Tang Y, Leao IC, Coleman EM, Broughton RS, Hildreth JE. (2009) Deficiency of niemann-pick type C-1 protein impairs release of human immunodeficiency virus type 1 and results in gag accumulation in late endosomal/lysosomal compartments. J Virol 83(16): 7982-7995.
Tavanti A, Campa D, Bertozzi A, Pardini G, Naglik JR, et al. (2006) Candida albicans isolates with different genomic backgrounds display a differential response to macrophage infection. Microbes Infect 8(3): 791-800.
Troeger H, Epple HJ, Schneider T, Wahnschaffe U, Ullrich R, et al. (2007) Effect of chronic giardia lamblia infection on epithelial transport and barrier function in human duodenum. Gut 56(3): 328-335.
Vargas-Leal V, Bruno R, Derfuss T, Krumbholz M, Hohlfeld R, et al. (2005) Expression and function of glial cell line-derived neurotrophic factor family ligands and their receptors on human immune cells. J Immunol 175(4): 2301-2308.
Vereninov AA, Vassilieva IO, Yurinskaya VE, Matveev VV, Glushankova LN, et al. (2001) Differential transcription of ion transporters, NHE1, ATP1B1, NKCC1 in human peripheral blood lymphocytes activated to proliferation. Cell Physiol Biochem 11(1): 19-26.
Walse B, Dufe VT, Svensson B, Fritzson I, Dahlberg L, et al. (2008) The structures of human dihydroorotate dehydrogenase with and without inhibitor reveal conformational flexibility in the inhibitor and substrate binding sites. Biochemistry 47(34): 8929-8936.
Wang QY, Bushell S, Qing M, Xu HY, Bonavia A, et al. (2011) Inhibition of dengue virus through suppression of host pyrimidine biosynthesis. J Virol 85(13): 6548-6556.
Watarai M, Makino S, Michikawa M, Yanagisawa K, Murakami S, et al. (2002) Macrophage plasma membrane cholesterol contributes to brucella abortus infection of mice. Infect Immun 70(9): 4818-4825.
Whelehan CJ, Meade KG, Eckersall PD, Young FJ, O'Farrelly C. (2011) Experimental staphylococcus aureus infection of the mammary gland induces region-specific changes in innate immune gene expression. Vet Immunol Immunopathol 140(3-4): 181-189.
Wiesendanger M, Kneitz B, Edelmann W, Scharff MD. (2000) Somatic hypermutation in MutS homologue (MSH)3-, MSH6-, and MSH3/MSH6-deficient mice reveals a role for the MSH2-MSH6 heterodimer in modulating the base substitution pattern. J Exp Med 191(3): 579-584.
Wu W, Mehta H, Chakrabarty K, Booth JL, Duggan ES, et al. (2009) Resistance of human alveolar macrophages to bacillus anthracis lethal toxin. J Immunol 183(9): 5799-5806.
Xu Q, Katz J, Zhang P, Ashtekar AR, Gaddis DE, et al. (2011) Contribution of a streptococcus mutans antigen expressed by a salmonella vector vaccine in dendritic cell activation. Infect Immun .
Yuan J, Devarajan A, Moya-Castro R, Zhang M, Evans S, et al. (2010) Putative innate immunity of antiatherogenic paraoxanase-2 via STAT5 signal transduction in HIV-1 infection of hematopoietic TF-1 cells and in SCID-hu mice. J Stem Cells 5(1): 43-48.
Zuniga J, Buendia I, Zhao Y, Jimenez L, Torres D, et al. (2011) Genetic variants associated with severe pneumonia in A/H1N1 influenza infection. Eur Respir J .
